# Supplementary material for: The role of carbon dioxide and water in the degradation of zeolite 4A, zeolite 13X and silica gels
Source: Royal Society of Chemistry journal article supplement (doi:10.1039/d3nj00093a), 2023-01-01
Supplement: d3nj00093a1.pdf [file d3nj00093a1.pdf]

**The role of carbon dioxide and water in the degradation of zeolites 4A, 13X and silica gels**

John H. Jacobs, Connor E. Deering, Ruohong Sui, Amelia Cann, Kevin L. Lesage, and Robert A.

Marriott\*

Department of Chemistry, University of Calgary, 2500 University Drive, N.W., Calgary, AB

T2N 1N4, Canada

\* [rob.marriott@ucalgary.ca](mailto:rob.marriott@ucalgary.ca)

## **Table of contents**

|                                   |        |
|-----------------------------------|--------|
| Data tables.....                  | - 3 -  |
| N <sub>2</sub> physisorption..... | - 34 - |

## Data tables

**Table S1. Zeolite 4A capacities for the dry gas regeneration experiments.**

| $p_{\text{CO}_2} = 3.49 \text{ kPa}$<br>$p_{\text{H}_2\text{O}} = 2.39 \text{ kPa}$ |         |                                           | $p_{\text{CO}_2} = 34.9 \text{ kPa}$<br>$p_{\text{H}_2\text{O}} = 2.21 \text{ kPa}$ |         |                                           | $p_{\text{CO}_2} = 3.49 \text{ kPa}$<br>$p_{\text{H}_2\text{O}} = 2.21 \text{ kPa}$ |         |                                           |
|-------------------------------------------------------------------------------------|---------|-------------------------------------------|-------------------------------------------------------------------------------------|---------|-------------------------------------------|-------------------------------------------------------------------------------------|---------|-------------------------------------------|
| Cycle                                                                               | $n/n_0$ | $n^{\text{ads}}$<br>/mmol g <sup>-1</sup> | Cycle                                                                               | $n/n_0$ | $n^{\text{ads}}$<br>/mmol g <sup>-1</sup> | Cycle                                                                               | $n/n_0$ | $n^{\text{ads}}$<br>/mmol g <sup>-1</sup> |
| 50                                                                                  | 1.00    | 13.53                                     | 50                                                                                  | 1.00    | 13.53                                     | 45                                                                                  | 1.01    | 13.63                                     |
| 100                                                                                 | 0.99    | 13.45                                     | 100                                                                                 | 1.00    | 13.52                                     | 95                                                                                  | 0.99    | 13.45                                     |
| 140                                                                                 | 0.99    | 13.42                                     | 221                                                                                 | 0.99    | 13.46                                     | 145                                                                                 | 1.00    | 13.48                                     |
| 190                                                                                 | 0.99    | 13.34                                     | 271                                                                                 | 1.00    | 13.47                                     | 195                                                                                 | 0.99    | 13.36                                     |
| 240                                                                                 | 0.98    | 13.32                                     | 321                                                                                 | 0.99    | 13.40                                     | 245                                                                                 | 0.99    | 13.35                                     |
| 290                                                                                 | 0.98    | 13.32                                     | 371                                                                                 | 0.99    | 13.40                                     | 316                                                                                 | 0.98    | 13.31                                     |
| 340                                                                                 | 0.97    | 13.11                                     | 421                                                                                 | 0.99    | 13.40                                     | 366                                                                                 | 0.98    | 13.31                                     |
| 390                                                                                 | 0.97    | 13.08                                     | 471                                                                                 | 0.98    | 13.31                                     | 416                                                                                 | 0.98    | 13.28                                     |
| 440                                                                                 | 0.97    | 13.13                                     | 615                                                                                 | 0.99    | 13.33                                     | 466                                                                                 | 0.97    | 13.11                                     |
| 490                                                                                 | 0.97    | 13.13                                     | 665                                                                                 | 0.99    | 13.36                                     | 516                                                                                 | 0.98    | 13.31                                     |
| 540                                                                                 | 0.97    | 13.11                                     | 974                                                                                 | 0.98    | 13.21                                     | 566                                                                                 | 0.97    | 13.09                                     |
| 590                                                                                 | 0.97    | 13.17                                     | 1024                                                                                | 0.98    | 13.22                                     | 616                                                                                 | 0.98    | 13.21                                     |
| 640                                                                                 | 0.97    | 13.19                                     | 1074                                                                                | 0.97    | 13.15                                     | 666                                                                                 | 0.97    | 13.09                                     |
| 690                                                                                 | 0.96    | 12.98                                     | 1124                                                                                | 0.98    | 13.21                                     | 716                                                                                 | 0.97    | 13.11                                     |
| 740                                                                                 | 0.97    | 13.06                                     | 1174                                                                                | 0.98    | 13.24                                     | 766                                                                                 | 0.97    | 13.14                                     |
| 799                                                                                 | 0.95    | 12.90                                     | 1404                                                                                | 0.98    | 13.21                                     | 816                                                                                 | 0.95    | 12.90                                     |
| 849                                                                                 | 0.96    | 13.05                                     | 1454                                                                                | 0.98    | 13.22                                     | 866                                                                                 | 0.96    | 12.95                                     |
| 899                                                                                 | 0.97    | 13.06                                     | 1504                                                                                | 0.98    | 13.23                                     | 916                                                                                 | 0.95    | 12.80                                     |
| 949                                                                                 | 0.97    | 13.12                                     | 1554                                                                                | 0.97    | 13.19                                     | 966                                                                                 | 0.95    | 12.88                                     |
| 999                                                                                 | 0.96    | 13.03                                     | 1604                                                                                | 0.97    | 13.19                                     | 1016                                                                                | 0.95    | 12.81                                     |
| 1049                                                                                | 0.97    | 13.13                                     | 1654                                                                                | 0.98    | 13.21                                     | 1066                                                                                | 0.95    | 12.85                                     |
| 1099                                                                                | 0.97    | 13.13                                     | 1704                                                                                | 0.98    | 13.21                                     | 1116                                                                                | 0.95    | 12.82                                     |
| 1149                                                                                | 0.97    | 13.16                                     | 1754                                                                                | 0.97    | 13.18                                     | 1166                                                                                | 0.94    | 12.77                                     |
| 1199                                                                                | 0.96    | 12.98                                     | 1804                                                                                | 0.97    | 13.18                                     | 1216                                                                                | 0.94    | 12.69                                     |
| 1249                                                                                | 0.95    | 12.88                                     | 1854                                                                                | 0.98    | 13.21                                     | 1266                                                                                | 0.94    | 12.71                                     |
| 1299                                                                                | 0.95    | 12.91                                     | 1904                                                                                | 0.98    | 13.22                                     | 1316                                                                                | 0.94    | 12.66                                     |
| 1359                                                                                | 0.97    | 13.06                                     | 1954                                                                                | 0.98    | 13.25                                     | 1366                                                                                | 0.93    | 12.59                                     |
| 1409                                                                                | 0.98    | 13.20                                     | 2074                                                                                | 0.97    | 13.19                                     | 1416                                                                                | 0.93    | 12.63                                     |
| 1459                                                                                | 0.97    | 13.06                                     | 2124                                                                                | 0.97    | 13.11                                     | 1466                                                                                | 0.93    | 12.57                                     |
| 1509                                                                                | 0.97    | 13.13                                     | 2175                                                                                | 0.97    | 13.08                                     | 1516                                                                                | 0.93    | 12.63                                     |
| 1559                                                                                | 0.99    | 13.39                                     | 2225                                                                                | 0.96    | 12.97                                     | 1566                                                                                | 0.93    | 12.56                                     |
| 1609                                                                                | 0.98    | 13.27                                     | 2275                                                                                | 0.96    | 12.94                                     | 1616                                                                                | 0.93    | 12.64                                     |
| 1659                                                                                | 0.97    | 13.09                                     | 2325                                                                                | 0.95    | 12.89                                     | 1666                                                                                | 0.93    | 12.65                                     |
| 1709                                                                                | 0.96    | 12.93                                     | 2375                                                                                | 0.95    | 12.85                                     | 1716                                                                                | 0.94    | 12.66                                     |
| 1759                                                                                | 0.96    | 13.02                                     | 2425                                                                                | 0.95    | 12.88                                     | 1766                                                                                | 0.94    | 12.71                                     |

**Table S1.** Continued.

| $p_{\text{CO}_2} = 3.49 \text{ kPa}$<br>$p_{\text{H}_2\text{O}} = 2.39 \text{ kPa}$ |         |                                           | $p_{\text{CO}_2} = 34.9 \text{ kPa}$<br>$p_{\text{H}_2\text{O}} = 2.21 \text{ kPa}$ |         |                                           | $p_{\text{CO}_2} = 3.49 \text{ kPa}$<br>$p_{\text{H}_2\text{O}} = 2.21 \text{ kPa}$ |         |                                           |
|-------------------------------------------------------------------------------------|---------|-------------------------------------------|-------------------------------------------------------------------------------------|---------|-------------------------------------------|-------------------------------------------------------------------------------------|---------|-------------------------------------------|
| Cycle                                                                               | $n/n_0$ | $n^{\text{ads}}$<br>/mmol g <sup>-1</sup> | Cycle                                                                               | $n/n_0$ | $n^{\text{ads}}$<br>/mmol g <sup>-1</sup> | Cycle                                                                               | $n/n_0$ | $n^{\text{ads}}$<br>/mmol g <sup>-1</sup> |
| 1809                                                                                | 0.96    | 12.95                                     | 2475                                                                                | 0.96    | 12.95                                     | 1816                                                                                | 0.93    | 12.53                                     |
| 1859                                                                                | 0.96    | 13.00                                     | 2525                                                                                | 0.96    | 12.93                                     | 1866                                                                                | 0.93    | 12.62                                     |
| 1909                                                                                | 0.95    | 12.86                                     | 2575                                                                                | 0.95    | 12.90                                     | 1916                                                                                | 0.93    | 12.56                                     |
| 1959                                                                                | 0.97    | 13.14                                     | 2625                                                                                | 0.96    | 12.99                                     | 1966                                                                                | 0.93    | 12.64                                     |
| 2413                                                                                | 0.95    | 12.85                                     | 2675                                                                                | 0.96    | 12.95                                     | 2016                                                                                | 0.93    | 12.55                                     |
| 2463                                                                                | 0.96    | 13.03                                     | 2725                                                                                | 0.95    | 12.92                                     | 2066                                                                                | 0.92    | 12.51                                     |
| 2513                                                                                | 0.95    | 12.85                                     | 2775                                                                                | 0.95    | 12.91                                     | 2116                                                                                | 0.93    | 12.52                                     |
| 2563                                                                                | 0.94    | 12.70                                     | 2826                                                                                | 0.96    | 12.93                                     | 2166                                                                                | 0.93    | 12.61                                     |
| 2613                                                                                | 0.94    | 12.69                                     | 2876                                                                                | 0.96    | 12.94                                     | 2216                                                                                | 0.93    | 12.60                                     |
| 2663                                                                                | 0.95    | 12.82                                     | 2926                                                                                | 0.96    | 12.95                                     | 2266                                                                                | 0.93    | 12.56                                     |
| 2713                                                                                | 0.95    | 12.79                                     | 2976                                                                                | 0.96    | 12.98                                     | 2316                                                                                | 0.93    | 12.60                                     |
| 2763                                                                                | 0.93    | 12.57                                     | 3026                                                                                | 0.96    | 12.95                                     | 2366                                                                                | 0.93    | 12.56                                     |
| 2813                                                                                | 0.93    | 12.60                                     | 3076                                                                                | 0.95    | 12.92                                     | 2416                                                                                | 0.93    | 12.63                                     |
| 2863                                                                                | 0.93    | 12.54                                     | 3135                                                                                | 0.96    | 13.02                                     | 2466                                                                                | 0.92    | 12.52                                     |
| 2913                                                                                | 0.92    | 12.49                                     | 3185                                                                                | 0.96    | 12.94                                     | 2516                                                                                | 0.93    | 12.63                                     |
| 2963                                                                                | 0.93    | 12.57                                     | 3235                                                                                | 0.95    | 12.85                                     | 2566                                                                                | 0.93    | 12.58                                     |
| 3013                                                                                | 0.93    | 12.57                                     | 3285                                                                                | 0.95    | 12.82                                     | 2616                                                                                | 0.93    | 12.60                                     |
| 3063                                                                                | 0.92    | 12.50                                     | 3335                                                                                | 0.95    | 12.81                                     | 2666                                                                                | 0.93    | 12.55                                     |
| 3113                                                                                | 0.92    | 12.51                                     | 3385                                                                                | 0.94    | 12.76                                     | 2716                                                                                | 0.92    | 12.49                                     |
| 3163                                                                                | 0.92    | 12.43                                     | 3435                                                                                | 0.95    | 12.80                                     | 2766                                                                                | 0.93    | 12.61                                     |
| 3213                                                                                | 0.91    | 12.35                                     | 3485                                                                                | 0.95    | 12.86                                     | 2816                                                                                | 0.93    | 12.54                                     |
| 3263                                                                                | 0.91    | 12.34                                     | 3535                                                                                | 0.95    | 12.80                                     | 2866                                                                                | 0.93    | 12.62                                     |
| 3313                                                                                | 0.91    | 12.31                                     | 3585                                                                                | 0.94    | 12.72                                     | 2916                                                                                | 0.93    | 12.59                                     |
| 3363                                                                                | 0.91    | 12.37                                     | 3635                                                                                | 0.94    | 12.73                                     | 2966                                                                                | 0.93    | 12.62                                     |
| 3413                                                                                | 0.92    | 12.44                                     | 3685                                                                                | 0.94    | 12.72                                     | 3016                                                                                | 0.93    | 12.60                                     |
| 3463                                                                                | 0.93    | 12.54                                     | 3735                                                                                | 0.94    | 12.72                                     | 3066                                                                                | 0.93    | 12.63                                     |
| 3513                                                                                | 0.91    | 12.34                                     | 3791                                                                                | 0.94    | 12.75                                     | 3116                                                                                | 0.93    | 12.58                                     |
| 3563                                                                                | 0.91    | 12.33                                     | 3841                                                                                | 0.95    | 12.79                                     | 3166                                                                                | 0.93    | 12.57                                     |
| 3613                                                                                | 0.92    | 12.41                                     | 3896                                                                                | 0.94    | 12.76                                     | 3216                                                                                | 0.93    | 12.57                                     |
| 3663                                                                                | 0.93    | 12.53                                     | 3946                                                                                | 0.94    | 12.74                                     | 3266                                                                                | 0.93    | 12.58                                     |
| 3713                                                                                | 0.93    | 12.54                                     | 3996                                                                                | 0.94    | 12.76                                     | 3316                                                                                | 0.92    | 12.44                                     |
| 3763                                                                                | 0.92    | 12.46                                     | 4046                                                                                | 0.94    | 12.72                                     | 3366                                                                                | 0.93    | 12.57                                     |
| 3813                                                                                | 0.92    | 12.45                                     | 4096                                                                                | 0.94    | 12.77                                     | 3416                                                                                | 0.93    | 12.60                                     |
| 3863                                                                                | 0.91    | 12.27                                     | 4340                                                                                | 0.94    | 12.72                                     | 3466                                                                                | 0.93    | 12.64                                     |
| 3913                                                                                | 0.90    | 12.24                                     | 4390                                                                                | 0.94    | 12.68                                     | 3516                                                                                | 0.93    | 12.55                                     |
| 3963                                                                                | 0.90    | 12.14                                     | 4440                                                                                | 0.93    | 12.63                                     | 3566                                                                                | 0.93    | 12.58                                     |

**Table S1.** Continued.

| $p_{\text{CO}_2} = 3.49 \text{ kPa}$<br>$p_{\text{H}_2\text{O}} = 2.39 \text{ kPa}$ |         |                                           | $p_{\text{CO}_2} = 34.9 \text{ kPa}$<br>$p_{\text{H}_2\text{O}} = 2.21 \text{ kPa}$ |         |                                           | $p_{\text{CO}_2} = 3.49 \text{ kPa}$<br>$p_{\text{H}_2\text{O}} = 2.21 \text{ kPa}$ |         |                                           |
|-------------------------------------------------------------------------------------|---------|-------------------------------------------|-------------------------------------------------------------------------------------|---------|-------------------------------------------|-------------------------------------------------------------------------------------|---------|-------------------------------------------|
| Cycle                                                                               | $n/n_0$ | $n^{\text{ads}}$<br>/mmol g <sup>-1</sup> | Cycle                                                                               | $n/n_0$ | $n^{\text{ads}}$<br>/mmol g <sup>-1</sup> | Cycle                                                                               | $n/n_0$ | $n^{\text{ads}}$<br>/mmol g <sup>-1</sup> |
| 4013                                                                                | 0.89    | 12.07                                     | 4490                                                                                | 0.92    | 12.47                                     | 3616                                                                                | 0.93    | 12.52                                     |
| 4063                                                                                | 0.89    | 12.10                                     | 4540                                                                                | 0.93    | 12.54                                     | 3666                                                                                | 0.94    | 12.72                                     |
| 4113                                                                                | 0.89    | 12.05                                     | 4590                                                                                | 0.93    | 12.55                                     | 3716                                                                                | 0.93    | 12.56                                     |
| 4163                                                                                | 0.89    | 12.01                                     | 4640                                                                                | 0.93    | 12.56                                     | 3766                                                                                | 0.93    | 12.57                                     |
| 4213                                                                                | 0.90    | 12.16                                     | 4690                                                                                | 0.92    | 12.50                                     | 3816                                                                                | 0.93    | 12.62                                     |
| 4263                                                                                | 0.90    | 12.11                                     | 4740                                                                                | 0.93    | 12.56                                     | 3866                                                                                | 0.93    | 12.54                                     |
| 4317                                                                                | 0.90    | 12.12                                     | 4790                                                                                | 0.93    | 12.64                                     | 3916                                                                                | 0.94    | 12.70                                     |
| 4367                                                                                | 0.90    | 12.16                                     | 4840                                                                                | 0.93    | 12.64                                     | 3966                                                                                | 0.92    | 12.43                                     |
| 4417                                                                                | 0.90    | 12.17                                     | 4890                                                                                | 0.93    | 12.63                                     | 4016                                                                                | 0.92    | 12.45                                     |
| 4467                                                                                | 0.90    | 12.16                                     | 5002                                                                                | 0.94    | 12.67                                     | 4066                                                                                | 0.92    | 12.44                                     |
| 4517                                                                                | 0.90    | 12.14                                     | 5052                                                                                | 0.93    | 12.62                                     | 4116                                                                                | 0.92    | 12.43                                     |
| 4567                                                                                | 0.89    | 12.06                                     | 5097                                                                                | 0.93    | 12.65                                     | 4166                                                                                | 0.92    | 12.44                                     |
| 4617                                                                                | 0.91    | 12.30                                     |                                                                                     |         |                                           | 4216                                                                                | 0.92    | 12.45                                     |
| 4669                                                                                | 0.91    | 12.32                                     |                                                                                     |         |                                           | 4266                                                                                | 0.92    | 12.39                                     |
| 4719                                                                                | 0.93    | 12.62                                     |                                                                                     |         |                                           | 4316                                                                                | 0.92    | 12.45                                     |
| 4769                                                                                | 0.90    | 12.21                                     |                                                                                     |         |                                           | 4366                                                                                | 0.92    | 12.46                                     |
| 4819                                                                                | 0.92    | 12.52                                     |                                                                                     |         |                                           | 4416                                                                                | 0.92    | 12.42                                     |
| 4869                                                                                | 0.93    | 12.58                                     |                                                                                     |         |                                           | 4466                                                                                | 0.91    | 12.30                                     |
| 4919                                                                                | 0.93    | 12.55                                     |                                                                                     |         |                                           | 4516                                                                                | 0.91    | 12.30                                     |
| 4969                                                                                | 0.91    | 12.33                                     |                                                                                     |         |                                           | 4566                                                                                | 0.91    | 12.36                                     |
| 5019                                                                                | 0.91    | 12.27                                     |                                                                                     |         |                                           | 4616                                                                                | 0.91    | 12.35                                     |
| 5069                                                                                | 0.90    | 12.22                                     |                                                                                     |         |                                           | 4666                                                                                | 0.91    | 12.34                                     |
| 5119                                                                                | 0.89    | 12.11                                     |                                                                                     |         |                                           | 4716                                                                                | 0.91    | 12.30                                     |
| 5169                                                                                | 0.89    | 12.09                                     |                                                                                     |         |                                           | 4766                                                                                | 0.90    | 12.12                                     |
|                                                                                     |         |                                           |                                                                                     |         |                                           | 4816                                                                                | 0.89    | 12.08                                     |
|                                                                                     |         |                                           |                                                                                     |         |                                           | 4866                                                                                | 0.88    | 11.94                                     |
|                                                                                     |         |                                           |                                                                                     |         |                                           | 4916                                                                                | 0.88    | 11.97                                     |
|                                                                                     |         |                                           |                                                                                     |         |                                           | 4966                                                                                | 0.88    | 11.94                                     |
|                                                                                     |         |                                           |                                                                                     |         |                                           | 5016                                                                                | 0.88    | 11.97                                     |
|                                                                                     |         |                                           |                                                                                     |         |                                           | 5066                                                                                | 0.89    | 11.99                                     |
|                                                                                     |         |                                           |                                                                                     |         |                                           | 5116                                                                                | 0.88    | 11.92                                     |
|                                                                                     |         |                                           |                                                                                     |         |                                           | 5166                                                                                | 0.88    | 11.86                                     |
|                                                                                     |         |                                           |                                                                                     |         |                                           | 5236                                                                                | 0.88    | 11.89                                     |

**Table S2. Zeolite 4A capacities for the wet gas regeneration experiments.**

| $p_{\text{CO}_2} = 3.49 \text{ kPa}$<br>$p_{\text{H}_2\text{O}} = 2.39 \text{ kPa}$ |         |                                           | $p_{\text{CO}_2} = 34.9 \text{ kPa}$<br>$p_{\text{H}_2\text{O}} = 2.21 \text{ kPa}$ |         |                                           | $p_{\text{CO}_2} = 3.49 \text{ kPa}$<br>$p_{\text{H}_2\text{O}} = 2.21 \text{ kPa}$ |         |                                           |
|-------------------------------------------------------------------------------------|---------|-------------------------------------------|-------------------------------------------------------------------------------------|---------|-------------------------------------------|-------------------------------------------------------------------------------------|---------|-------------------------------------------|
| Cycle                                                                               | $n/n_0$ | $n^{\text{ads}}$<br>/mmol g <sup>-1</sup> | Cycle                                                                               | $n/n_0$ | $n^{\text{ads}}$<br>/mmol g <sup>-1</sup> | Cycle                                                                               | $n/n_0$ | $n^{\text{ads}}$<br>/mmol g <sup>-1</sup> |
| 50                                                                                  | 1.00    | 13.53                                     | 50                                                                                  | 1.00    | 13.53                                     | 45                                                                                  | 1.00    | 13.54                                     |
| 100                                                                                 | 0.99    | 13.35                                     | 100                                                                                 | 1.00    | 13.47                                     | 95                                                                                  | 1.00    | 13.58                                     |
| 150                                                                                 | 0.98    | 13.26                                     | 150                                                                                 | 1.00    | 13.49                                     | 145                                                                                 | 1.02    | 13.77                                     |
| 200                                                                                 | 0.99    | 13.39                                     | 200                                                                                 | 0.99    | 13.45                                     | 195                                                                                 | 1.00    | 13.51                                     |
| 250                                                                                 | 0.98    | 13.28                                     | 250                                                                                 | 1.00    | 13.52                                     | 245                                                                                 | 1.01    | 13.69                                     |
| 300                                                                                 | 0.99    | 13.40                                     | 300                                                                                 | 1.00    | 13.50                                     | 295                                                                                 | 0.99    | 13.33                                     |
| 350                                                                                 | 0.99    | 13.46                                     | 350                                                                                 | 1.00    | 13.52                                     | 345                                                                                 | 0.97    | 13.09                                     |
| 400                                                                                 | 0.99    | 13.46                                     | 400                                                                                 | 1.00    | 13.51                                     | 395                                                                                 | 0.97    | 13.13                                     |
| 450                                                                                 | 1.00    | 13.47                                     | 450                                                                                 | 1.00    | 13.49                                     | 445                                                                                 | 0.97    | 13.11                                     |
| 500                                                                                 | 1.00    | 13.51                                     | 500                                                                                 | 1.00    | 13.50                                     | 495                                                                                 | 0.98    | 13.31                                     |
| 550                                                                                 | 0.99    | 13.42                                     | 550                                                                                 | 1.00    | 13.50                                     | 545                                                                                 | 0.98    | 13.22                                     |
| 600                                                                                 | 1.00    | 13.47                                     | 600                                                                                 | 0.99    | 13.43                                     | 595                                                                                 | 0.98    | 13.30                                     |
| 650                                                                                 | 0.99    | 13.45                                     | 650                                                                                 | 0.99    | 13.42                                     | 645                                                                                 | 0.97    | 13.12                                     |
| 700                                                                                 | 1.00    | 13.50                                     | 700                                                                                 | 0.99    | 13.40                                     | 695                                                                                 | 0.98    | 13.26                                     |
| 750                                                                                 | 0.99    | 13.42                                     | 750                                                                                 | 0.99    | 13.44                                     | 745                                                                                 | 0.98    | 13.21                                     |
| 800                                                                                 | 0.99    | 13.46                                     | 800                                                                                 | 0.99    | 13.40                                     | 795                                                                                 | 0.95    | 12.89                                     |
| 850                                                                                 | 1.00    | 13.54                                     | 850                                                                                 | 0.99    | 13.41                                     | 845                                                                                 | 0.94    | 12.78                                     |
| 900                                                                                 | 0.99    | 13.44                                     | 900                                                                                 | 0.99    | 13.41                                     | 895                                                                                 | 0.94    | 12.76                                     |
| 950                                                                                 | 0.98    | 13.32                                     | 950                                                                                 | 0.99    | 13.42                                     | 945                                                                                 | 0.95    | 12.80                                     |
| 1000                                                                                | 0.99    | 13.34                                     | 1000                                                                                | 0.99    | 13.44                                     | 995                                                                                 | 0.93    | 12.55                                     |
| 1050                                                                                | 0.98    | 13.27                                     | 1050                                                                                | 0.99    | 13.42                                     | 1045                                                                                | 0.94    | 12.77                                     |
| 1100                                                                                | 0.98    | 13.30                                     | 1100                                                                                | 0.99    | 13.42                                     | 1095                                                                                | 0.93    | 12.53                                     |
| 1150                                                                                | 0.98    | 13.28                                     | 1150                                                                                | 0.99    | 13.40                                     | 1145                                                                                | 0.93    | 12.54                                     |
| 1200                                                                                | 0.98    | 13.30                                     | 1200                                                                                | 0.99    | 13.39                                     | 1195                                                                                | 0.92    | 12.40                                     |
| 1250                                                                                | 0.97    | 13.18                                     | 1250                                                                                | 0.99    | 13.40                                     | 1245                                                                                | 0.92    | 12.42                                     |
| 1300                                                                                | 0.97    | 13.13                                     | 1300                                                                                | 0.99    | 13.39                                     | 1295                                                                                | 0.91    | 12.30                                     |
| 1350                                                                                | 0.97    | 13.14                                     | 1350                                                                                | 0.99    | 13.42                                     | 1345                                                                                | 0.90    | 12.24                                     |
| 1400                                                                                | 0.98    | 13.20                                     | 1400                                                                                | 0.99    | 13.37                                     | 1395                                                                                | 0.91    | 12.36                                     |
| 1450                                                                                | 0.97    | 13.12                                     | 1450                                                                                | 0.99    | 13.41                                     | 1445                                                                                | 0.91    | 12.27                                     |
| 1500                                                                                | 0.97    | 13.13                                     | 1500                                                                                | 0.99    | 13.41                                     | 1495                                                                                | 0.92    | 12.51                                     |
| 1580                                                                                | 0.98    | 13.20                                     | 1550                                                                                | 0.99    | 13.42                                     | 1545                                                                                | 0.91    | 12.38                                     |
| 1630                                                                                | 0.97    | 13.10                                     | 1600                                                                                | 0.99    | 13.43                                     | 1595                                                                                | 0.93    | 12.62                                     |
| 1680                                                                                | 0.97    | 13.07                                     | 1650                                                                                | 0.99    | 13.41                                     | 1645                                                                                | 0.92    | 12.42                                     |
| 1730                                                                                | 0.96    | 13.06                                     | 1700                                                                                | 0.99    | 13.42                                     | 1695                                                                                | 0.94    | 12.67                                     |
| 1780                                                                                | 0.96    | 13.00                                     | 1750                                                                                | 0.99    | 13.45                                     | 1745                                                                                | 0.92    | 12.51                                     |
| 1830                                                                                | 0.96    | 12.93                                     | 1800                                                                                | 0.99    | 13.43                                     | 1795                                                                                | 0.93    | 12.52                                     |

**Table S2.** Continued.

| $p_{\text{CO}_2} = 3.49 \text{ kPa}$<br>$p_{\text{H}_2\text{O}} = 2.39 \text{ kPa}$ |         |                                           | $p_{\text{CO}_2} = 34.9 \text{ kPa}$<br>$p_{\text{H}_2\text{O}} = 2.21 \text{ kPa}$ |         |                                           | $p_{\text{CO}_2} = 3.49 \text{ kPa}$<br>$p_{\text{H}_2\text{O}} = 2.21 \text{ kPa}$ |         |                                           |
|-------------------------------------------------------------------------------------|---------|-------------------------------------------|-------------------------------------------------------------------------------------|---------|-------------------------------------------|-------------------------------------------------------------------------------------|---------|-------------------------------------------|
| Cycle                                                                               | $n/n_0$ | $n^{\text{ads}}$<br>/mmol g <sup>-1</sup> | Cycle                                                                               | $n/n_0$ | $n^{\text{ads}}$<br>/mmol g <sup>-1</sup> | Cycle                                                                               | $n/n_0$ | $n^{\text{ads}}$<br>/mmol g <sup>-1</sup> |
| 1880                                                                                | 0.96    | 12.99                                     | 1850                                                                                | 0.99    | 13.40                                     | 1845                                                                                | 0.90    | 12.22                                     |
| 1930                                                                                | 0.96    | 12.96                                     | 1900                                                                                | 0.99    | 13.42                                     | 1895                                                                                | 0.93    | 12.52                                     |
| 2000                                                                                | 0.96    | 12.95                                     | 1950                                                                                | 0.99    | 13.39                                     | 1945                                                                                | 0.92    | 12.40                                     |
| 2050                                                                                | 0.95    | 12.92                                     | 2000                                                                                | 0.99    | 13.44                                     | 1995                                                                                | 0.93    | 12.52                                     |
| 2100                                                                                | 0.95    | 12.88                                     | 2050                                                                                | 0.99    | 13.41                                     | 2045                                                                                | 0.94    | 12.73                                     |
| 2150                                                                                | 0.95    | 12.87                                     | 2100                                                                                | 1.00    | 13.49                                     | 2095                                                                                | 0.90    | 12.21                                     |
| 2200                                                                                | 0.95    | 12.90                                     | 2150                                                                                | 0.99    | 13.45                                     | 2145                                                                                | 0.92    | 12.47                                     |
| 2250                                                                                | 0.95    | 12.87                                     | 2201                                                                                | 0.99    | 13.44                                     | 2195                                                                                | 0.90    | 12.15                                     |
| 2300                                                                                | 0.95    | 12.85                                     | 2251                                                                                | 0.99    | 13.41                                     | 2245                                                                                | 0.92    | 12.44                                     |
| 2350                                                                                | 0.95    | 12.85                                     | 2302                                                                                | 0.99    | 13.38                                     | 2295                                                                                | 0.91    | 12.28                                     |
| 2400                                                                                | 0.95    | 12.82                                     | 2352                                                                                | 0.99    | 13.36                                     | 2345                                                                                | 0.92    | 12.40                                     |
| 2455                                                                                | 0.95    | 12.80                                     | 2402                                                                                | 0.99    | 13.36                                     | 2395                                                                                | 0.91    | 12.27                                     |
| 2505                                                                                | 0.95    | 12.79                                     | 2452                                                                                | 0.99    | 13.35                                     | 2445                                                                                | 0.91    | 12.29                                     |
| 2555                                                                                | 0.94    | 12.75                                     | 2502                                                                                | 0.99    | 13.37                                     | 2495                                                                                | 0.90    | 12.18                                     |
| 2609                                                                                | 0.93    | 12.61                                     | 2552                                                                                | 0.99    | 13.37                                     | 2545                                                                                | 0.91    | 12.37                                     |
| 2659                                                                                | 0.93    | 12.61                                     | 2602                                                                                | 0.99    | 13.35                                     | 2595                                                                                | 0.93    | 12.60                                     |
| 2709                                                                                | 0.93    | 12.59                                     | 2652                                                                                | 0.99    | 13.37                                     | 2645                                                                                | 0.91    | 12.35                                     |
| 2759                                                                                | 0.93    | 12.55                                     | 2702                                                                                | 0.99    | 13.34                                     | 2695                                                                                | 0.91    | 12.31                                     |
| 2809                                                                                | 0.93    | 12.56                                     | 2752                                                                                | 0.99    | 13.37                                     | 2745                                                                                | 0.90    | 12.14                                     |
| 2859                                                                                | 0.93    | 12.57                                     | 2802                                                                                | 0.99    | 13.34                                     | 2795                                                                                | 0.94    | 12.77                                     |
| 2909                                                                                | 0.93    | 12.57                                     | 2852                                                                                | 0.99    | 13.38                                     | 2845                                                                                | 0.93    | 12.56                                     |
| 2959                                                                                | 0.93    | 12.61                                     | 2902                                                                                | 0.99    | 13.33                                     | 2895                                                                                | 0.94    | 12.71                                     |
| 3009                                                                                | 0.93    | 12.65                                     | 2952                                                                                | 0.99    | 13.36                                     | 2946                                                                                | 0.93    | 12.58                                     |
| 3059                                                                                | 0.93    | 12.65                                     | 3003                                                                                | 0.99    | 13.37                                     | 2996                                                                                | 0.91    | 12.38                                     |
| 3109                                                                                | 0.94    | 12.68                                     | 3053                                                                                | 0.99    | 13.35                                     | 3046                                                                                | 0.94    | 12.74                                     |
| 3159                                                                                | 0.94    | 12.68                                     | 3103                                                                                | 0.99    | 13.36                                     | 3096                                                                                | 0.91    | 12.38                                     |
| 3209                                                                                | 0.94    | 12.70                                     | 3153                                                                                | 0.99    | 13.36                                     | 3146                                                                                | 0.89    | 12.06                                     |
| 3259                                                                                | 0.94    | 12.69                                     | 3203                                                                                | 0.99    | 13.34                                     | 3196                                                                                | 0.89    | 12.02                                     |
| 3309                                                                                | 0.94    | 12.71                                     | 3253                                                                                | 0.99    | 13.37                                     | 3246                                                                                | 0.90    | 12.18                                     |
| 3359                                                                                | 0.94    | 12.73                                     | 3303                                                                                | 0.99    | 13.36                                     | 3296                                                                                | 0.90    | 12.18                                     |
| 3409                                                                                | 0.94    | 12.77                                     | 3353                                                                                | 0.99    | 13.36                                     | 3346                                                                                | 0.90    | 12.24                                     |
| 3459                                                                                | 0.94    | 12.73                                     | 3403                                                                                | 0.99    | 13.37                                     | 3396                                                                                | 0.91    | 12.27                                     |
| 3509                                                                                | 0.94    | 12.75                                     | 3453                                                                                | 0.99    | 13.35                                     | 3446                                                                                | 0.91    | 12.28                                     |
| 3559                                                                                | 0.94    | 12.76                                     | 3503                                                                                | 0.99    | 13.35                                     | 3496                                                                                | 0.91    | 12.25                                     |
| 3609                                                                                | 0.94    | 12.77                                     | 3554                                                                                | 0.99    | 13.37                                     | 3546                                                                                | 0.88    | 11.96                                     |
| 3659                                                                                | 0.94    | 12.78                                     | 3604                                                                                | 0.99    | 13.37                                     | 3596                                                                                | 0.90    | 12.23                                     |

**Table S2.** Continued.

| $p_{\text{CO}_2} = 3.49 \text{ kPa}$<br>$p_{\text{H}_2\text{O}} = 2.39 \text{ kPa}$ |         |                                           | $p_{\text{CO}_2} = 34.9 \text{ kPa}$<br>$p_{\text{H}_2\text{O}} = 2.21 \text{ kPa}$ |         |                                           | $p_{\text{CO}_2} = 3.49 \text{ kPa}$<br>$p_{\text{H}_2\text{O}} = 2.21 \text{ kPa}$ |         |                                           |
|-------------------------------------------------------------------------------------|---------|-------------------------------------------|-------------------------------------------------------------------------------------|---------|-------------------------------------------|-------------------------------------------------------------------------------------|---------|-------------------------------------------|
| Cycle                                                                               | $n/n_0$ | $n^{\text{ads}}$<br>/mmol g <sup>-1</sup> | Cycle                                                                               | $n/n_0$ | $n^{\text{ads}}$<br>/mmol g <sup>-1</sup> | Cycle                                                                               | $n/n_0$ | $n^{\text{ads}}$<br>/mmol g <sup>-1</sup> |
| 3709                                                                                | 0.94    | 12.67                                     | 3654                                                                                | 0.99    | 13.38                                     | 3646                                                                                | 0.87    | 11.75                                     |
| 3759                                                                                | 0.94    | 12.78                                     | 3704                                                                                | 0.99    | 13.37                                     | 3696                                                                                | 0.87    | 11.80                                     |
| 3809                                                                                | 0.94    | 12.77                                     | 3754                                                                                | 0.99    | 13.36                                     | 3746                                                                                | 0.90    | 12.17                                     |
| 3859                                                                                | 0.95    | 12.83                                     | 3804                                                                                | 0.99    | 13.38                                     | 3796                                                                                | 0.91    | 12.25                                     |
| 3909                                                                                | 0.95    | 12.80                                     | 3854                                                                                | 0.99    | 13.37                                     | 3846                                                                                | 0.90    | 12.22                                     |
| 3959                                                                                | 0.95    | 12.83                                     | 3904                                                                                | 0.99    | 13.38                                     | 3896                                                                                | 0.88    | 11.88                                     |
| 4009                                                                                | 0.94    | 12.69                                     | 3954                                                                                | 0.99    | 13.37                                     | 3946                                                                                | 0.90    | 12.21                                     |
| 4059                                                                                | 0.94    | 12.69                                     | 4004                                                                                | 0.99    | 13.38                                     | 3996                                                                                | 0.87    | 11.72                                     |
| 4109                                                                                | 0.95    | 12.79                                     | 4057                                                                                | 0.99    | 13.39                                     | 4046                                                                                | 0.92    | 12.39                                     |
| 4159                                                                                | 0.94    | 12.71                                     | 4107                                                                                | 0.99    | 13.36                                     | 4096                                                                                | 0.90    | 12.15                                     |
| 4209                                                                                | 0.94    | 12.77                                     | 4159                                                                                | 0.99    | 13.37                                     | 4146                                                                                | 0.89    | 12.02                                     |
| 4259                                                                                | 0.94    | 12.67                                     | 4209                                                                                | 0.99    | 13.38                                     | 4196                                                                                | 0.88    | 11.94                                     |
| 4309                                                                                | 0.94    | 12.78                                     | 4259                                                                                | 0.99    | 13.37                                     | 4246                                                                                | 0.89    | 12.08                                     |
| 4359                                                                                | 0.94    | 12.69                                     | 4309                                                                                | 0.99    | 13.38                                     | 4296                                                                                | 0.91    | 12.25                                     |
| 4409                                                                                | 0.94    | 12.73                                     | 4359                                                                                | 0.99    | 13.38                                     | 4346                                                                                | 0.89    | 12.10                                     |
| 4459                                                                                | 0.94    | 12.72                                     | 4409                                                                                | 0.99    | 13.38                                     | 4396                                                                                | 0.92    | 12.40                                     |
| 4509                                                                                | 0.94    | 12.72                                     | 4459                                                                                | 0.99    | 13.39                                     | 4446                                                                                | 0.87    | 11.83                                     |
| 4559                                                                                | 0.95    | 12.83                                     | 4509                                                                                | 0.99    | 13.38                                     | 4496                                                                                | 0.90    | 12.18                                     |
| 4609                                                                                | 0.94    | 12.68                                     | 4559                                                                                | 0.99    | 13.36                                     | 4546                                                                                | 0.88    | 11.86                                     |
| 4659                                                                                | 0.95    | 12.79                                     | 4609                                                                                | 0.99    | 13.39                                     | 4596                                                                                | 0.89    | 12.06                                     |
| 4709                                                                                | 0.94    | 12.68                                     | 4659                                                                                | 0.99    | 13.35                                     | 4646                                                                                | 0.89    | 12.06                                     |
| 4759                                                                                | 0.94    | 12.77                                     | 4709                                                                                | 0.99    | 13.36                                     | 4696                                                                                | 0.88    | 11.88                                     |
| 4809                                                                                | 0.94    | 12.78                                     | 4759                                                                                | 0.99    | 13.37                                     | 4746                                                                                | 0.88    | 11.88                                     |
| 4859                                                                                | 0.95    | 12.83                                     | 4809                                                                                | 0.99    | 13.37                                     | 4796                                                                                | 0.88    | 11.88                                     |
| 4909                                                                                | 0.95    | 12.91                                     | 4859                                                                                | 0.99    | 13.38                                     | 4846                                                                                | 0.88    | 11.90                                     |
| 4959                                                                                | 0.94    | 12.71                                     | 4909                                                                                | 0.99    | 13.38                                     | 4896                                                                                | 0.87    | 11.82                                     |
| 5009                                                                                | 0.94    | 12.78                                     | 4959                                                                                | 0.99    | 13.38                                     | 4946                                                                                | 0.90    | 12.15                                     |
| 5059                                                                                | 0.94    | 12.75                                     | 5009                                                                                | 0.99    | 13.38                                     | 4996                                                                                | 0.87    | 11.83                                     |
| 5109                                                                                | 0.95    | 12.85                                     | 5059                                                                                | 0.99    | 13.37                                     | 5046                                                                                | 0.90    | 12.12                                     |
| 5159                                                                                | 0.95    | 12.83                                     | 5069                                                                                | 0.98    | 13.33                                     | 5096                                                                                | 0.88    | 11.90                                     |
| 5209                                                                                | 0.94    | 12.74                                     |                                                                                     |         |                                           | 5146                                                                                | 0.88    | 11.84                                     |
| 5259                                                                                | 0.94    | 12.79                                     |                                                                                     |         |                                           | 5186                                                                                | 0.88    | 11.85                                     |
| 5309                                                                                | 0.94    | 12.73                                     |                                                                                     |         |                                           |                                                                                     |         |                                           |
| 5359                                                                                | 0.94    | 12.75                                     |                                                                                     |         |                                           |                                                                                     |         |                                           |



**Table S3. Zeolite 13X capacities for the dry gas regeneration experiments.**

| $p_{\text{CO}_2} = 3.49 \text{ kPa}$<br>$p_{\text{H}_2\text{O}} = 2.39 \text{ kPa}$ |         |                                           | $p_{\text{CO}_2} = 34.9 \text{ kPa}$<br>$p_{\text{H}_2\text{O}} = 2.21 \text{ kPa}$ |         |                                           | $p_{\text{CO}_2} = 3.49 \text{ kPa}$<br>$p_{\text{H}_2\text{O}} = 2.21 \text{ kPa}$ |         |                                           |
|-------------------------------------------------------------------------------------|---------|-------------------------------------------|-------------------------------------------------------------------------------------|---------|-------------------------------------------|-------------------------------------------------------------------------------------|---------|-------------------------------------------|
| Cycle                                                                               | $n/n_0$ | $n^{\text{ads}}$<br>/mmol g <sup>-1</sup> | Cycle                                                                               | $n/n_0$ | $n^{\text{ads}}$<br>/mmol g <sup>-1</sup> | Cycle                                                                               | $n/n_0$ | $n^{\text{ads}}$<br>/mmol g <sup>-1</sup> |
| 50                                                                                  | 1.00    | 13.60                                     | 50                                                                                  | 1.00    | 13.57                                     | 45                                                                                  | 0.99    | 13.53                                     |
| 100                                                                                 | 0.99    | 13.48                                     | 100                                                                                 | 0.99    | 13.47                                     | 95                                                                                  | 1.03    | 14.03                                     |
| 150                                                                                 | 0.98    | 13.39                                     | 221                                                                                 | 0.99    | 13.53                                     | 145                                                                                 | 1.02    | 13.80                                     |
| 200                                                                                 | 0.97    | 13.22                                     | 271                                                                                 | 1.00    | 13.57                                     | 195                                                                                 | 0.98    | 13.33                                     |
| 250                                                                                 | 0.97    | 13.15                                     | 321                                                                                 | 1.00    | 13.62                                     | 245                                                                                 | 0.97    | 13.13                                     |
| 300                                                                                 | 0.96    | 13.09                                     | 371                                                                                 | 1.00    | 13.56                                     | 316                                                                                 | 0.99    | 13.50                                     |
| 350                                                                                 | 0.94    | 12.76                                     | 421                                                                                 | 0.99    | 13.50                                     | 366                                                                                 | 0.98    | 13.36                                     |
| 400                                                                                 | 0.94    | 12.73                                     | 471                                                                                 | 0.98    | 13.39                                     | 416                                                                                 | 0.93    | 12.59                                     |
| 450                                                                                 | 0.93    | 12.63                                     | 615                                                                                 | 0.98    | 13.35                                     | 466                                                                                 | 0.94    | 12.73                                     |
| 500                                                                                 | 0.94    | 12.72                                     | 665                                                                                 | 0.99    | 13.48                                     | 516                                                                                 | 0.86    | 11.69                                     |
| 550                                                                                 | 0.93    | 12.59                                     | 974                                                                                 | 0.97    | 13.20                                     | 566                                                                                 | 0.89    | 12.09                                     |
| 600                                                                                 | 0.93    | 12.65                                     | 1024                                                                                | 0.96    | 13.11                                     | 616                                                                                 | 0.86    | 11.64                                     |
| 650                                                                                 | 0.92    | 12.54                                     | 1074                                                                                | 0.96    | 13.01                                     | 666                                                                                 | 0.86    | 11.73                                     |
| 700                                                                                 | 0.91    | 12.35                                     | 1124                                                                                | 0.97    | 13.15                                     | 716                                                                                 | 0.86    | 11.66                                     |
| 750                                                                                 | 0.91    | 12.31                                     | 1174                                                                                | 0.97    | 13.25                                     | 766                                                                                 | 0.84    | 11.43                                     |
| 809                                                                                 | 0.89    | 12.17                                     | 1404                                                                                | 0.97    | 13.22                                     | 816                                                                                 | 0.86    | 11.73                                     |
| 859                                                                                 | 0.90    | 12.22                                     | 1454                                                                                | 0.98    | 13.26                                     | 866                                                                                 | 0.86    | 11.74                                     |
| 909                                                                                 | 0.90    | 12.19                                     | 1504                                                                                | 0.98    | 13.27                                     | 916                                                                                 | 0.89    | 12.15                                     |
| 959                                                                                 | 0.90    | 12.25                                     | 1554                                                                                | 0.97    | 13.18                                     | 966                                                                                 | 0.88    | 11.97                                     |
| 1009                                                                                | 0.89    | 12.13                                     | 1604                                                                                | 0.97    | 13.20                                     | 1016                                                                                | 0.89    | 12.04                                     |
| 1059                                                                                | 0.90    | 12.28                                     | 1654                                                                                | 0.98    | 13.28                                     | 1066                                                                                | 0.88    | 11.98                                     |
| 1109                                                                                | 0.91    | 12.40                                     | 1704                                                                                | 0.98    | 13.28                                     | 1116                                                                                | 0.90    | 12.24                                     |
| 1159                                                                                | 0.91    | 12.40                                     | 1754                                                                                | 0.97    | 13.22                                     | 1166                                                                                | 0.89    | 12.07                                     |
| 1209                                                                                | 0.90    | 12.20                                     | 1804                                                                                | 0.97    | 13.22                                     | 1216                                                                                | 0.89    | 12.12                                     |
| 1259                                                                                | 0.89    | 12.11                                     | 1854                                                                                | 0.98    | 13.33                                     | 1266                                                                                | 0.90    | 12.18                                     |
| 1309                                                                                | 0.89    | 12.13                                     | 1904                                                                                | 0.98    | 13.36                                     | 1316                                                                                | 0.89    | 12.16                                     |
| 1359                                                                                | 0.90    | 12.18                                     | 1954                                                                                | 0.98    | 13.39                                     | 1366                                                                                | 0.89    | 12.07                                     |
| 1409                                                                                | 0.90    | 12.23                                     | 2074                                                                                | 0.97    | 13.20                                     | 1416                                                                                | 0.89    | 12.06                                     |
| 1459                                                                                | 0.90    | 12.18                                     | 2124                                                                                | 0.95    | 12.97                                     | 1466                                                                                | 0.90    | 12.30                                     |
| 1509                                                                                | 0.90    | 12.23                                     | 2175                                                                                | 0.96    | 13.01                                     | 1516                                                                                | 0.89    | 12.06                                     |
| 1559                                                                                | 0.91    | 12.31                                     | 2225                                                                                | 0.94    | 12.77                                     | 1566                                                                                | 0.88    | 12.01                                     |
| 1609                                                                                | 0.91    | 12.32                                     | 2275                                                                                | 0.93    | 12.65                                     | 1616                                                                                | 0.84    | 11.41                                     |
| 1659                                                                                | 0.89    | 12.07                                     | 2325                                                                                | 0.93    | 12.59                                     | 1666                                                                                | 0.82    | 11.14                                     |
| 1709                                                                                | 0.89    | 12.06                                     | 2375                                                                                | 0.92    | 12.51                                     | 1716                                                                                | 0.81    | 10.98                                     |
| 1759                                                                                | 0.90    | 12.29                                     | 2425                                                                                | 0.92    | 12.52                                     | 1766                                                                                | 0.81    | 10.97                                     |
| 1809                                                                                | 0.89    | 12.13                                     | 2475                                                                                | 0.92    | 12.47                                     | 1816                                                                                | 0.84    | 11.45                                     |

**Table S3.** Continued.

| $p_{\text{CO}_2} = 3.49 \text{ kPa}$<br>$p_{\text{H}_2\text{O}} = 2.39 \text{ kPa}$ |         |                                           | $p_{\text{CO}_2} = 34.9 \text{ kPa}$<br>$p_{\text{H}_2\text{O}} = 2.21 \text{ kPa}$ |         |                                           | $p_{\text{CO}_2} = 3.49 \text{ kPa}$<br>$p_{\text{H}_2\text{O}} = 2.21 \text{ kPa}$ |         |                                           |
|-------------------------------------------------------------------------------------|---------|-------------------------------------------|-------------------------------------------------------------------------------------|---------|-------------------------------------------|-------------------------------------------------------------------------------------|---------|-------------------------------------------|
| Cycle                                                                               | $n/n_0$ | $n^{\text{ads}}$<br>/mmol g <sup>-1</sup> | Cycle                                                                               | $n/n_0$ | $n^{\text{ads}}$<br>/mmol g <sup>-1</sup> | Cycle                                                                               | $n/n_0$ | $n^{\text{ads}}$<br>/mmol g <sup>-1</sup> |
| 1859                                                                                | 0.89    | 12.16                                     | 2525                                                                                | 0.92    | 12.47                                     | 1866                                                                                | 0.85    | 11.52                                     |
| 1909                                                                                | 0.88    | 12.00                                     | 2575                                                                                | 0.91    | 12.33                                     | 1916                                                                                | 0.84    | 11.47                                     |
| 1959                                                                                | 0.90    | 12.26                                     | 2625                                                                                | 0.93    | 12.58                                     | 1966                                                                                | 0.82    | 11.19                                     |
| 2413                                                                                | 0.90    | 12.17                                     | 2675                                                                                | 0.91    | 12.36                                     | 2016                                                                                | 0.82    | 11.16                                     |
| 2463                                                                                | 0.90    | 12.29                                     | 2725                                                                                | 0.91    | 12.38                                     | 2066                                                                                | 0.80    | 10.83                                     |
| 2513                                                                                | 0.90    | 12.17                                     | 2775                                                                                | 0.91    | 12.31                                     | 2116                                                                                | 0.81    | 11.04                                     |
| 2563                                                                                | 0.88    | 11.91                                     | 2826                                                                                | 0.92    | 12.45                                     | 2166                                                                                | 0.79    | 10.72                                     |
| 2613                                                                                | 0.88    | 11.93                                     | 2876                                                                                | 0.91    | 12.38                                     | 2216                                                                                | 0.78    | 10.62                                     |
| 2663                                                                                | 0.89    | 12.04                                     | 2926                                                                                | 0.91    | 12.37                                     | 2266                                                                                | 0.79    | 10.78                                     |
| 2713                                                                                | 0.88    | 12.01                                     | 2976                                                                                | 0.91    | 12.36                                     | 2316                                                                                | 0.82    | 11.09                                     |
| 2763                                                                                | 0.86    | 11.76                                     | 3026                                                                                | 0.90    | 12.29                                     | 2366                                                                                | 0.84    | 11.41                                     |
| 2813                                                                                | 0.86    | 11.73                                     | 3076                                                                                | 0.90    | 12.27                                     | 2416                                                                                | 0.82    | 11.18                                     |
| 2863                                                                                | 0.86    | 11.65                                     | 3135                                                                                | 0.91    | 12.37                                     | 2466                                                                                | 0.84    | 11.45                                     |
| 2913                                                                                | 0.85    | 11.56                                     | 3185                                                                                | 0.90    | 12.20                                     | 2516                                                                                | 0.82    | 11.09                                     |
| 2963                                                                                | 0.86    | 11.63                                     | 3235                                                                                | 0.88    | 11.92                                     | 2566                                                                                | 0.82    | 11.09                                     |
| 3013                                                                                | 0.85    | 11.60                                     | 3285                                                                                | 0.88    | 11.99                                     | 2616                                                                                | 0.81    | 11.03                                     |
| 3063                                                                                | 0.85    | 11.56                                     | 3335                                                                                | 0.89    | 12.16                                     | 2666                                                                                | 0.83    | 11.34                                     |
| 3113                                                                                | 0.84    | 11.46                                     | 3385                                                                                | 0.89    | 12.08                                     | 2716                                                                                | 0.83    | 11.34                                     |
| 3163                                                                                | 0.84    | 11.39                                     | 3435                                                                                | 0.87    | 11.87                                     | 2766                                                                                | 0.80    | 10.92                                     |
| 3213                                                                                | 0.83    | 11.35                                     | 3485                                                                                | 0.87    | 11.87                                     | 2816                                                                                | 0.80    | 10.88                                     |
| 3263                                                                                | 0.83    | 11.32                                     | 3535                                                                                | 0.87    | 11.81                                     | 2866                                                                                | 0.77    | 10.42                                     |
| 3313                                                                                | 0.83    | 11.28                                     | 3585                                                                                | 0.85    | 11.61                                     | 2916                                                                                | 0.77    | 10.45                                     |
| 3363                                                                                | 0.83    | 11.28                                     | 3635                                                                                | 0.85    | 11.55                                     | 2966                                                                                | 0.77    | 10.51                                     |
| 3413                                                                                | 0.84    | 11.38                                     | 3685                                                                                | 0.86    | 11.69                                     | 3016                                                                                | 0.77    | 10.50                                     |
| 3463                                                                                | 0.84    | 11.44                                     | 3735                                                                                | 0.86    | 11.69                                     | 3066                                                                                | 0.77    | 10.45                                     |
| 3513                                                                                | 0.83    | 11.29                                     | 3791                                                                                | 0.86    | 11.73                                     | 3116                                                                                | 0.76    | 10.32                                     |
| 3563                                                                                | 0.82    | 11.21                                     | 3841                                                                                | 0.85    | 11.62                                     | 3166                                                                                | 0.75    | 10.15                                     |
| 3613                                                                                | 0.83    | 11.29                                     | 3896                                                                                | 0.85    | 11.52                                     | 3216                                                                                | 0.72    | 9.79                                      |
| 3663                                                                                | 0.84    | 11.40                                     | 3946                                                                                | 0.84    | 11.42                                     | 3266                                                                                | 0.74    | 10.11                                     |
| 3713                                                                                | 0.84    | 11.41                                     | 3996                                                                                | 0.84    | 11.47                                     | 3316                                                                                | 0.74    | 10.12                                     |
| 3763                                                                                | 0.83    | 11.32                                     | 4046                                                                                | 0.84    | 11.38                                     | 3366                                                                                | 0.70    | 9.55                                      |
| 3813                                                                                | 0.83    | 11.25                                     | 4096                                                                                | 0.85    | 11.50                                     | 3416                                                                                | 0.68    | 9.24                                      |
| 3863                                                                                | 0.81    | 11.05                                     | 4340                                                                                | 0.84    | 11.39                                     | 3466                                                                                | 0.67    | 9.17                                      |
| 3913                                                                                | 0.81    | 10.96                                     | 4390                                                                                | 0.83    | 11.34                                     | 3516                                                                                | 0.68    | 9.22                                      |
| 3963                                                                                | 0.80    | 10.86                                     | 4440                                                                                | 0.83    | 11.23                                     | 3566                                                                                | 0.68    | 9.31                                      |
| 4013                                                                                | 0.79    | 10.81                                     | 4490                                                                                | 0.81    | 10.95                                     | 3616                                                                                | 0.68    | 9.29                                      |

**Table S3.** Continued.

| $p_{\text{CO}_2} = 3.49 \text{ kPa}$<br>$p_{\text{H}_2\text{O}} = 2.39 \text{ kPa}$ |         |                                           | $p_{\text{CO}_2} = 34.9 \text{ kPa}$<br>$p_{\text{H}_2\text{O}} = 2.21 \text{ kPa}$ |         |                                           | $p_{\text{CO}_2} = 3.49 \text{ kPa}$<br>$p_{\text{H}_2\text{O}} = 2.21 \text{ kPa}$ |         |                                           |
|-------------------------------------------------------------------------------------|---------|-------------------------------------------|-------------------------------------------------------------------------------------|---------|-------------------------------------------|-------------------------------------------------------------------------------------|---------|-------------------------------------------|
| Cycle                                                                               | $n/n_0$ | $n^{\text{ads}}$<br>/mmol g <sup>-1</sup> | Cycle                                                                               | $n/n_0$ | $n^{\text{ads}}$<br>/mmol g <sup>-1</sup> | Cycle                                                                               | $n/n_0$ | $n^{\text{ads}}$<br>/mmol g <sup>-1</sup> |
| 4063                                                                                | 0.80    | 10.84                                     | 4540                                                                                | 0.82    | 11.10                                     | 3666                                                                                | 0.63    | 8.56                                      |
| 4113                                                                                | 0.79    | 10.75                                     | 4590                                                                                | 0.81    | 11.06                                     | 3716                                                                                | 0.64    | 8.76                                      |
| 4163                                                                                | 0.78    | 10.67                                     | 4640                                                                                | 0.81    | 11.06                                     | 3766                                                                                | 0.66    | 8.99                                      |
| 4213                                                                                | 0.79    | 10.79                                     | 4690                                                                                | 0.79    | 10.79                                     | 3816                                                                                | 0.65    | 8.87                                      |
| 4263                                                                                | 0.79    | 10.73                                     | 4740                                                                                | 0.79    | 10.70                                     | 3866                                                                                | 0.66    | 8.93                                      |
| 4317                                                                                | 0.80    | 10.85                                     | 4790                                                                                | 0.78    | 10.67                                     | 3916                                                                                | 0.63    | 8.59                                      |
| 4367                                                                                | 0.80    | 10.88                                     | 4840                                                                                | 0.78    | 10.67                                     | 3966                                                                                | 0.67    | 9.10                                      |
| 4417                                                                                | 0.80    | 10.90                                     | 4890                                                                                | 0.79    | 10.69                                     | 4016                                                                                | 0.66    | 8.98                                      |
| 4467                                                                                | 0.79    | 10.79                                     | 5002                                                                                | 0.79    | 10.81                                     | 4066                                                                                | 0.65    | 8.82                                      |
| 4517                                                                                | 0.79    | 10.79                                     | 5052                                                                                | 0.81    | 10.96                                     | 4116                                                                                | 0.67    | 9.11                                      |
| 4567                                                                                | 0.79    | 10.79                                     | 5097                                                                                | 0.78    | 10.67                                     | 4166                                                                                | 0.67    | 9.11                                      |
| 4617                                                                                | 0.81    | 10.96                                     |                                                                                     |         |                                           | 4216                                                                                | 0.65    | 8.89                                      |
| 4669                                                                                | 0.81    | 10.98                                     |                                                                                     |         |                                           | 4266                                                                                | 0.65    | 8.86                                      |
| 4719                                                                                | 0.82    | 11.12                                     |                                                                                     |         |                                           | 4316                                                                                | 0.66    | 8.92                                      |
| 4769                                                                                | 0.80    | 10.85                                     |                                                                                     |         |                                           | 4366                                                                                | 0.66    | 8.92                                      |
| 4819                                                                                | 0.81    | 11.05                                     |                                                                                     |         |                                           | 4416                                                                                | 0.66    | 8.93                                      |
| 4869                                                                                | 0.82    | 11.10                                     |                                                                                     |         |                                           | 4466                                                                                | 0.67    | 9.12                                      |
| 4919                                                                                | 0.81    | 11.08                                     |                                                                                     |         |                                           | 4516                                                                                | 0.66    | 8.95                                      |
| 4969                                                                                | 0.80    | 10.85                                     |                                                                                     |         |                                           | 4566                                                                                | 0.63    | 8.62                                      |
| 5019                                                                                | 0.80    | 10.82                                     |                                                                                     |         |                                           | 4616                                                                                | 0.62    | 8.49                                      |
| 5069                                                                                | 0.80    | 10.83                                     |                                                                                     |         |                                           | 4666                                                                                | 0.63    | 8.54                                      |
| 5119                                                                                | 0.80    | 10.82                                     |                                                                                     |         |                                           | 4716                                                                                | 0.63    | 8.58                                      |
| 5169                                                                                | 0.79    | 10.78                                     |                                                                                     |         |                                           | 4766                                                                                | 0.65    | 8.90                                      |
|                                                                                     |         |                                           |                                                                                     |         |                                           | 4816                                                                                | 0.67    | 9.05                                      |
|                                                                                     |         |                                           |                                                                                     |         |                                           | 4866                                                                                | 0.65    | 8.85                                      |
|                                                                                     |         |                                           |                                                                                     |         |                                           | 4916                                                                                | 0.64    | 8.73                                      |
|                                                                                     |         |                                           |                                                                                     |         |                                           | 4966                                                                                | 0.65    | 8.82                                      |
|                                                                                     |         |                                           |                                                                                     |         |                                           | 5016                                                                                | 0.62    | 8.45                                      |
|                                                                                     |         |                                           |                                                                                     |         |                                           | 5066                                                                                | 0.61    | 8.32                                      |
|                                                                                     |         |                                           |                                                                                     |         |                                           | 5116                                                                                | 0.62    | 8.42                                      |
|                                                                                     |         |                                           |                                                                                     |         |                                           | 5166                                                                                | 0.64    | 8.66                                      |
|                                                                                     |         |                                           |                                                                                     |         |                                           | 5236                                                                                | 0.63    | 8.56                                      |

**Table S4. Zeolite 13X capacities for the wet gas regeneration experiments.**

| $p_{\text{CO}_2} = 3.49 \text{ kPa}$<br>$p_{\text{H}_2\text{O}} = 2.39 \text{ kPa}$ |         |                               | $p_{\text{CO}_2} = 34.9 \text{ kPa}$<br>$p_{\text{H}_2\text{O}} = 2.21 \text{ kPa}$ |         |                               | $p_{\text{CO}_2} = 3.49 \text{ kPa}$<br>$p_{\text{H}_2\text{O}} = 2.21 \text{ kPa}$ |         |                               |
|-------------------------------------------------------------------------------------|---------|-------------------------------|-------------------------------------------------------------------------------------|---------|-------------------------------|-------------------------------------------------------------------------------------|---------|-------------------------------|
| Cycle                                                                               | $n/n_0$ | $n^{\text{ads}}$<br>/mmol g-1 | Cycle                                                                               | $n/n_0$ | $n^{\text{ads}}$<br>/mmol g-1 | Cycle                                                                               | $n/n_0$ | $n^{\text{ads}}$<br>/mmol g-1 |
| 50                                                                                  | 1.00    | 13.60                         | 50                                                                                  | 1.00    | 13.55                         | 45                                                                                  | 0.99    | 13.51                         |
| 100                                                                                 | 0.98    | 13.33                         | 100                                                                                 | 0.98    | 13.32                         | 95                                                                                  | 0.95    | 12.86                         |
| 150                                                                                 | 0.95    | 12.86                         | 150                                                                                 | 0.95    | 12.90                         | 145                                                                                 | 0.91    | 12.31                         |
| 200                                                                                 | 0.92    | 12.46                         | 200                                                                                 | 0.94    | 12.81                         | 195                                                                                 | 0.86    | 11.68                         |
| 250                                                                                 | 0.96    | 13.01                         | 250                                                                                 | 0.96    | 13.10                         | 245                                                                                 | 0.80    | 10.85                         |
| 300                                                                                 | 0.95    | 12.85                         | 300                                                                                 | 0.94    | 12.75                         | 295                                                                                 | 0.80    | 10.90                         |
| 350                                                                                 | 0.93    | 12.60                         | 350                                                                                 | 0.95    | 12.91                         | 345                                                                                 | 0.81    | 10.99                         |
| 400                                                                                 | 0.93    | 12.67                         | 400                                                                                 | 0.94    | 12.81                         | 395                                                                                 | 0.79    | 10.74                         |
| 450                                                                                 | 0.92    | 12.46                         | 450                                                                                 | 0.95    | 12.94                         | 445                                                                                 | 0.78    | 10.66                         |
| 500                                                                                 | 0.91    | 12.38                         | 500                                                                                 | 0.95    | 12.90                         | 495                                                                                 | 0.74    | 10.10                         |
| 550                                                                                 | 0.90    | 12.18                         | 550                                                                                 | 0.96    | 13.00                         | 545                                                                                 | 0.73    | 9.91                          |
| 600                                                                                 | 0.87    | 11.77                         | 600                                                                                 | 0.91    | 12.44                         | 595                                                                                 | 0.72    | 9.75                          |
| 650                                                                                 | 0.85    | 11.55                         | 650                                                                                 | 0.93    | 12.63                         | 645                                                                                 | 0.71    | 9.63                          |
| 700                                                                                 | 0.89    | 12.13                         | 700                                                                                 | 0.92    | 12.50                         | 695                                                                                 | 0.69    | 9.44                          |
| 750                                                                                 | 0.86    | 11.74                         | 750                                                                                 | 0.92    | 12.54                         | 745                                                                                 | 0.68    | 9.27                          |
| 800                                                                                 | 0.85    | 11.53                         | 800                                                                                 | 0.90    | 12.29                         | 795                                                                                 | 0.70    | 9.57                          |
| 850                                                                                 | 0.88    | 11.97                         | 850                                                                                 | 0.91    | 12.32                         | 845                                                                                 | 0.69    | 9.44                          |
| 900                                                                                 | 0.88    | 12.03                         | 900                                                                                 | 0.91    | 12.32                         | 895                                                                                 | 0.68    | 9.27                          |
| 950                                                                                 | 0.89    | 12.14                         | 950                                                                                 | 0.91    | 12.33                         | 945                                                                                 | 0.66    | 8.98                          |
| 1000                                                                                | 0.89    | 12.07                         | 1000                                                                                | 0.91    | 12.34                         | 995                                                                                 | 0.66    | 8.97                          |
| 1050                                                                                | 0.91    | 12.33                         | 1050                                                                                | 0.91    | 12.32                         | 1045                                                                                | 0.64    | 8.69                          |
| 1100                                                                                | 0.88    | 11.99                         | 1100                                                                                | 0.91    | 12.44                         | 1095                                                                                | 0.66    | 8.93                          |
| 1150                                                                                | 0.90    | 12.23                         | 1150                                                                                | 0.90    | 12.30                         | 1145                                                                                | 0.64    | 8.68                          |
| 1200                                                                                | 0.90    | 12.22                         | 1200                                                                                | 0.90    | 12.22                         | 1195                                                                                | 0.64    | 8.72                          |
| 1250                                                                                | 0.84    | 11.37                         | 1250                                                                                | 0.93    | 12.59                         | 1245                                                                                | 0.63    | 8.54                          |
| 1300                                                                                | 0.86    | 11.71                         | 1300                                                                                | 0.90    | 12.23                         | 1295                                                                                | 0.63    | 8.56                          |
| 1350                                                                                | 0.87    | 11.84                         | 1350                                                                                | 0.87    | 11.86                         | 1345                                                                                | 0.63    | 8.56                          |
| 1400                                                                                | 0.88    | 11.91                         | 1400                                                                                | 0.88    | 12.00                         | 1395                                                                                | 0.62    | 8.42                          |
| 1450                                                                                | 0.87    | 11.87                         | 1450                                                                                | 0.88    | 11.94                         | 1445                                                                                | 0.61    | 8.31                          |
| 1500                                                                                | 0.87    | 11.78                         | 1500                                                                                | 0.87    | 11.89                         | 1495                                                                                | 0.61    | 8.28                          |
| 1580                                                                                | 0.86    | 11.75                         | 1550                                                                                | 0.87    | 11.79                         | 1545                                                                                | 0.60    | 8.16                          |
| 1630                                                                                | 0.84    | 11.45                         | 1600                                                                                | 0.86    | 11.71                         | 1595                                                                                | 0.58    | 7.90                          |
| 1680                                                                                | 0.84    | 11.38                         | 1650                                                                                | 0.85    | 11.53                         | 1645                                                                                | 0.59    | 7.97                          |
| 1730                                                                                | 0.84    | 11.38                         | 1700                                                                                | 0.84    | 11.48                         | 1695                                                                                | 0.57    | 7.73                          |
| 1780                                                                                | 0.81    | 11.08                         | 1750                                                                                | 0.83    | 11.34                         | 1745                                                                                | 0.58    | 7.85                          |
| 1830                                                                                | 0.80    | 10.91                         | 1800                                                                                | 0.83    | 11.32                         | 1795                                                                                | 0.56    | 7.65                          |
| 1880                                                                                | 0.81    | 10.96                         | 1850                                                                                | 0.84    | 11.48                         | 1845                                                                                | 0.59    | 7.96                          |

**Table S4.** Continued.

| $p_{\text{CO}_2} = 3.49 \text{ kPa}$<br>$p_{\text{H}_2\text{O}} = 2.39 \text{ kPa}$ |         |                                           | $p_{\text{CO}_2} = 34.9 \text{ kPa}$<br>$p_{\text{H}_2\text{O}} = 2.21 \text{ kPa}$ |         |                                           | $p_{\text{CO}_2} = 3.49 \text{ kPa}$<br>$p_{\text{H}_2\text{O}} = 2.21 \text{ kPa}$ |         |                                           |
|-------------------------------------------------------------------------------------|---------|-------------------------------------------|-------------------------------------------------------------------------------------|---------|-------------------------------------------|-------------------------------------------------------------------------------------|---------|-------------------------------------------|
| Cycle                                                                               | $n/n_0$ | $n^{\text{ads}}$<br>/mmol g <sup>-1</sup> | Cycle                                                                               | $n/n_0$ | $n^{\text{ads}}$<br>/mmol g <sup>-1</sup> | Cycle                                                                               | $n/n_0$ | $n^{\text{ads}}$<br>/mmol g <sup>-1</sup> |
| 1930                                                                                | 0.82    | 11.09                                     | 1900                                                                                | 0.85    | 11.53                                     | 1895                                                                                | 0.57    | 7.70                                      |
| 2000                                                                                | 0.80    | 10.83                                     | 1950                                                                                | 0.85    | 11.51                                     | 1945                                                                                | 0.57    | 7.75                                      |
| 2050                                                                                | 0.78    | 10.63                                     | 2000                                                                                | 0.82    | 11.12                                     | 1995                                                                                | 0.56    | 7.58                                      |
| 2100                                                                                | 0.75    | 10.26                                     | 2050                                                                                | 0.81    | 11.06                                     | 2045                                                                                | 0.54    | 7.33                                      |
| 2150                                                                                | 0.76    | 10.38                                     | 2100                                                                                | 0.82    | 11.19                                     | 2095                                                                                | 0.57    | 7.72                                      |
| 2200                                                                                | 0.80    | 10.90                                     | 2150                                                                                | 0.82    | 11.12                                     | 2145                                                                                | 0.54    | 7.41                                      |
| 2250                                                                                | 0.81    | 10.97                                     | 2201                                                                                | 0.78    | 10.65                                     | 2195                                                                                | 0.55    | 7.55                                      |
| 2300                                                                                | 0.81    | 11.08                                     | 2251                                                                                | 0.81    | 11.06                                     | 2245                                                                                | 0.56    | 7.58                                      |
| 2350                                                                                | 0.79    | 10.76                                     | 2302                                                                                | 0.82    | 11.15                                     | 2295                                                                                | 0.56    | 7.56                                      |
| 2400                                                                                | 0.80    | 10.91                                     | 2352                                                                                | 0.82    | 11.15                                     | 2345                                                                                | 0.55    | 7.52                                      |
| 2455                                                                                | 0.77    | 10.46                                     | 2402                                                                                | 0.82    | 11.22                                     | 2395                                                                                | 0.55    | 7.50                                      |
| 2505                                                                                | 0.76    | 10.33                                     | 2452                                                                                | 0.81    | 11.06                                     | 2445                                                                                | 0.55    | 7.50                                      |
| 2555                                                                                | 0.75    | 10.17                                     | 2502                                                                                | 0.82    | 11.16                                     | 2495                                                                                | 0.55    | 7.42                                      |
| 2609                                                                                | 0.73    | 9.94                                      | 2552                                                                                | 0.82    | 11.19                                     | 2545                                                                                | 0.54    | 7.33                                      |
| 2659                                                                                | 0.71    | 9.63                                      | 2602                                                                                | 0.83    | 11.22                                     | 2595                                                                                | 0.52    | 7.12                                      |
| 2709                                                                                | 0.72    | 9.79                                      | 2652                                                                                | 0.83    | 11.29                                     | 2645                                                                                | 0.54    | 7.30                                      |
| 2759                                                                                | 0.71    | 9.71                                      | 2702                                                                                | 0.83    | 11.27                                     | 2695                                                                                | 0.52    | 7.13                                      |
| 2809                                                                                | 0.71    | 9.65                                      | 2752                                                                                | 0.83    | 11.25                                     | 2745                                                                                | 0.53    | 7.18                                      |
| 2859                                                                                | 0.72    | 9.84                                      | 2802                                                                                | 0.82    | 11.08                                     | 2795                                                                                | 0.51    | 6.93                                      |
| 2909                                                                                | 0.71    | 9.66                                      | 2852                                                                                | 0.80    | 10.85                                     | 2845                                                                                | 0.51    | 6.95                                      |
| 2959                                                                                | 0.72    | 9.83                                      | 2902                                                                                | 0.80    | 10.92                                     | 2895                                                                                | 0.50    | 6.83                                      |
| 3009                                                                                | 0.72    | 9.77                                      | 2952                                                                                | 0.82    | 11.13                                     | 2946                                                                                | 0.51    | 6.87                                      |
| 3059                                                                                | 0.71    | 9.65                                      | 3003                                                                                | 0.80    | 10.92                                     | 2996                                                                                | 0.50    | 6.82                                      |
| 3109                                                                                | 0.72    | 9.81                                      | 3053                                                                                | 0.82    | 11.09                                     | 3046                                                                                | 0.50    | 6.84                                      |
| 3159                                                                                | 0.73    | 9.92                                      | 3103                                                                                | 0.81    | 11.06                                     | 3096                                                                                | 0.51    | 6.93                                      |
| 3209                                                                                | 0.70    | 9.56                                      | 3153                                                                                | 0.81    | 10.97                                     | 3146                                                                                | 0.52    | 7.05                                      |
| 3259                                                                                | 0.71    | 9.61                                      | 3203                                                                                | 0.81    | 10.99                                     | 3196                                                                                | 0.52    | 7.02                                      |
| 3309                                                                                | 0.71    | 9.61                                      | 3253                                                                                | 0.80    | 10.94                                     | 3246                                                                                | 0.51    | 6.96                                      |
| 3359                                                                                | 0.69    | 9.42                                      | 3303                                                                                | 0.81    | 10.97                                     | 3296                                                                                | 0.51    | 6.99                                      |
| 3409                                                                                | 0.70    | 9.57                                      | 3353                                                                                | 0.81    | 10.98                                     | 3346                                                                                | 0.51    | 6.92                                      |
| 3459                                                                                | 0.69    | 9.43                                      | 3403                                                                                | 0.80    | 10.93                                     | 3396                                                                                | 0.49    | 6.71                                      |
| 3509                                                                                | 0.67    | 9.16                                      | 3448                                                                                | 0.80    | 10.85                                     | 3446                                                                                | 0.50    | 6.75                                      |
| 3559                                                                                | 0.67    | 9.09                                      | 3498                                                                                | 0.80    | 10.86                                     | 3496                                                                                | 0.50    | 6.81                                      |
| 3609                                                                                | 0.68    | 9.29                                      | 3549                                                                                | 0.79    | 10.81                                     | 3546                                                                                | 0.50    | 6.79                                      |
| 3659                                                                                | 0.67    | 9.18                                      | 3599                                                                                | 0.80    | 10.91                                     | 3596                                                                                | 0.49    | 6.70                                      |
| 3709                                                                                | 0.66    | 9.00                                      | 3649                                                                                | 0.80    | 10.94                                     | 3646                                                                                | 0.50    | 6.86                                      |

**Table S4.** Continued.

| $p_{\text{CO}_2} = 3.49 \text{ kPa}$<br>$p_{\text{H}_2\text{O}} = 2.39 \text{ kPa}$ |         |                                           | $p_{\text{CO}_2} = 34.9 \text{ kPa}$<br>$p_{\text{H}_2\text{O}} = 2.21 \text{ kPa}$ |         |                                           | $p_{\text{CO}_2} = 3.49 \text{ kPa}$<br>$p_{\text{H}_2\text{O}} = 2.21 \text{ kPa}$ |         |                                           |
|-------------------------------------------------------------------------------------|---------|-------------------------------------------|-------------------------------------------------------------------------------------|---------|-------------------------------------------|-------------------------------------------------------------------------------------|---------|-------------------------------------------|
| Cycle                                                                               | $n/n_0$ | $n^{\text{ads}}$<br>/mmol g <sup>-1</sup> | Cycle                                                                               | $n/n_0$ | $n^{\text{ads}}$<br>/mmol g <sup>-1</sup> | Cycle                                                                               | $n/n_0$ | $n^{\text{ads}}$<br>/mmol g <sup>-1</sup> |
| 3759                                                                                | 0.67    | 9.13                                      | 3699                                                                                | 0.81    | 10.99                                     | 3696                                                                                | 0.51    | 6.93                                      |
| 3809                                                                                | 0.67    | 9.15                                      | 3749                                                                                | 0.79    | 10.75                                     | 3746                                                                                | 0.49    | 6.68                                      |
| 3859                                                                                | 0.68    | 9.20                                      | 3799                                                                                | 0.79    | 10.73                                     | 3796                                                                                | 0.49    | 6.63                                      |
| 3909                                                                                | 0.69    | 9.38                                      | 3849                                                                                | 0.79    | 10.73                                     | 3846                                                                                | 0.49    | 6.67                                      |
| 3959                                                                                | 0.70    | 9.46                                      | 3899                                                                                | 0.80    | 10.87                                     | 3896                                                                                | 0.49    | 6.66                                      |
| 4009                                                                                | 0.66    | 9.02                                      | 3949                                                                                | 0.80    | 10.93                                     | 3946                                                                                | 0.49    | 6.60                                      |
| 4059                                                                                | 0.65    | 8.80                                      | 3999                                                                                | 0.80    | 10.86                                     | 3996                                                                                | 0.51    | 6.92                                      |
| 4109                                                                                | 0.67    | 9.09                                      | 4052                                                                                | 0.80    | 10.91                                     | 4046                                                                                | 0.48    | 6.48                                      |
| 4159                                                                                | 0.66    | 8.94                                      | 4102                                                                                | 0.79    | 10.71                                     | 4096                                                                                | 0.48    | 6.47                                      |
| 4209                                                                                | 0.67    | 9.05                                      | 4154                                                                                | 0.75    | 10.21                                     | 4146                                                                                | 0.50    | 6.75                                      |
| 4259                                                                                | 0.65    | 8.84                                      | 4204                                                                                | 0.74    | 10.02                                     | 4196                                                                                | 0.49    | 6.63                                      |
| 4309                                                                                | 0.68    | 9.25                                      | 4254                                                                                | 0.74    | 10.08                                     | 4246                                                                                | 0.49    | 6.65                                      |
| 4359                                                                                | 0.66    | 8.98                                      | 4304                                                                                | 0.75    | 10.17                                     | 4296                                                                                | 0.48    | 6.50                                      |
| 4409                                                                                | 0.66    | 9.03                                      | 4354                                                                                | 0.74    | 10.05                                     | 4346                                                                                | 0.49    | 6.61                                      |
| 4459                                                                                | 0.66    | 9.02                                      | 4404                                                                                | 0.73    | 9.99                                      | 4396                                                                                | 0.47    | 6.41                                      |
| 4509                                                                                | 0.61    | 8.30                                      | 4454                                                                                | 0.74    | 10.07                                     | 4446                                                                                | 0.48    | 6.52                                      |
| 4559                                                                                | 0.64    | 8.72                                      | 4504                                                                                | 0.75    | 10.20                                     | 4496                                                                                | 0.48    | 6.47                                      |
| 4609                                                                                | 0.60    | 8.15                                      | 4554                                                                                | 0.74    | 10.05                                     | 4546                                                                                | 0.48    | 6.47                                      |
| 4659                                                                                | 0.63    | 8.59                                      | 4604                                                                                | 0.73    | 9.94                                      | 4596                                                                                | 0.47    | 6.45                                      |
| 4709                                                                                | 0.59    | 8.08                                      | 4654                                                                                | 0.74    | 10.03                                     | 4646                                                                                | 0.47    | 6.40                                      |
| 4759                                                                                | 0.62    | 8.48                                      | 4704                                                                                | 0.74    | 10.00                                     | 4696                                                                                | 0.48    | 6.47                                      |
| 4809                                                                                | 0.61    | 8.26                                      | 4754                                                                                | 0.75    | 10.20                                     | 4746                                                                                | 0.48    | 6.55                                      |
| 4859                                                                                | 0.62    | 8.48                                      | 4804                                                                                | 0.75    | 10.23                                     | 4796                                                                                | 0.48    | 6.49                                      |
| 4909                                                                                | 0.67    | 9.12                                      | 4854                                                                                | 0.75    | 10.14                                     | 4846                                                                                | 0.47    | 6.43                                      |
| 4959                                                                                | 0.63    | 8.55                                      | 4904                                                                                | 0.74    | 10.01                                     | 4896                                                                                | 0.48    | 6.46                                      |
| 5009                                                                                | 0.67    | 9.10                                      | 4954                                                                                | 0.70    | 9.47                                      | 4946                                                                                | 0.47    | 6.34                                      |
| 5059                                                                                | 0.66    | 8.93                                      | 5004                                                                                | 0.72    | 9.80                                      | 4996                                                                                | 0.47    | 6.42                                      |
| 5109                                                                                | 0.68    | 9.26                                      | 5054                                                                                | 0.69    | 9.33                                      | 5046                                                                                | 0.46    | 6.32                                      |
| 5159                                                                                | 0.65    | 8.82                                      | 5069                                                                                | 0.66    | 8.98                                      | 5096                                                                                | 0.48    | 6.50                                      |
| 5209                                                                                | 0.66    | 9.03                                      |                                                                                     |         |                                           | 5146                                                                                | 0.48    | 6.46                                      |
| 5259                                                                                | 0.64    | 8.73                                      |                                                                                     |         |                                           | 5186                                                                                | 0.48    | 6.54                                      |
| 5309                                                                                | 0.63    | 8.63                                      |                                                                                     |         |                                           |                                                                                     |         |                                           |
| 5359                                                                                | 0.65    | 8.80                                      |                                                                                     |         |                                           |                                                                                     |         |                                           |
| 5379                                                                                | 0.63    | 8.61                                      |                                                                                     |         |                                           |                                                                                     |         |                                           |

**Table S5. 2.2 nm pore silica capacities for the dry gas regeneration experiments.**

| $p_{\text{CO}_2} = 3.49 \text{ kPa}$<br>$p_{\text{H}_2\text{O}} = 2.39 \text{ kPa}$ |         |                                           | $p_{\text{CO}_2} = 34.9 \text{ kPa}$<br>$p_{\text{H}_2\text{O}} = 2.21 \text{ kPa}$ |         |                                           | $p_{\text{CO}_2} = 3.49 \text{ kPa}$<br>$p_{\text{H}_2\text{O}} = 2.21 \text{ kPa}$ |         |                                           |
|-------------------------------------------------------------------------------------|---------|-------------------------------------------|-------------------------------------------------------------------------------------|---------|-------------------------------------------|-------------------------------------------------------------------------------------|---------|-------------------------------------------|
| Cycle                                                                               | $n/n_0$ | $n^{\text{ads}}$<br>/mmol g <sup>-1</sup> | Cycle                                                                               | $n/n_0$ | $n^{\text{ads}}$<br>/mmol g <sup>-1</sup> | Cycle                                                                               | $n/n_0$ | $n^{\text{ads}}$<br>/mmol g <sup>-1</sup> |
| 50                                                                                  | 1.00    | 5.99                                      | 50                                                                                  | 1.00    | 6.00                                      | 45                                                                                  | 1.00    | 5.99                                      |
| 100                                                                                 | 0.99    | 5.96                                      | 100                                                                                 | 1.00    | 6.00                                      | 95                                                                                  | 1.01    | 6.08                                      |
| 150                                                                                 | 0.99    | 5.92                                      | 221                                                                                 | 1.00    | 6.01                                      | 145                                                                                 | 1.02    | 6.10                                      |
| 200                                                                                 | 0.98    | 5.87                                      | 271                                                                                 | 1.01    | 6.03                                      | 195                                                                                 | 0.98    | 5.88                                      |
| 250                                                                                 | 0.98    | 5.86                                      | 321                                                                                 | 1.01    | 6.03                                      | 245                                                                                 | 0.97    | 5.83                                      |
| 300                                                                                 | 0.98    | 5.85                                      | 371                                                                                 | 1.01    | 6.03                                      | 316                                                                                 | 0.97    | 5.84                                      |
| 350                                                                                 | 0.98    | 5.85                                      | 421                                                                                 | 1.01    | 6.03                                      | 366                                                                                 | 0.96    | 5.77                                      |
| 400                                                                                 | 0.97    | 5.83                                      | 471                                                                                 | 1.01    | 6.03                                      | 416                                                                                 | 0.92    | 5.52                                      |
| 450                                                                                 | 0.97    | 5.83                                      | 615                                                                                 | 1.01    | 6.06                                      | 466                                                                                 | 0.95    | 5.68                                      |
| 500                                                                                 | 0.97    | 5.84                                      | 665                                                                                 | 1.01    | 6.06                                      | 516                                                                                 | 0.90    | 5.39                                      |
| 550                                                                                 | 0.97    | 5.81                                      | 974                                                                                 | 1.01    | 6.06                                      | 566                                                                                 | 0.91    | 5.43                                      |
| 600                                                                                 | 0.97    | 5.83                                      | 1024                                                                                | 1.01    | 6.06                                      | 616                                                                                 | 0.90    | 5.40                                      |
| 650                                                                                 | 0.97    | 5.82                                      | 1074                                                                                | 1.02    | 6.09                                      | 666                                                                                 | 0.90    | 5.37                                      |
| 700                                                                                 | 0.97    | 5.82                                      | 1124                                                                                | 1.01    | 6.08                                      | 716                                                                                 | 0.89    | 5.36                                      |
| 750                                                                                 | 0.97    | 5.82                                      | 1174                                                                                | 1.01    | 6.08                                      | 766                                                                                 | 0.90    | 5.39                                      |
| 809                                                                                 | 0.97    | 5.83                                      | 1404                                                                                | 1.02    | 6.10                                      | 816                                                                                 | 0.95    | 5.70                                      |
| 859                                                                                 | 0.97    | 5.82                                      | 1454                                                                                | 1.02    | 6.10                                      | 866                                                                                 | 0.94    | 5.61                                      |
| 909                                                                                 | 0.97    | 5.80                                      | 1504                                                                                | 1.02    | 6.10                                      | 916                                                                                 | 0.93    | 5.60                                      |
| 959                                                                                 | 0.97    | 5.81                                      | 1554                                                                                | 1.02    | 6.10                                      | 966                                                                                 | 0.91    | 5.45                                      |
| 1009                                                                                | 0.96    | 5.78                                      | 1604                                                                                | 1.02    | 6.10                                      | 1016                                                                                | 0.92    | 5.54                                      |
| 1059                                                                                | 0.96    | 5.78                                      | 1654                                                                                | 1.02    | 6.10                                      | 1066                                                                                | 0.90    | 5.41                                      |
| 1109                                                                                | 0.97    | 5.81                                      | 1704                                                                                | 1.02    | 6.10                                      | 1116                                                                                | 0.88    | 5.27                                      |
| 1159                                                                                | 0.97    | 5.81                                      | 1754                                                                                | 1.02    | 6.10                                      | 1166                                                                                | 0.87    | 5.19                                      |
| 1209                                                                                | 0.96    | 5.78                                      | 1804                                                                                | 1.02    | 6.10                                      | 1216                                                                                | 0.89    | 5.33                                      |
| 1259                                                                                | 0.96    | 5.76                                      | 1854                                                                                | 1.02    | 6.10                                      | 1266                                                                                | 0.90    | 5.37                                      |
| 1309                                                                                | 0.96    | 5.75                                      | 1904                                                                                | 1.02    | 6.10                                      | 1316                                                                                | 0.90    | 5.42                                      |
| 1359                                                                                | 0.96    | 5.77                                      | 1954                                                                                | 1.02    | 6.11                                      | 1366                                                                                | 0.87    | 5.24                                      |
| 1409                                                                                | 0.96    | 5.76                                      | 2074                                                                                | 1.02    | 6.13                                      | 1416                                                                                | 0.89    | 5.34                                      |
| 1459                                                                                | 0.96    | 5.77                                      | 2124                                                                                | 1.02    | 6.13                                      | 1466                                                                                | 0.93    | 5.58                                      |
| 1509                                                                                | 0.96    | 5.75                                      | 2175                                                                                | 1.02    | 6.13                                      | 1516                                                                                | 0.88    | 5.25                                      |
| 1559                                                                                | 0.96    | 5.77                                      | 2225                                                                                | 1.02    | 6.12                                      | 1566                                                                                | 0.90    | 5.41                                      |
| 1609                                                                                | 0.96    | 5.75                                      | 2275                                                                                | 1.02    | 6.12                                      | 1616                                                                                | 0.95    | 5.68                                      |
| 1659                                                                                | 0.96    | 5.74                                      | 2325                                                                                | 1.02    | 6.12                                      | 1666                                                                                | 0.94    | 5.64                                      |
| 1709                                                                                | 0.95    | 5.72                                      | 2375                                                                                | 1.02    | 6.12                                      | 1716                                                                                | 0.94    | 5.65                                      |
| 1759                                                                                | 0.96    | 5.75                                      | 2425                                                                                | 1.02    | 6.12                                      | 1766                                                                                | 0.90    | 5.42                                      |
| 1809                                                                                | 0.96    | 5.73                                      | 2475                                                                                | 1.02    | 6.12                                      | 1816                                                                                | 0.87    | 5.24                                      |
| 1859                                                                                | 0.96    | 5.73                                      | 2525                                                                                | 1.02    | 6.12                                      | 1866                                                                                | 0.85    | 5.09                                      |

**Table S5.** Continued.

| $p_{\text{CO}_2} = 3.49 \text{ kPa}$<br>$p_{\text{H}_2\text{O}} = 2.39 \text{ kPa}$ |         |                                           | $p_{\text{CO}_2} = 34.9 \text{ kPa}$<br>$p_{\text{H}_2\text{O}} = 2.21 \text{ kPa}$ |         |                                           | $p_{\text{CO}_2} = 3.49 \text{ kPa}$<br>$p_{\text{H}_2\text{O}} = 2.21 \text{ kPa}$ |         |                                           |
|-------------------------------------------------------------------------------------|---------|-------------------------------------------|-------------------------------------------------------------------------------------|---------|-------------------------------------------|-------------------------------------------------------------------------------------|---------|-------------------------------------------|
| Cycle                                                                               | $n/n_0$ | $n^{\text{ads}}$<br>/mmol g <sup>-1</sup> | Cycle                                                                               | $n/n_0$ | $n^{\text{ads}}$<br>/mmol g <sup>-1</sup> | Cycle                                                                               | $n/n_0$ | $n^{\text{ads}}$<br>/mmol g <sup>-1</sup> |
| 1909                                                                                | 0.95    | 5.69                                      | 2575                                                                                | 1.02    | 6.12                                      | 1916                                                                                | 0.89    | 5.32                                      |
| 1959                                                                                | 0.96    | 5.76                                      | 2625                                                                                | 1.02    | 6.12                                      | 1966                                                                                | 0.90    | 5.40                                      |
| 2413                                                                                | 0.96    | 5.73                                      | 2675                                                                                | 1.02    | 6.13                                      | 2016                                                                                | 0.89    | 5.33                                      |
| 2463                                                                                | 0.95    | 5.68                                      | 2725                                                                                | 1.02    | 6.13                                      | 2066                                                                                | 0.86    | 5.13                                      |
| 2513                                                                                | 0.95    | 5.68                                      | 2775                                                                                | 1.02    | 6.13                                      | 2116                                                                                | 0.87    | 5.22                                      |
| 2563                                                                                | 0.94    | 5.61                                      | 2826                                                                                | 1.02    | 6.14                                      | 2166                                                                                | 0.89    | 5.36                                      |
| 2613                                                                                | 0.94    | 5.62                                      | 2876                                                                                | 1.02    | 6.13                                      | 2216                                                                                | 0.86    | 5.16                                      |
| 2663                                                                                | 0.94    | 5.64                                      | 2926                                                                                | 1.02    | 6.14                                      | 2266                                                                                | 0.87    | 5.19                                      |
| 2713                                                                                | 0.94    | 5.61                                      | 2976                                                                                | 1.02    | 6.14                                      | 2316                                                                                | 0.86    | 5.14                                      |
| 2763                                                                                | 0.93    | 5.57                                      | 3026                                                                                | 1.02    | 6.14                                      | 2366                                                                                | 0.86    | 5.14                                      |
| 2813                                                                                | 0.92    | 5.54                                      | 3076                                                                                | 1.02    | 6.14                                      | 2416                                                                                | 0.82    | 4.94                                      |
| 2863                                                                                | 0.92    | 5.53                                      | 3135                                                                                | 1.03    | 6.15                                      | 2466                                                                                | 0.84    | 5.02                                      |
| 2913                                                                                | 0.92    | 5.50                                      | 3185                                                                                | 1.03    | 6.17                                      | 2516                                                                                | 0.83    | 4.98                                      |
| 2963                                                                                | 0.92    | 5.51                                      | 3235                                                                                | 1.03    | 6.17                                      | 2566                                                                                | 0.81    | 4.83                                      |
| 3013                                                                                | 0.92    | 5.50                                      | 3285                                                                                | 1.03    | 6.17                                      | 2616                                                                                | 0.83    | 4.99                                      |
| 3063                                                                                | 0.92    | 5.50                                      | 3335                                                                                | 1.03    | 6.16                                      | 2666                                                                                | 0.85    | 5.08                                      |
| 3113                                                                                | 0.91    | 5.48                                      | 3385                                                                                | 1.03    | 6.17                                      | 2716                                                                                | 0.85    | 5.12                                      |
| 3163                                                                                | 0.91    | 5.46                                      | 3435                                                                                | 1.03    | 6.16                                      | 2766                                                                                | 0.84    | 5.05                                      |
| 3213                                                                                | 0.91    | 5.44                                      | 3485                                                                                | 1.03    | 6.16                                      | 2816                                                                                | 0.83    | 4.99                                      |
| 3263                                                                                | 0.91    | 5.46                                      | 3535                                                                                | 1.03    | 6.17                                      | 2866                                                                                | 0.82    | 4.94                                      |
| 3313                                                                                | 0.91    | 5.44                                      | 3585                                                                                | 1.03    | 6.16                                      | 2916                                                                                | 0.86    | 5.18                                      |
| 3363                                                                                | 0.90    | 5.41                                      | 3635                                                                                | 1.03    | 6.18                                      | 2966                                                                                | 0.89    | 5.32                                      |
| 3413                                                                                | 0.91    | 5.47                                      | 3685                                                                                | 1.03    | 6.19                                      | 3016                                                                                | 0.87    | 5.23                                      |
| 3463                                                                                | 0.91    | 5.47                                      | 3735                                                                                | 1.03    | 6.17                                      | 3066                                                                                | 0.86    | 5.13                                      |
| 3513                                                                                | 0.91    | 5.45                                      | 3791                                                                                | 1.03    | 6.18                                      | 3116                                                                                | 0.90    | 5.37                                      |
| 3563                                                                                | 0.90    | 5.42                                      | 3841                                                                                | 1.03    | 6.19                                      | 3166                                                                                | 0.89    | 5.36                                      |
| 3613                                                                                | 0.91    | 5.47                                      | 3896                                                                                | 1.03    | 6.19                                      | 3216                                                                                | 0.90    | 5.38                                      |
| 3663                                                                                | 0.92    | 5.49                                      | 3946                                                                                | 1.03    | 6.18                                      | 3266                                                                                | 0.86    | 5.18                                      |
| 3713                                                                                | 0.91    | 5.48                                      | 3996                                                                                | 1.03    | 6.18                                      | 3316                                                                                | 0.89    | 5.31                                      |
| 3763                                                                                | 0.91    | 5.48                                      | 4046                                                                                | 1.03    | 6.18                                      | 3366                                                                                | 0.87    | 5.22                                      |
| 3813                                                                                | 0.91    | 5.47                                      | 4096                                                                                | 1.03    | 6.18                                      | 3416                                                                                | 0.82    | 4.91                                      |
| 3863                                                                                | 0.91    | 5.45                                      | 4340                                                                                | 1.03    | 6.19                                      | 3466                                                                                | 0.86    | 5.14                                      |
| 3913                                                                                | 0.91    | 5.43                                      | 4390                                                                                | 1.03    | 6.19                                      | 3516                                                                                | 0.84    | 5.05                                      |
| 3963                                                                                | 0.90    | 5.41                                      | 4440                                                                                | 1.03    | 6.19                                      | 3566                                                                                | 0.86    | 5.17                                      |
| 4013                                                                                | 0.90    | 5.41                                      | 4490                                                                                | 1.03    | 6.19                                      | 3616                                                                                | 0.86    | 5.15                                      |
| 4063                                                                                | 0.91    | 5.43                                      | 4540                                                                                | 1.03    | 6.18                                      | 3666                                                                                | 0.82    | 4.89                                      |



**Table S5.** Continued.

| $p_{\text{CO}_2} = 3.49 \text{ kPa}$<br>$p_{\text{H}_2\text{O}} = 2.39 \text{ kPa}$ |         |                                           | $p_{\text{CO}_2} = 34.9 \text{ kPa}$<br>$p_{\text{H}_2\text{O}} = 2.21 \text{ kPa}$ |         |                                           | $p_{\text{CO}_2} = 3.49 \text{ kPa}$<br>$p_{\text{H}_2\text{O}} = 2.21 \text{ kPa}$ |         |                                           |
|-------------------------------------------------------------------------------------|---------|-------------------------------------------|-------------------------------------------------------------------------------------|---------|-------------------------------------------|-------------------------------------------------------------------------------------|---------|-------------------------------------------|
| Cycle                                                                               | $n/n_0$ | $n^{\text{ads}}$<br>/mmol g <sup>-1</sup> | Cycle                                                                               | $n/n_0$ | $n^{\text{ads}}$<br>/mmol g <sup>-1</sup> | Cycle                                                                               | $n/n_0$ | $n^{\text{ads}}$<br>/mmol g <sup>-1</sup> |
| 4113                                                                                | 0.90    | 5.42                                      | 4590                                                                                | 1.03    | 6.16                                      | 3716                                                                                | 0.90    | 5.37                                      |
| 4163                                                                                | 0.90    | 5.41                                      | 4640                                                                                | 1.03    | 6.17                                      | 3766                                                                                | 0.87    | 5.22                                      |
| 4213                                                                                | 0.91    | 5.46                                      | 4690                                                                                | 1.03    | 6.18                                      | 3816                                                                                | 0.83    | 4.99                                      |
| 4263                                                                                | 0.90    | 5.42                                      | 4740                                                                                | 1.03    | 6.18                                      | 3866                                                                                | 0.83    | 5.00                                      |
| 4317                                                                                | 0.90    | 5.40                                      | 4790                                                                                | 1.03    | 6.19                                      | 3916                                                                                | 0.84    | 5.01                                      |
| 4367                                                                                | 0.90    | 5.41                                      | 4840                                                                                | 1.03    | 6.18                                      | 3966                                                                                | 0.81    | 4.86                                      |
| 4417                                                                                | 0.90    | 5.39                                      | 4890                                                                                | 1.03    | 6.18                                      | 4016                                                                                | 0.82    | 4.94                                      |
| 4467                                                                                | 0.89    | 5.35                                      | 5002                                                                                | 1.03    | 6.18                                      | 4066                                                                                | 0.80    | 4.82                                      |
| 4517                                                                                | 0.89    | 5.34                                      | 5052                                                                                | 1.03    | 6.18                                      | 4116                                                                                | 0.82    | 4.90                                      |
| 4567                                                                                | 0.89    | 5.36                                      | 5097                                                                                | 1.03    | 6.19                                      | 4166                                                                                | 0.80    | 4.82                                      |
| 4617                                                                                | 0.89    | 5.35                                      |                                                                                     |         |                                           | 4216                                                                                | 0.77    | 4.62                                      |
| 4669                                                                                | 0.89    | 5.35                                      |                                                                                     |         |                                           | 4266                                                                                | 0.77    | 4.63                                      |
| 4719                                                                                | 0.90    | 5.39                                      |                                                                                     |         |                                           | 4316                                                                                | 0.74    | 4.45                                      |
| 4769                                                                                | 0.89    | 5.31                                      |                                                                                     |         |                                           | 4366                                                                                | 0.71    | 4.26                                      |
| 4819                                                                                | 0.90    | 5.37                                      |                                                                                     |         |                                           | 4416                                                                                | 0.75    | 4.49                                      |
| 4869                                                                                | 0.90    | 5.41                                      |                                                                                     |         |                                           | 4466                                                                                | 0.70    | 4.20                                      |
| 4919                                                                                | 0.90    | 5.41                                      |                                                                                     |         |                                           | 4516                                                                                | 0.76    | 4.53                                      |
| 4969                                                                                | 0.89    | 5.36                                      |                                                                                     |         |                                           | 4566                                                                                | 0.76    | 4.57                                      |
| 5019                                                                                | 0.89    | 5.33                                      |                                                                                     |         |                                           | 4616                                                                                | 0.75    | 4.49                                      |
| 5069                                                                                | 0.89    | 5.33                                      |                                                                                     |         |                                           | 4666                                                                                | 0.74    | 4.41                                      |
| 5119                                                                                | 0.89    | 5.32                                      |                                                                                     |         |                                           | 4716                                                                                | 0.74    | 4.41                                      |
| 5169                                                                                | 0.89    | 5.31                                      |                                                                                     |         |                                           | 4766                                                                                | 0.72    | 4.33                                      |
|                                                                                     |         |                                           |                                                                                     |         |                                           | 4816                                                                                | 0.78    | 4.67                                      |
|                                                                                     |         |                                           |                                                                                     |         |                                           | 4866                                                                                | 0.78    | 4.70                                      |
|                                                                                     |         |                                           |                                                                                     |         |                                           | 4916                                                                                | 0.75    | 4.51                                      |
|                                                                                     |         |                                           |                                                                                     |         |                                           | 4966                                                                                | 0.74    | 4.45                                      |
|                                                                                     |         |                                           |                                                                                     |         |                                           | 5016                                                                                | 0.74    | 4.44                                      |
|                                                                                     |         |                                           |                                                                                     |         |                                           | 5066                                                                                | 0.71    | 4.25                                      |
|                                                                                     |         |                                           |                                                                                     |         |                                           | 5116                                                                                | 0.71    | 4.26                                      |
|                                                                                     |         |                                           |                                                                                     |         |                                           | 5166                                                                                | 0.69    | 4.16                                      |
|                                                                                     |         |                                           |                                                                                     |         |                                           | 5236                                                                                | 0.66    | 3.96                                      |

**Table S6. 2.2 nm pore silica capacities for the wet gas regeneration experiments.**

| $p_{\text{CO}_2} = 3.49 \text{ kPa}$<br>$p_{\text{H}_2\text{O}} = 2.39 \text{ kPa}$ |         |                                           | $p_{\text{CO}_2} = 34.9 \text{ kPa}$<br>$p_{\text{H}_2\text{O}} = 2.21 \text{ kPa}$ |         |                                           | $p_{\text{CO}_2} = 3.49 \text{ kPa}$<br>$p_{\text{H}_2\text{O}} = 2.21 \text{ kPa}$ |         |                                           |
|-------------------------------------------------------------------------------------|---------|-------------------------------------------|-------------------------------------------------------------------------------------|---------|-------------------------------------------|-------------------------------------------------------------------------------------|---------|-------------------------------------------|
| Cycle                                                                               | $n/n_0$ | $n^{\text{ads}}$<br>/mmol g <sup>-1</sup> | Cycle                                                                               | $n/n_0$ | $n^{\text{ads}}$<br>/mmol g <sup>-1</sup> | Cycle                                                                               | $n/n_0$ | $n^{\text{ads}}$<br>/mmol g <sup>-1</sup> |
| 50                                                                                  | 1.00    | 5.99                                      | 50                                                                                  | 1.00    | 6.00                                      | 45                                                                                  | 1.00    | 5.99                                      |
| 100                                                                                 | 0.99    | 5.95                                      | 100                                                                                 | 1.00    | 5.99                                      | 95                                                                                  | 1.03    | 6.19                                      |
| 150                                                                                 | 0.99    | 5.94                                      | 150                                                                                 | 0.98    | 5.88                                      | 145                                                                                 | 0.97    | 5.82                                      |
| 200                                                                                 | 0.99    | 5.96                                      | 200                                                                                 | 0.98    | 5.89                                      | 195                                                                                 | 0.99    | 5.96                                      |
| 250                                                                                 | 0.99    | 5.92                                      | 270                                                                                 | 1.01    | 6.04                                      | 245                                                                                 | 0.91    | 5.48                                      |
| 300                                                                                 | 0.99    | 5.95                                      | 335                                                                                 | 1.00    | 5.98                                      | 295                                                                                 | 0.95    | 5.69                                      |
| 350                                                                                 | 0.99    | 5.96                                      | 385                                                                                 | 1.00    | 5.98                                      | 345                                                                                 | 0.91    | 5.47                                      |
| 400                                                                                 | 1.00    | 5.97                                      | 455                                                                                 | 1.02    | 6.11                                      | 395                                                                                 | 0.94    | 5.61                                      |
| 450                                                                                 | 0.99    | 5.94                                      | 505                                                                                 | 1.03    | 6.20                                      | 445                                                                                 | 0.93    | 5.56                                      |
| 500                                                                                 | 0.99    | 5.94                                      | 555                                                                                 | 1.03    | 6.16                                      | 495                                                                                 | 0.88    | 5.27                                      |
| 550                                                                                 | 0.99    | 5.92                                      | 605                                                                                 | 1.01    | 6.03                                      | 545                                                                                 | 0.89    | 5.32                                      |
| 600                                                                                 | 0.99    | 5.93                                      | 655                                                                                 | 1.00    | 5.98                                      | 595                                                                                 | 0.89    | 5.36                                      |
| 650                                                                                 | 0.99    | 5.93                                      | 705                                                                                 | 1.00    | 5.99                                      | 645                                                                                 | 0.89    | 5.32                                      |
| 700                                                                                 | 0.99    | 5.92                                      | 755                                                                                 | 1.01    | 6.06                                      | 695                                                                                 | 0.89    | 5.31                                      |
| 750                                                                                 | 0.99    | 5.91                                      | 805                                                                                 | 1.01    | 6.08                                      | 745                                                                                 | 0.85    | 5.07                                      |
| 800                                                                                 | 0.99    | 5.92                                      | 855                                                                                 | 1.02    | 6.09                                      | 795                                                                                 | 0.85    | 5.10                                      |
| 850                                                                                 | 0.98    | 5.90                                      | 905                                                                                 | 1.01    | 6.06                                      | 845                                                                                 | 0.86    | 5.15                                      |
| 900                                                                                 | 0.98    | 5.90                                      | 955                                                                                 | 1.00    | 6.00                                      | 895                                                                                 | 0.86    | 5.18                                      |
| 950                                                                                 | 0.98    | 5.85                                      | 1005                                                                                | 1.02    | 6.11                                      | 945                                                                                 | 0.84    | 5.01                                      |
| 1000                                                                                | 0.98    | 5.87                                      | 1055                                                                                | 1.00    | 5.99                                      | 995                                                                                 | 0.85    | 5.08                                      |
| 1050                                                                                | 0.98    | 5.85                                      | 1105                                                                                | 1.01    | 6.08                                      | 1045                                                                                | 0.81    | 4.86                                      |
| 1100                                                                                | 0.98    | 5.86                                      | 1155                                                                                | 1.01    | 6.06                                      | 1095                                                                                | 0.81    | 4.87                                      |
| 1150                                                                                | 0.97    | 5.83                                      | 1205                                                                                | 1.03    | 6.19                                      | 1145                                                                                | 0.82    | 4.93                                      |
| 1200                                                                                | 0.98    | 5.85                                      | 1255                                                                                | 1.04    | 6.22                                      | 1195                                                                                | 0.82    | 4.94                                      |
| 1250                                                                                | 0.97    | 5.80                                      | 1305                                                                                | 1.03    | 6.19                                      | 1245                                                                                | 0.80    | 4.80                                      |
| 1300                                                                                | 0.97    | 5.81                                      | 1355                                                                                | 1.03    | 6.20                                      | 1295                                                                                | 0.79    | 4.71                                      |
| 1350                                                                                | 0.96    | 5.78                                      | 1405                                                                                | 1.04    | 6.22                                      | 1345                                                                                | 0.80    | 4.81                                      |
| 1400                                                                                | 0.96    | 5.78                                      | 1455                                                                                | 1.04    | 6.21                                      | 1395                                                                                | 0.80    | 4.79                                      |
| 1450                                                                                | 0.96    | 5.76                                      | 1505                                                                                | 1.06    | 6.34                                      | 1445                                                                                | 0.83    | 4.95                                      |
| 1500                                                                                | 0.96    | 5.73                                      | 1555                                                                                | 1.06    | 6.38                                      | 1495                                                                                | 0.81    | 4.83                                      |
| 1580                                                                                | 0.96    | 5.73                                      | 1605                                                                                | 1.07    | 6.42                                      | 1545                                                                                | 0.83    | 4.97                                      |
| 1630                                                                                | 0.95    | 5.68                                      | 1655                                                                                | 1.08    | 6.48                                      | 1595                                                                                | 0.77    | 4.63                                      |
| 1680                                                                                | 0.95    | 5.67                                      | 1705                                                                                | 1.10    | 6.57                                      | 1645                                                                                | 0.76    | 4.56                                      |
| 1730                                                                                | 0.94    | 5.66                                      | 1755                                                                                | 1.09    | 6.52                                      | 1695                                                                                | 0.80    | 4.82                                      |
| 1780                                                                                | 0.94    | 5.64                                      | 1805                                                                                | 1.10    | 6.61                                      | 1745                                                                                | 0.81    | 4.86                                      |
| 1830                                                                                | 0.94    | 5.63                                      | 1855                                                                                | 1.09    | 6.56                                      | 1795                                                                                | 0.80    | 4.77                                      |
| 1880                                                                                | 0.94    | 5.62                                      | 1905                                                                                | 1.10    | 6.59                                      | 1845                                                                                | 0.77    | 4.64                                      |

**Table S6.** Continued.

| $p_{\text{CO}_2} = 3.49 \text{ kPa}$<br>$p_{\text{H}_2\text{O}} = 2.39 \text{ kPa}$ |         |                                           | $p_{\text{CO}_2} = 34.9 \text{ kPa}$<br>$p_{\text{H}_2\text{O}} = 2.21 \text{ kPa}$ |         |                                           | $p_{\text{CO}_2} = 3.49 \text{ kPa}$<br>$p_{\text{H}_2\text{O}} = 2.21 \text{ kPa}$ |         |                                           |
|-------------------------------------------------------------------------------------|---------|-------------------------------------------|-------------------------------------------------------------------------------------|---------|-------------------------------------------|-------------------------------------------------------------------------------------|---------|-------------------------------------------|
| Cycle                                                                               | $n/n_0$ | $n^{\text{ads}}$<br>/mmol g <sup>-1</sup> | Cycle                                                                               | $n/n_0$ | $n^{\text{ads}}$<br>/mmol g <sup>-1</sup> | Cycle                                                                               | $n/n_0$ | $n^{\text{ads}}$<br>/mmol g <sup>-1</sup> |
| 1930                                                                                | 0.94    | 5.62                                      | 1955                                                                                | 1.09    | 6.53                                      | 1895                                                                                | 0.78    | 4.69                                      |
| 2000                                                                                | 0.94    | 5.62                                      | 2005                                                                                | 1.10    | 6.59                                      | 1945                                                                                | 0.75    | 4.53                                      |
| 2050                                                                                | 0.94    | 5.61                                      | 2055                                                                                | 1.09    | 6.54                                      | 1995                                                                                | 0.76    | 4.58                                      |
| 2100                                                                                | 0.93    | 5.60                                      | 2110                                                                                | 1.08    | 6.48                                      | 2045                                                                                | 0.73    | 4.36                                      |
| 2150                                                                                | 0.93    | 5.60                                      | 2160                                                                                | 1.08    | 6.50                                      | 2095                                                                                | 0.78    | 4.65                                      |
| 2200                                                                                | 0.94    | 5.61                                      | 2226                                                                                | 1.10    | 6.60                                      | 2145                                                                                | 0.76    | 4.57                                      |
| 2250                                                                                | 0.93    | 5.60                                      | 2276                                                                                | 1.11    | 6.64                                      | 2195                                                                                | 0.74    | 4.46                                      |
| 2300                                                                                | 0.93    | 5.60                                      | 2327                                                                                | 1.11    | 6.66                                      | 2245                                                                                | 0.73    | 4.35                                      |
| 2350                                                                                | 0.93    | 5.60                                      | 2377                                                                                | 1.10    | 6.57                                      | 2295                                                                                | 0.73    | 4.39                                      |
| 2400                                                                                | 0.93    | 5.60                                      | 2427                                                                                | 1.10    | 6.62                                      | 2345                                                                                | 0.71    | 4.25                                      |
| 2455                                                                                | 0.93    | 5.60                                      | 2477                                                                                | 1.11    | 6.65                                      | 2395                                                                                | 0.76    | 4.58                                      |
| 2505                                                                                | 0.93    | 5.60                                      | 2527                                                                                | 1.09    | 6.51                                      | 2445                                                                                | 0.77    | 4.61                                      |
| 2555                                                                                | 0.93    | 5.60                                      | 2577                                                                                | 1.09    | 6.55                                      | 2495                                                                                | 0.80    | 4.80                                      |
| 2609                                                                                | 0.93    | 5.59                                      | 2622                                                                                | 1.10    | 6.59                                      | 2545                                                                                | 0.77    | 4.59                                      |
| 2659                                                                                | 0.93    | 5.57                                      | 2672                                                                                | 1.09    | 6.55                                      | 2595                                                                                | 0.72    | 4.34                                      |
| 2709                                                                                | 0.93    | 5.56                                      | 2722                                                                                | 1.11    | 6.62                                      | 2645                                                                                | 0.77    | 4.62                                      |
| 2759                                                                                | 0.93    | 5.57                                      | 2772                                                                                | 1.10    | 6.59                                      | 2695                                                                                | 0.74    | 4.41                                      |
| 2809                                                                                | 0.93    | 5.58                                      | 2822                                                                                | 1.11    | 6.62                                      | 2745                                                                                | 0.75    | 4.50                                      |
| 2859                                                                                | 0.93    | 5.57                                      | 2872                                                                                | 1.10    | 6.59                                      | 2795                                                                                | 0.68    | 4.05                                      |
| 2909                                                                                | 0.93    | 5.58                                      | 2922                                                                                | 1.10    | 6.60                                      | 2845                                                                                | 0.72    | 4.34                                      |
| 2959                                                                                | 0.93    | 5.58                                      | 2973                                                                                | 1.09    | 6.51                                      | 2895                                                                                | 0.70    | 4.21                                      |
| 3009                                                                                | 0.93    | 5.58                                      | 3023                                                                                | 1.10    | 6.59                                      | 2946                                                                                | 0.71    | 4.25                                      |
| 3059                                                                                | 0.93    | 5.57                                      | 3073                                                                                | 1.09    | 6.56                                      | 2996                                                                                | 0.72    | 4.34                                      |
| 3109                                                                                | 0.93    | 5.58                                      | 3123                                                                                | 1.10    | 6.61                                      | 3046                                                                                | 0.73    | 4.36                                      |
| 3159                                                                                | 0.93    | 5.57                                      | 3173                                                                                | 1.11    | 6.64                                      | 3096                                                                                | 0.74    | 4.46                                      |
| 3209                                                                                | 0.93    | 5.57                                      | 3223                                                                                | 1.10    | 6.59                                      | 3146                                                                                | 0.75    | 4.51                                      |
| 3259                                                                                | 0.93    | 5.57                                      | 3273                                                                                | 1.10    | 6.59                                      | 3196                                                                                | 0.76    | 4.53                                      |
| 3309                                                                                | 0.93    | 5.56                                      | 3323                                                                                | 1.10    | 6.59                                      | 3246                                                                                | 0.77    | 4.60                                      |
| 3359                                                                                | 0.93    | 5.56                                      | 3373                                                                                | 1.10    | 6.62                                      | 3296                                                                                | 0.73    | 4.40                                      |
| 3409                                                                                | 0.93    | 5.56                                      | 3423                                                                                | 1.10    | 6.62                                      | 3346                                                                                | 0.78    | 4.66                                      |
| 3459                                                                                | 0.93    | 5.57                                      | 3473                                                                                | 1.11    | 6.68                                      | 3396                                                                                | 0.71    | 4.28                                      |
| 3509                                                                                | 0.93    | 5.56                                      | 3523                                                                                | 1.11    | 6.66                                      | 3446                                                                                | 0.71    | 4.25                                      |
| 3559                                                                                | 0.93    | 5.58                                      | 3574                                                                                | 1.12    | 6.69                                      | 3496                                                                                | 0.69    | 4.15                                      |
| 3609                                                                                | 0.93    | 5.60                                      | 3624                                                                                | 1.10    | 6.60                                      | 3546                                                                                | 0.69    | 4.13                                      |
| 3654                                                                                | 0.93    | 5.58                                      | 3674                                                                                | 1.11    | 6.64                                      | 3596                                                                                | 0.68    | 4.05                                      |
| 3704                                                                                | 0.93    | 5.56                                      | 3724                                                                                | 1.12    | 6.70                                      | 3646                                                                                | 0.71    | 4.27                                      |

**Table S6.** Continued.

| $p_{\text{CO}_2} = 3.49 \text{ kPa}$<br>$p_{\text{H}_2\text{O}} = 2.39 \text{ kPa}$ |         |                                           | $p_{\text{CO}_2} = 34.9 \text{ kPa}$<br>$p_{\text{H}_2\text{O}} = 2.21 \text{ kPa}$ |         |                                           | $p_{\text{CO}_2} = 3.49 \text{ kPa}$<br>$p_{\text{H}_2\text{O}} = 2.21 \text{ kPa}$ |         |                                           |
|-------------------------------------------------------------------------------------|---------|-------------------------------------------|-------------------------------------------------------------------------------------|---------|-------------------------------------------|-------------------------------------------------------------------------------------|---------|-------------------------------------------|
| Cycle                                                                               | $n/n_0$ | $n^{\text{ads}}$<br>/mmol g <sup>-1</sup> | Cycle                                                                               | $n/n_0$ | $n^{\text{ads}}$<br>/mmol g <sup>-1</sup> | Cycle                                                                               | $n/n_0$ | $n^{\text{ads}}$<br>/mmol g <sup>-1</sup> |
| 3754                                                                                | 0.93    | 5.56                                      | 3774                                                                                | 1.13    | 6.78                                      | 3696                                                                                | 0.74    | 4.47                                      |
| 3804                                                                                | 0.93    | 5.56                                      | 3824                                                                                | 1.13    | 6.75                                      | 3746                                                                                | 0.71    | 4.27                                      |
| 3854                                                                                | 0.93    | 5.57                                      | 3874                                                                                | 1.13    | 6.76                                      | 3796                                                                                | 0.69    | 4.14                                      |
| 3904                                                                                | 0.93    | 5.57                                      | 3924                                                                                | 1.13    | 6.77                                      | 3846                                                                                | 0.71    | 4.28                                      |
| 3954                                                                                | 0.93    | 5.59                                      | 3974                                                                                | 1.12    | 6.74                                      | 3896                                                                                | 0.73    | 4.36                                      |
| 4004                                                                                | 0.93    | 5.57                                      | 4024                                                                                | 1.15    | 6.89                                      | 3946                                                                                | 0.71    | 4.25                                      |
| 4054                                                                                | 0.93    | 5.56                                      | 4077                                                                                | 1.15    | 6.90                                      | 3996                                                                                | 0.70    | 4.19                                      |
| 4104                                                                                | 0.93    | 5.55                                      | 4127                                                                                | 1.16    | 6.96                                      | 4046                                                                                | 0.70    | 4.20                                      |
| 4154                                                                                | 0.93    | 5.56                                      | 4179                                                                                | 1.14    | 6.83                                      | 4096                                                                                | 0.71    | 4.25                                      |
| 4204                                                                                | 0.93    | 5.56                                      | 4229                                                                                | 1.13    | 6.76                                      | 4146                                                                                | 0.68    | 4.08                                      |
| 4254                                                                                | 0.93    | 5.57                                      | 4279                                                                                | 1.16    | 6.93                                      | 4196                                                                                | 0.71    | 4.24                                      |
| 4299                                                                                | 0.93    | 5.57                                      | 4329                                                                                | 1.14    | 6.85                                      | 4246                                                                                | 0.73    | 4.37                                      |
| 4349                                                                                | 0.93    | 5.55                                      | 4379                                                                                | 1.14    | 6.83                                      | 4296                                                                                | 0.72    | 4.31                                      |
| 4399                                                                                | 0.93    | 5.56                                      | 4429                                                                                | 1.15    | 6.89                                      | 4346                                                                                | 0.69    | 4.17                                      |
| 4449                                                                                | 0.93    | 5.55                                      | 4479                                                                                | 1.16    | 6.96                                      | 4396                                                                                | 0.70    | 4.22                                      |
| 4499                                                                                | 0.93    | 5.56                                      | 4529                                                                                | 1.14    | 6.86                                      | 4446                                                                                | 0.68    | 4.10                                      |
| 4549                                                                                | 0.93    | 5.58                                      | 4579                                                                                | 1.17    | 7.04                                      | 4496                                                                                | 0.66    | 3.96                                      |
| 4599                                                                                | 0.93    | 5.59                                      | 4629                                                                                | 1.17    | 7.02                                      | 4546                                                                                | 0.70    | 4.19                                      |
| 4649                                                                                | 0.93    | 5.57                                      | 4684                                                                                | 1.16    | 6.98                                      | 4596                                                                                | 0.74    | 4.46                                      |
| 4699                                                                                | 0.93    | 5.57                                      | 4739                                                                                | 1.17    | 6.99                                      | 4646                                                                                | 0.67    | 4.04                                      |
| 4749                                                                                | 0.93    | 5.59                                      | 4789                                                                                | 1.16    | 6.97                                      | 4696                                                                                | 0.67    | 4.02                                      |
| 4799                                                                                | 0.93    | 5.59                                      | 4844                                                                                | 1.17    | 7.02                                      | 4746                                                                                | 0.70    | 4.21                                      |
| 4854                                                                                | 0.93    | 5.57                                      | 4894                                                                                | 1.16    | 6.96                                      | 4796                                                                                | 0.67    | 4.02                                      |
| 4899                                                                                | 0.93    | 5.59                                      | 4949                                                                                | 1.15    | 6.90                                      | 4846                                                                                | 0.70    | 4.18                                      |
| 4949                                                                                | 0.93    | 5.58                                      | 4999                                                                                | 1.15    | 6.90                                      | 4896                                                                                | 0.70    | 4.19                                      |
| 4999                                                                                | 0.93    | 5.59                                      | 5049                                                                                | 1.15    | 6.92                                      | 4946                                                                                | 0.67    | 4.01                                      |
| 5049                                                                                | 0.93    | 5.58                                      | 5069                                                                                | 1.15    | 6.91                                      | 4996                                                                                | 0.64    | 3.82                                      |
| 5099                                                                                | 0.93    | 5.60                                      |                                                                                     |         |                                           | 5046                                                                                | 0.60    | 3.57                                      |
| 5149                                                                                | 0.93    | 5.60                                      |                                                                                     |         |                                           | 5096                                                                                | 0.60    | 3.60                                      |
| 5199                                                                                | 0.93    | 5.58                                      |                                                                                     |         |                                           | 5146                                                                                | 0.67    | 4.04                                      |
| 5249                                                                                | 0.93    | 5.59                                      |                                                                                     |         |                                           | 5186                                                                                | 0.70    | 4.18                                      |
| 5299                                                                                | 0.93    | 5.57                                      |                                                                                     |         |                                           |                                                                                     |         |                                           |
| 5349                                                                                | 0.93    | 5.58                                      |                                                                                     |         |                                           |                                                                                     |         |                                           |
| 5379                                                                                | 0.93    | 5.59                                      |                                                                                     |         |                                           |                                                                                     |         |                                           |

**Table S7. 3.0 nm pore silica capacities for the dry gas regeneration experiments.**

| $p_{\text{CO}_2} = 3.49 \text{ kPa}$<br>$p_{\text{H}_2\text{O}} = 2.39 \text{ kPa}$ |         |                                           | $p_{\text{CO}_2} = 34.9 \text{ kPa}$<br>$p_{\text{H}_2\text{O}} = 2.21 \text{ kPa}$ |         |                                           | $p_{\text{CO}_2} = 3.49 \text{ kPa}$<br>$p_{\text{H}_2\text{O}} = 2.21 \text{ kPa}$ |         |                                           |
|-------------------------------------------------------------------------------------|---------|-------------------------------------------|-------------------------------------------------------------------------------------|---------|-------------------------------------------|-------------------------------------------------------------------------------------|---------|-------------------------------------------|
| Cycle                                                                               | $n/n_0$ | $n^{\text{ads}}$<br>/mmol g <sup>-1</sup> | Cycle                                                                               | $n/n_0$ | $n^{\text{ads}}$<br>/mmol g <sup>-1</sup> | Cycle                                                                               | $n/n_0$ | $n^{\text{ads}}$<br>/mmol g <sup>-1</sup> |
| 50                                                                                  | 1.00    | 2.73                                      | 50                                                                                  | 1.00    | 2.74                                      | 45                                                                                  | 0.99    | 2.71                                      |
| 100                                                                                 | 1.00    | 2.75                                      | 100                                                                                 | 0.99    | 2.72                                      | 95                                                                                  | 1.01    | 2.77                                      |
| 150                                                                                 | 1.00    | 2.75                                      | 221                                                                                 | 0.99    | 2.73                                      | 145                                                                                 | 1.00    | 2.73                                      |
| 200                                                                                 | 0.99    | 2.72                                      | 271                                                                                 | 0.99    | 2.72                                      | 195                                                                                 | 1.00    | 2.75                                      |
| 250                                                                                 | 1.00    | 2.73                                      | 321                                                                                 | 1.00    | 2.74                                      | 245                                                                                 | 0.99    | 2.72                                      |
| 300                                                                                 | 0.98    | 2.69                                      | 371                                                                                 | 1.00    | 2.74                                      | 316                                                                                 | 0.99    | 2.71                                      |
| 350                                                                                 | 0.99    | 2.70                                      | 421                                                                                 | 1.00    | 2.74                                      | 366                                                                                 | 0.95    | 2.60                                      |
| 400                                                                                 | 0.98    | 2.69                                      | 471                                                                                 | 1.01    | 2.76                                      | 416                                                                                 | 0.88    | 2.42                                      |
| 450                                                                                 | 0.97    | 2.67                                      | 615                                                                                 | 1.02    | 2.80                                      | 466                                                                                 | 0.91    | 2.49                                      |
| 500                                                                                 | 0.98    | 2.68                                      | 665                                                                                 | 1.02    | 2.80                                      | 516                                                                                 | 0.87    | 2.38                                      |
| 550                                                                                 | 0.97    | 2.65                                      | 974                                                                                 | 1.03    | 2.82                                      | 566                                                                                 | 0.88    | 2.42                                      |
| 600                                                                                 | 0.97    | 2.66                                      | 1024                                                                                | 1.03    | 2.82                                      | 616                                                                                 | 0.86    | 2.35                                      |
| 650                                                                                 | 0.97    | 2.65                                      | 1074                                                                                | 1.03    | 2.83                                      | 666                                                                                 | 0.86    | 2.36                                      |
| 700                                                                                 | 0.97    | 2.65                                      | 1124                                                                                | 1.03    | 2.82                                      | 716                                                                                 | 0.86    | 2.35                                      |
| 750                                                                                 | 0.96    | 2.64                                      | 1174                                                                                | 1.03    | 2.82                                      | 766                                                                                 | 0.85    | 2.34                                      |
| 809                                                                                 | 0.97    | 2.66                                      | 1404                                                                                | 1.03    | 2.83                                      | 816                                                                                 | 0.88    | 2.42                                      |
| 859                                                                                 | 0.96    | 2.64                                      | 1454                                                                                | 1.03    | 2.82                                      | 866                                                                                 | 0.86    | 2.37                                      |
| 909                                                                                 | 0.96    | 2.63                                      | 1504                                                                                | 1.03    | 2.82                                      | 916                                                                                 | 0.89    | 2.43                                      |
| 959                                                                                 | 0.96    | 2.63                                      | 1554                                                                                | 1.03    | 2.83                                      | 966                                                                                 | 0.87    | 2.40                                      |
| 1009                                                                                | 0.95    | 2.61                                      | 1604                                                                                | 1.03    | 2.83                                      | 1016                                                                                | 0.88    | 2.41                                      |
| 1059                                                                                | 0.96    | 2.63                                      | 1654                                                                                | 1.03    | 2.83                                      | 1066                                                                                | 0.88    | 2.41                                      |
| 1109                                                                                | 0.96    | 2.64                                      | 1704                                                                                | 1.03    | 2.83                                      | 1116                                                                                | 0.89    | 2.45                                      |
| 1159                                                                                | 0.96    | 2.64                                      | 1754                                                                                | 1.03    | 2.83                                      | 1166                                                                                | 0.89    | 2.43                                      |
| 1209                                                                                | 0.95    | 2.62                                      | 1804                                                                                | 1.03    | 2.83                                      | 1216                                                                                | 0.88    | 2.42                                      |
| 1259                                                                                | 0.95    | 2.61                                      | 1854                                                                                | 1.03    | 2.82                                      | 1266                                                                                | 0.87    | 2.39                                      |
| 1309                                                                                | 0.95    | 2.59                                      | 1904                                                                                | 1.03    | 2.82                                      | 1316                                                                                | 0.89    | 2.44                                      |
| 1359                                                                                | 0.95    | 2.61                                      | 1954                                                                                | 1.03    | 2.82                                      | 1366                                                                                | 0.88    | 2.41                                      |
| 1409                                                                                | 0.96    | 2.62                                      | 2074                                                                                | 1.03    | 2.83                                      | 1416                                                                                | 0.90    | 2.46                                      |
| 1459                                                                                | 0.95    | 2.60                                      | 2124                                                                                | 1.03    | 2.84                                      | 1466                                                                                | 0.91    | 2.50                                      |
| 1509                                                                                | 0.94    | 2.57                                      | 2175                                                                                | 1.04    | 2.85                                      | 1516                                                                                | 0.88    | 2.43                                      |
| 1559                                                                                | 0.94    | 2.58                                      | 2225                                                                                | 1.05    | 2.87                                      | 1566                                                                                | 0.88    | 2.42                                      |
| 1609                                                                                | 0.94    | 2.58                                      | 2275                                                                                | 1.05    | 2.87                                      | 1616                                                                                | 0.85    | 2.33                                      |
| 1659                                                                                | 0.93    | 2.55                                      | 2325                                                                                | 1.05    | 2.88                                      | 1666                                                                                | 0.85    | 2.34                                      |
| 1709                                                                                | 0.92    | 2.53                                      | 2375                                                                                | 1.05    | 2.89                                      | 1716                                                                                | 0.85    | 2.32                                      |
| 1759                                                                                | 0.93    | 2.54                                      | 2425                                                                                | 1.05    | 2.88                                      | 1766                                                                                | 0.85    | 2.33                                      |
| 1809                                                                                | 0.93    | 2.54                                      | 2475                                                                                | 1.05    | 2.87                                      | 1816                                                                                | 0.88    | 2.40                                      |

**Table S7.** Continued.

| $p_{\text{CO}_2} = 3.49 \text{ kPa}$<br>$p_{\text{H}_2\text{O}} = 2.39 \text{ kPa}$ |         |                                           | $p_{\text{CO}_2} = 34.9 \text{ kPa}$<br>$p_{\text{H}_2\text{O}} = 2.21 \text{ kPa}$ |         |                                           | $p_{\text{CO}_2} = 3.49 \text{ kPa}$<br>$p_{\text{H}_2\text{O}} = 2.21 \text{ kPa}$ |         |                                           |
|-------------------------------------------------------------------------------------|---------|-------------------------------------------|-------------------------------------------------------------------------------------|---------|-------------------------------------------|-------------------------------------------------------------------------------------|---------|-------------------------------------------|
| Cycle                                                                               | $n/n_0$ | $n^{\text{ads}}$<br>/mmol g <sup>-1</sup> | Cycle                                                                               | $n/n_0$ | $n^{\text{ads}}$<br>/mmol g <sup>-1</sup> | Cycle                                                                               | $n/n_0$ | $n^{\text{ads}}$<br>/mmol g <sup>-1</sup> |
| 1859                                                                                | 0.93    | 2.54                                      | 2525                                                                                | 1.05    | 2.88                                      | 1866                                                                                | 0.88    | 2.42                                      |
| 1909                                                                                | 0.92    | 2.52                                      | 2575                                                                                | 1.06    | 2.89                                      | 1916                                                                                | 0.87    | 2.39                                      |
| 1959                                                                                | 0.93    | 2.56                                      | 2625                                                                                | 1.06    | 2.90                                      | 1966                                                                                | 0.86    | 2.35                                      |
| 2413                                                                                | 0.91    | 2.50                                      | 2675                                                                                | 1.06    | 2.90                                      | 2016                                                                                | 0.86    | 2.36                                      |
| 2463                                                                                | 0.89    | 2.45                                      | 2725                                                                                | 1.06    | 2.91                                      | 2066                                                                                | 0.85    | 2.34                                      |
| 2513                                                                                | 0.89    | 2.45                                      | 2775                                                                                | 1.06    | 2.91                                      | 2116                                                                                | 0.87    | 2.38                                      |
| 2563                                                                                | 0.89    | 2.43                                      | 2826                                                                                | 1.06    | 2.90                                      | 2166                                                                                | 0.86    | 2.36                                      |
| 2613                                                                                | 0.89    | 2.43                                      | 2876                                                                                | 1.06    | 2.90                                      | 2216                                                                                | 0.86    | 2.35                                      |
| 2663                                                                                | 0.89    | 2.44                                      | 2926                                                                                | 1.06    | 2.90                                      | 2266                                                                                | 0.87    | 2.39                                      |
| 2713                                                                                | 0.89    | 2.43                                      | 2976                                                                                | 1.06    | 2.91                                      | 2316                                                                                | 0.86    | 2.36                                      |
| 2763                                                                                | 0.88    | 2.42                                      | 3026                                                                                | 1.06    | 2.91                                      | 2366                                                                                | 0.87    | 2.38                                      |
| 2813                                                                                | 0.88    | 2.41                                      | 3076                                                                                | 1.06    | 2.91                                      | 2416                                                                                | 0.87    | 2.37                                      |
| 2863                                                                                | 0.88    | 2.41                                      | 3135                                                                                | 1.06    | 2.90                                      | 2466                                                                                | 0.88    | 2.40                                      |
| 2913                                                                                | 0.88    | 2.40                                      | 3185                                                                                | 1.06    | 2.91                                      | 2516                                                                                | 0.86    | 2.35                                      |
| 2963                                                                                | 0.88    | 2.40                                      | 3235                                                                                | 1.07    | 2.92                                      | 2566                                                                                | 0.87    | 2.38                                      |
| 3013                                                                                | 0.88    | 2.40                                      | 3285                                                                                | 1.07    | 2.93                                      | 2616                                                                                | 0.86    | 2.37                                      |
| 3063                                                                                | 0.88    | 2.41                                      | 3335                                                                                | 1.07    | 2.94                                      | 2666                                                                                | 0.87    | 2.38                                      |
| 3113                                                                                | 0.88    | 2.40                                      | 3385                                                                                | 1.08    | 2.95                                      | 2716                                                                                | 0.88    | 2.41                                      |
| 3163                                                                                | 0.87    | 2.39                                      | 3435                                                                                | 1.07    | 2.94                                      | 2766                                                                                | 0.86    | 2.36                                      |
| 3213                                                                                | 0.87    | 2.39                                      | 3485                                                                                | 1.07    | 2.92                                      | 2816                                                                                | 0.86    | 2.36                                      |
| 3263                                                                                | 0.87    | 2.39                                      | 3535                                                                                | 1.07    | 2.93                                      | 2866                                                                                | 0.85    | 2.33                                      |
| 3313                                                                                | 0.87    | 2.38                                      | 3585                                                                                | 1.08    | 2.95                                      | 2916                                                                                | 0.85    | 2.34                                      |
| 3363                                                                                | 0.86    | 2.37                                      | 3635                                                                                | 1.07    | 2.94                                      | 2966                                                                                | 0.87    | 2.39                                      |
| 3413                                                                                | 0.88    | 2.40                                      | 3685                                                                                | 1.08    | 2.96                                      | 3016                                                                                | 0.87    | 2.40                                      |
| 3463                                                                                | 0.87    | 2.40                                      | 3735                                                                                | 1.07    | 2.94                                      | 3066                                                                                | 0.86    | 2.35                                      |
| 3513                                                                                | 0.87    | 2.38                                      | 3791                                                                                | 1.08    | 2.95                                      | 3116                                                                                | 0.87    | 2.39                                      |
| 3563                                                                                | 0.87    | 2.38                                      | 3841                                                                                | 1.08    | 2.95                                      | 3166                                                                                | 0.87    | 2.38                                      |
| 3613                                                                                | 0.87    | 2.39                                      | 3896                                                                                | 1.08    | 2.96                                      | 3216                                                                                | 0.89    | 2.45                                      |
| 3663                                                                                | 0.87    | 2.39                                      | 3946                                                                                | 1.07    | 2.95                                      | 3266                                                                                | 0.87    | 2.37                                      |
| 3713                                                                                | 0.87    | 2.39                                      | 3996                                                                                | 1.08    | 2.96                                      | 3316                                                                                | 0.89    | 2.45                                      |
| 3763                                                                                | 0.87    | 2.39                                      | 4046                                                                                | 1.08    | 2.97                                      | 3366                                                                                | 0.87    | 2.38                                      |
| 3813                                                                                | 0.87    | 2.38                                      | 4096                                                                                | 1.08    | 2.95                                      | 3416                                                                                | 0.86    | 2.36                                      |
| 3863                                                                                | 0.87    | 2.37                                      | 4340                                                                                | 1.08    | 2.96                                      | 3466                                                                                | 0.86    | 2.37                                      |
| 3913                                                                                | 0.86    | 2.36                                      | 4390                                                                                | 1.08    | 2.96                                      | 3516                                                                                | 0.87    | 2.39                                      |
| 3963                                                                                | 0.86    | 2.36                                      | 4440                                                                                | 1.08    | 2.97                                      | 3566                                                                                | 0.88    | 2.41                                      |
| 4013                                                                                | 0.86    | 2.36                                      | 4490                                                                                | 1.10    | 3.01                                      | 3616                                                                                | 0.89    | 2.43                                      |

**Table S7.** Continued.

| $p_{\text{CO}_2} = 3.49 \text{ kPa}$<br>$p_{\text{H}_2\text{O}} = 2.39 \text{ kPa}$ |         |                                           | $p_{\text{CO}_2} = 34.9 \text{ kPa}$<br>$p_{\text{H}_2\text{O}} = 2.21 \text{ kPa}$ |         |                                           | $p_{\text{CO}_2} = 3.49 \text{ kPa}$<br>$p_{\text{H}_2\text{O}} = 2.21 \text{ kPa}$ |         |                                           |
|-------------------------------------------------------------------------------------|---------|-------------------------------------------|-------------------------------------------------------------------------------------|---------|-------------------------------------------|-------------------------------------------------------------------------------------|---------|-------------------------------------------|
| Cycle                                                                               | $n/n_0$ | $n^{\text{ads}}$<br>/mmol g <sup>-1</sup> | Cycle                                                                               | $n/n_0$ | $n^{\text{ads}}$<br>/mmol g <sup>-1</sup> | Cycle                                                                               | $n/n_0$ | $n^{\text{ads}}$<br>/mmol g <sup>-1</sup> |
| 4063                                                                                | 0.86    | 2.36                                      | 4540                                                                                | 1.10    | 3.01                                      | 3666                                                                                | 0.85    | 2.32                                      |
| 4113                                                                                | 0.86    | 2.36                                      | 4590                                                                                | 1.10    | 3.01                                      | 3716                                                                                | 0.87    | 2.38                                      |
| 4163                                                                                | 0.86    | 2.36                                      | 4640                                                                                | 1.10    | 3.01                                      | 3766                                                                                | 0.86    | 2.36                                      |
| 4213                                                                                | 0.87    | 2.37                                      | 4690                                                                                | 1.10    | 3.01                                      | 3816                                                                                | 0.86    | 2.35                                      |
| 4263                                                                                | 0.86    | 2.35                                      | 4740                                                                                | 1.09    | 2.99                                      | 3866                                                                                | 0.86    | 2.36                                      |
| 4317                                                                                | 0.86    | 2.35                                      | 4790                                                                                | 1.09    | 2.98                                      | 3916                                                                                | 0.85    | 2.33                                      |
| 4367                                                                                | 0.86    | 2.35                                      | 4840                                                                                | 1.09    | 2.98                                      | 3966                                                                                | 0.87    | 2.38                                      |
| 4417                                                                                | 0.87    | 2.37                                      | 4890                                                                                | 1.09    | 2.99                                      | 4016                                                                                | 0.86    | 2.37                                      |
| 4467                                                                                | 0.86    | 2.36                                      | 5002                                                                                | 1.08    | 2.97                                      | 4066                                                                                | 0.86    | 2.35                                      |
| 4517                                                                                | 0.86    | 2.36                                      | 5052                                                                                | 1.09    | 2.99                                      | 4116                                                                                | 0.87    | 2.37                                      |
| 4567                                                                                | 0.86    | 2.36                                      | 5097                                                                                | 1.09    | 2.98                                      | 4166                                                                                | 0.86    | 2.35                                      |
| 4617                                                                                | 0.86    | 2.37                                      |                                                                                     |         |                                           | 4216                                                                                | 0.85    | 2.33                                      |
| 4669                                                                                | 0.87    | 2.37                                      |                                                                                     |         |                                           | 4266                                                                                | 0.86    | 2.35                                      |
| 4719                                                                                | 0.87    | 2.39                                      |                                                                                     |         |                                           | 4316                                                                                | 0.85    | 2.34                                      |
| 4769                                                                                | 0.86    | 2.37                                      |                                                                                     |         |                                           | 4366                                                                                | 0.85    | 2.34                                      |
| 4819                                                                                | 0.87    | 2.39                                      |                                                                                     |         |                                           | 4416                                                                                | 0.84    | 2.30                                      |
| 4869                                                                                | 0.88    | 2.40                                      |                                                                                     |         |                                           | 4466                                                                                | 0.87    | 2.38                                      |
| 4919                                                                                | 0.88    | 2.40                                      |                                                                                     |         |                                           | 4516                                                                                | 0.86    | 2.37                                      |
| 4969                                                                                | 0.87    | 2.38                                      |                                                                                     |         |                                           | 4566                                                                                | 0.86    | 2.35                                      |
| 5019                                                                                | 0.86    | 2.37                                      |                                                                                     |         |                                           | 4616                                                                                | 0.86    | 2.35                                      |
| 5069                                                                                | 0.87    | 2.38                                      |                                                                                     |         |                                           | 4666                                                                                | 0.88    | 2.41                                      |
| 5119                                                                                | 0.87    | 2.39                                      |                                                                                     |         |                                           | 4716                                                                                | 0.87    | 2.39                                      |
| 5169                                                                                | 0.87    | 2.39                                      |                                                                                     |         |                                           | 4766                                                                                | 0.86    | 2.36                                      |
|                                                                                     |         |                                           |                                                                                     |         |                                           | 4816                                                                                | 0.85    | 2.34                                      |
|                                                                                     |         |                                           |                                                                                     |         |                                           | 4866                                                                                | 0.86    | 2.37                                      |
|                                                                                     |         |                                           |                                                                                     |         |                                           | 4916                                                                                | 0.86    | 2.35                                      |
|                                                                                     |         |                                           |                                                                                     |         |                                           | 4966                                                                                | 0.86    | 2.36                                      |
|                                                                                     |         |                                           |                                                                                     |         |                                           | 5016                                                                                | 0.85    | 2.34                                      |
|                                                                                     |         |                                           |                                                                                     |         |                                           | 5066                                                                                | 0.85    | 2.33                                      |
|                                                                                     |         |                                           |                                                                                     |         |                                           | 5116                                                                                | 0.86    | 2.36                                      |
|                                                                                     |         |                                           |                                                                                     |         |                                           | 5166                                                                                | 0.88    | 2.41                                      |
|                                                                                     |         |                                           |                                                                                     |         |                                           | 5236                                                                                | 0.88    | 2.40                                      |

**Table S8. 3.0 nm pore silica capacities for the wet gas regeneration experiments.**

| $p_{\text{CO}_2} = 3.49 \text{ kPa}$<br>$p_{\text{H}_2\text{O}} = 2.39 \text{ kPa}$ |         |                                           | $p_{\text{CO}_2} = 34.9 \text{ kPa}$<br>$p_{\text{H}_2\text{O}} = 2.21 \text{ kPa}$ |         |                                           | $p_{\text{CO}_2} = 3.49 \text{ kPa}$<br>$p_{\text{H}_2\text{O}} = 2.21 \text{ kPa}$ |         |                                           |
|-------------------------------------------------------------------------------------|---------|-------------------------------------------|-------------------------------------------------------------------------------------|---------|-------------------------------------------|-------------------------------------------------------------------------------------|---------|-------------------------------------------|
| Cycle                                                                               | $n/n_0$ | $n^{\text{ads}}$<br>/mmol g <sup>-1</sup> | Cycle                                                                               | $n/n_0$ | $n^{\text{ads}}$<br>/mmol g <sup>-1</sup> | Cycle                                                                               | $n/n_0$ | $n^{\text{ads}}$<br>/mmol g <sup>-1</sup> |
| 50                                                                                  | 1.00    | 2.74                                      | 50                                                                                  | 1.01    | 2.76                                      | 45                                                                                  | 1.00    | 2.74                                      |
| 100                                                                                 | 1.00    | 2.74                                      | 100                                                                                 | 1.01    | 2.76                                      | 95                                                                                  | 1.00    | 2.75                                      |
| 150                                                                                 | 0.99    | 2.73                                      | 150                                                                                 | 0.98    | 2.69                                      | 145                                                                                 | 0.98    | 2.69                                      |
| 200                                                                                 | 1.00    | 2.75                                      | 200                                                                                 | 0.96    | 2.63                                      | 195                                                                                 | 0.97    | 2.67                                      |
| 250                                                                                 | 0.99    | 2.71                                      | 250                                                                                 | 1.04    | 2.86                                      | 245                                                                                 | 0.96    | 2.63                                      |
| 300                                                                                 | 0.99    | 2.72                                      | 300                                                                                 | 1.08    | 2.97                                      | 295                                                                                 | 1.01    | 2.76                                      |
| 350                                                                                 | 0.99    | 2.70                                      | 350                                                                                 | 1.05    | 2.88                                      | 345                                                                                 | 1.02    | 2.80                                      |
| 400                                                                                 | 0.99    | 2.71                                      | 400                                                                                 | 1.04    | 2.85                                      | 395                                                                                 | 1.01    | 2.75                                      |
| 450                                                                                 | 0.99    | 2.70                                      | 450                                                                                 | 0.96    | 2.62                                      | 445                                                                                 | 0.97    | 2.67                                      |
| 500                                                                                 | 0.98    | 2.70                                      | 500                                                                                 | 0.99    | 2.71                                      | 495                                                                                 | 0.97    | 2.65                                      |
| 550                                                                                 | 0.98    | 2.70                                      | 550                                                                                 | 1.04    | 2.85                                      | 545                                                                                 | 0.95    | 2.60                                      |
| 600                                                                                 | 0.99    | 2.70                                      | 600                                                                                 | 1.00    | 2.73                                      | 595                                                                                 | 0.95    | 2.60                                      |
| 650                                                                                 | 0.98    | 2.69                                      | 650                                                                                 | 1.02    | 2.79                                      | 645                                                                                 | 0.98    | 2.69                                      |
| 700                                                                                 | 0.98    | 2.69                                      | 700                                                                                 | 0.99    | 2.71                                      | 695                                                                                 | 0.96    | 2.63                                      |
| 750                                                                                 | 0.98    | 2.68                                      | 750                                                                                 | 0.97    | 2.66                                      | 745                                                                                 | 0.92    | 2.51                                      |
| 800                                                                                 | 0.98    | 2.69                                      | 800                                                                                 | 1.02    | 2.79                                      | 795                                                                                 | 0.95    | 2.59                                      |
| 850                                                                                 | 0.98    | 2.69                                      | 850                                                                                 | 1.06    | 2.89                                      | 845                                                                                 | 0.95    | 2.60                                      |
| 900                                                                                 | 0.98    | 2.70                                      | 900                                                                                 | 1.06    | 2.90                                      | 895                                                                                 | 0.95    | 2.60                                      |
| 950                                                                                 | 0.98    | 2.70                                      | 950                                                                                 | 1.04    | 2.86                                      | 945                                                                                 | 0.93    | 2.56                                      |
| 1000                                                                                | 0.98    | 2.68                                      | 1000                                                                                | 1.01    | 2.76                                      | 995                                                                                 | 0.94    | 2.58                                      |
| 1050                                                                                | 0.97    | 2.67                                      | 1050                                                                                | 1.01    | 2.76                                      | 1045                                                                                | 0.90    | 2.47                                      |
| 1100                                                                                | 0.98    | 2.67                                      | 1100                                                                                | 1.01    | 2.77                                      | 1095                                                                                | 0.95    | 2.59                                      |
| 1150                                                                                | 0.97    | 2.67                                      | 1150                                                                                | 0.99    | 2.73                                      | 1145                                                                                | 0.97    | 2.66                                      |
| 1200                                                                                | 0.97    | 2.65                                      | 1200                                                                                | 1.05    | 2.87                                      | 1195                                                                                | 0.97    | 2.67                                      |
| 1250                                                                                | 0.97    | 2.65                                      | 1250                                                                                | 1.07    | 2.93                                      | 1245                                                                                | 0.92    | 2.53                                      |
| 1300                                                                                | 0.97    | 2.65                                      | 1300                                                                                | 1.03    | 2.82                                      | 1295                                                                                | 0.90    | 2.46                                      |
| 1350                                                                                | 0.96    | 2.64                                      | 1350                                                                                | 1.06    | 2.91                                      | 1345                                                                                | 0.95    | 2.59                                      |
| 1400                                                                                | 0.97    | 2.65                                      | 1400                                                                                | 1.05    | 2.87                                      | 1395                                                                                | 0.97    | 2.65                                      |
| 1450                                                                                | 0.97    | 2.67                                      | 1450                                                                                | 1.02    | 2.80                                      | 1445                                                                                | 0.97    | 2.66                                      |
| 1500                                                                                | 0.97    | 2.65                                      | 1500                                                                                | 1.08    | 2.97                                      | 1495                                                                                | 0.94    | 2.58                                      |
| 1580                                                                                | 0.97    | 2.65                                      | 1550                                                                                | 1.09    | 2.99                                      | 1545                                                                                | 0.90    | 2.48                                      |
| 1630                                                                                | 0.96    | 2.64                                      | 1600                                                                                | 1.11    | 3.04                                      | 1595                                                                                | 0.89    | 2.44                                      |
| 1680                                                                                | 0.96    | 2.63                                      | 1650                                                                                | 1.19    | 3.25                                      | 1645                                                                                | 0.88    | 2.40                                      |
| 1730                                                                                | 0.95    | 2.62                                      | 1700                                                                                | 1.11    | 3.05                                      | 1695                                                                                | 0.92    | 2.52                                      |
| 1780                                                                                | 0.96    | 2.62                                      | 1750                                                                                | 1.11    | 3.03                                      | 1745                                                                                | 0.92    | 2.51                                      |
| 1830                                                                                | 0.95    | 2.60                                      | 1800                                                                                | 1.16    | 3.17                                      | 1795                                                                                | 0.92    | 2.52                                      |
| 1880                                                                                | 0.95    | 2.59                                      | 1850                                                                                | 1.16    | 3.17                                      | 1845                                                                                | 0.95    | 2.59                                      |
| 1930                                                                                | 0.95    | 2.60                                      | 1900                                                                                | 1.15    | 3.16                                      | 1895                                                                                | 0.89    | 2.45                                      |



**Table S8.** Continued.

| $p_{\text{CO}_2} = 3.49 \text{ kPa}$<br>$p_{\text{H}_2\text{O}} = 2.39 \text{ kPa}$ |         |                                           | $p_{\text{CO}_2} = 34.9 \text{ kPa}$<br>$p_{\text{H}_2\text{O}} = 2.21 \text{ kPa}$ |         |                                           | $p_{\text{CO}_2} = 3.49 \text{ kPa}$<br>$p_{\text{H}_2\text{O}} = 2.21 \text{ kPa}$ |         |                                           |
|-------------------------------------------------------------------------------------|---------|-------------------------------------------|-------------------------------------------------------------------------------------|---------|-------------------------------------------|-------------------------------------------------------------------------------------|---------|-------------------------------------------|
| Cycle                                                                               | $n/n_0$ | $n^{\text{ads}}$<br>/mmol g <sup>-1</sup> | Cycle                                                                               | $n/n_0$ | $n^{\text{ads}}$<br>/mmol g <sup>-1</sup> | Cycle                                                                               | $n/n_0$ | $n^{\text{ads}}$<br>/mmol g <sup>-1</sup> |
| 2000                                                                                | 0.94    | 2.56                                      | 1950                                                                                | 1.15    | 3.14                                      | 1945                                                                                | 0.85    | 2.34                                      |
| 2050                                                                                | 0.93    | 2.56                                      | 2000                                                                                | 1.15    | 3.14                                      | 1995                                                                                | 0.88    | 2.41                                      |
| 2100                                                                                | 0.93    | 2.55                                      | 2050                                                                                | 1.23    | 3.37                                      | 2045                                                                                | 0.84    | 2.30                                      |
| 2150                                                                                | 0.94    | 2.57                                      | 2100                                                                                | 1.22    | 3.34                                      | 2095                                                                                | 0.83    | 2.27                                      |
| 2200                                                                                | 0.93    | 2.55                                      | 2150                                                                                | 1.28    | 3.51                                      | 2145                                                                                | 0.85    | 2.34                                      |
| 2250                                                                                | 0.94    | 2.57                                      | 2201                                                                                | 1.22    | 3.35                                      | 2195                                                                                | 0.89    | 2.44                                      |
| 2300                                                                                | 0.94    | 2.56                                      | 2251                                                                                | 1.19    | 3.27                                      | 2245                                                                                | 0.83    | 2.28                                      |
| 2350                                                                                | 0.94    | 2.57                                      | 2302                                                                                | 1.23    | 3.37                                      | 2295                                                                                | 0.83    | 2.26                                      |
| 2400                                                                                | 0.93    | 2.56                                      | 2352                                                                                | 1.26    | 3.45                                      | 2345                                                                                | 0.83    | 2.28                                      |
| 2455                                                                                | 0.93    | 2.55                                      | 2402                                                                                | 1.27    | 3.47                                      | 2395                                                                                | 0.88    | 2.40                                      |
| 2505                                                                                | 0.93    | 2.55                                      | 2452                                                                                | 1.21    | 3.32                                      | 2445                                                                                | 0.84    | 2.30                                      |
| 2555                                                                                | 0.93    | 2.56                                      | 2502                                                                                | 1.30    | 3.57                                      | 2495                                                                                | 0.90    | 2.46                                      |
| 2609                                                                                | 0.93    | 2.56                                      | 2552                                                                                | 1.26    | 3.44                                      | 2545                                                                                | 0.87    | 2.39                                      |
| 2659                                                                                | 0.93    | 2.55                                      | 2602                                                                                | 1.29    | 3.54                                      | 2595                                                                                | 0.85    | 2.34                                      |
| 2709                                                                                | 0.93    | 2.54                                      | 2652                                                                                | 1.29    | 3.53                                      | 2645                                                                                | 0.84    | 2.31                                      |
| 2759                                                                                | 0.93    | 2.54                                      | 2702                                                                                | 1.30    | 3.57                                      | 2695                                                                                | 0.82    | 2.25                                      |
| 2809                                                                                | 0.93    | 2.54                                      | 2752                                                                                | 1.31    | 3.58                                      | 2745                                                                                | 0.88    | 2.42                                      |
| 2859                                                                                | 0.93    | 2.55                                      | 2802                                                                                | 1.29    | 3.55                                      | 2795                                                                                | 0.81    | 2.23                                      |
| 2909                                                                                | 0.93    | 2.54                                      | 2852                                                                                | 1.22    | 3.34                                      | 2845                                                                                | 0.81    | 2.22                                      |
| 2959                                                                                | 0.93    | 2.54                                      | 2902                                                                                | 1.24    | 3.41                                      | 2895                                                                                | 0.80    | 2.19                                      |
| 3009                                                                                | 0.93    | 2.54                                      | 2952                                                                                | 1.27    | 3.47                                      | 2946                                                                                | 0.78    | 2.13                                      |
| 3059                                                                                | 0.93    | 2.54                                      | 3003                                                                                | 1.24    | 3.39                                      | 2996                                                                                | 0.80    | 2.18                                      |
| 3109                                                                                | 0.93    | 2.55                                      | 3053                                                                                | 1.21    | 3.32                                      | 3046                                                                                | 0.80    | 2.19                                      |
| 3159                                                                                | 0.92    | 2.53                                      | 3103                                                                                | 1.28    | 3.50                                      | 3096                                                                                | 0.84    | 2.30                                      |
| 3209                                                                                | 0.93    | 2.54                                      | 3153                                                                                | 1.30    | 3.56                                      | 3146                                                                                | 0.82    | 2.25                                      |
| 3259                                                                                | 0.92    | 2.53                                      | 3203                                                                                | 1.30    | 3.55                                      | 3196                                                                                | 0.77    | 2.10                                      |
| 3309                                                                                | 0.92    | 2.53                                      | 3253                                                                                | 1.27    | 3.49                                      | 3246                                                                                | 0.76    | 2.07                                      |
| 3359                                                                                | 0.93    | 2.54                                      | 3303                                                                                | 1.33    | 3.63                                      | 3296                                                                                | 0.76    | 2.09                                      |
| 3409                                                                                | 0.92    | 2.53                                      | 3353                                                                                | 1.37    | 3.77                                      | 3346                                                                                | 0.76    | 2.09                                      |
| 3459                                                                                | 0.92    | 2.54                                      | 3403                                                                                | 1.36    | 3.72                                      | 3396                                                                                | 0.79    | 2.16                                      |
| 3509                                                                                | 0.93    | 2.54                                      | 3453                                                                                | 1.21    | 3.33                                      | 3446                                                                                | 0.80    | 2.20                                      |
| 3559                                                                                | 0.92    | 2.53                                      | 3503                                                                                | 1.32    | 3.63                                      | 3496                                                                                | 0.79    | 2.16                                      |
| 3609                                                                                | 0.93    | 2.55                                      | 3554                                                                                | 1.35    | 3.69                                      | 3546                                                                                | 0.78    | 2.13                                      |
| 3659                                                                                | 0.92    | 2.53                                      | 3604                                                                                | 1.35    | 3.70                                      | 3596                                                                                | 0.79    | 2.15                                      |
| 3709                                                                                | 0.92    | 2.53                                      | 3654                                                                                | 1.35    | 3.71                                      | 3646                                                                                | 0.78    | 2.13                                      |
| 3759                                                                                | 0.92    | 2.52                                      | 3704                                                                                | 1.32    | 3.61                                      | 3696                                                                                | 0.80    | 2.19                                      |

**Table S8.** Continued.

| $p_{\text{CO}_2} = 3.49 \text{ kPa}$<br>$p_{\text{H}_2\text{O}} = 2.39 \text{ kPa}$ |         |                                           | $p_{\text{CO}_2} = 34.9 \text{ kPa}$<br>$p_{\text{H}_2\text{O}} = 2.21 \text{ kPa}$ |         |                                           | $p_{\text{CO}_2} = 3.49 \text{ kPa}$<br>$p_{\text{H}_2\text{O}} = 2.21 \text{ kPa}$ |         |                                           |
|-------------------------------------------------------------------------------------|---------|-------------------------------------------|-------------------------------------------------------------------------------------|---------|-------------------------------------------|-------------------------------------------------------------------------------------|---------|-------------------------------------------|
| Cycle                                                                               | $n/n_0$ | $n^{\text{ads}}$<br>/mmol g <sup>-1</sup> | Cycle                                                                               | $n/n_0$ | $n^{\text{ads}}$<br>/mmol g <sup>-1</sup> | Cycle                                                                               | $n/n_0$ | $n^{\text{ads}}$<br>/mmol g <sup>-1</sup> |
| 3809                                                                                | 0.92    | 2.53                                      | 3754                                                                                | 1.35    | 3.71                                      | 3746                                                                                | 0.80    | 2.18                                      |
| 3859                                                                                | 0.93    | 2.54                                      | 3804                                                                                | 1.37    | 3.77                                      | 3796                                                                                | 0.78    | 2.14                                      |
| 3909                                                                                | 0.93    | 2.54                                      | 3854                                                                                | 1.41    | 3.87                                      | 3846                                                                                | 0.76    | 2.07                                      |
| 3959                                                                                | 0.93    | 2.55                                      | 3904                                                                                | 1.35    | 3.71                                      | 3896                                                                                | 0.79    | 2.17                                      |
| 4009                                                                                | 0.92    | 2.54                                      | 3954                                                                                | 1.43    | 3.91                                      | 3946                                                                                | 0.79    | 2.17                                      |
| 4059                                                                                | 0.92    | 2.53                                      | 4004                                                                                | 1.41    | 3.86                                      | 3996                                                                                | 0.81    | 2.21                                      |
| 4109                                                                                | 0.93    | 2.55                                      | 4057                                                                                | 1.42    | 3.88                                      | 4046                                                                                | 0.79    | 2.17                                      |
| 4159                                                                                | 0.93    | 2.54                                      | 4127                                                                                | 1.30    | 3.57                                      | 4096                                                                                | 0.73    | 2.01                                      |
| 4209                                                                                | 0.93    | 2.55                                      | 4229                                                                                | 1.44    | 3.94                                      | 4146                                                                                | 0.78    | 2.15                                      |
| 4259                                                                                | 0.93    | 2.55                                      | 4289                                                                                | 1.48    | 4.05                                      | 4196                                                                                | 0.78    | 2.14                                      |
| 4309                                                                                | 0.93    | 2.56                                      | 4379                                                                                | 1.48    | 4.07                                      | 4246                                                                                | 0.78    | 2.14                                      |
| 4354                                                                                | 0.93    | 2.56                                      | 4439                                                                                | 1.40    | 3.85                                      | 4296                                                                                | 0.74    | 2.03                                      |
| 4404                                                                                | 0.93    | 2.54                                      | 4504                                                                                | 1.39    | 3.80                                      | 4346                                                                                | 0.78    | 2.15                                      |
| 4454                                                                                | 0.92    | 2.53                                      | 4564                                                                                | 1.40    | 3.85                                      | 4396                                                                                | 0.75    | 2.07                                      |
| 4504                                                                                | 0.93    | 2.54                                      | 4629                                                                                | 1.39    | 3.82                                      | 4446                                                                                | 0.70    | 1.92                                      |
| 4554                                                                                | 0.93    | 2.55                                      | 4694                                                                                | 1.46    | 4.00                                      | 4496                                                                                | 0.70    | 1.93                                      |
| 4604                                                                                | 0.93    | 2.54                                      | 4844                                                                                | 1.51    | 4.15                                      | 4546                                                                                | 0.70    | 1.92                                      |
| 4654                                                                                | 0.93    | 2.54                                      | 5014                                                                                | 1.53    | 4.19                                      | 4596                                                                                | 0.72    | 1.98                                      |
| 4704                                                                                | 0.93    | 2.54                                      |                                                                                     |         |                                           | 4646                                                                                | 0.71    | 1.96                                      |
| 4749                                                                                | 0.93    | 2.55                                      |                                                                                     |         |                                           | 4696                                                                                | 0.68    | 1.86                                      |
| 4809                                                                                | 0.93    | 2.55                                      |                                                                                     |         |                                           | 4746                                                                                | 0.69    | 1.88                                      |
| 4859                                                                                | 0.93    | 2.55                                      |                                                                                     |         |                                           | 4796                                                                                | 0.70    | 1.92                                      |
| 4909                                                                                | 0.93    | 2.55                                      |                                                                                     |         |                                           | 4846                                                                                | 0.71    | 1.94                                      |
| 4959                                                                                | 0.93    | 2.54                                      |                                                                                     |         |                                           | 4896                                                                                | 0.71    | 1.94                                      |
| 5009                                                                                | 0.92    | 2.51                                      |                                                                                     |         |                                           | 4946                                                                                | 0.67    | 1.85                                      |
| 5059                                                                                | 0.92    | 2.53                                      |                                                                                     |         |                                           | 4996                                                                                | 0.70    | 1.93                                      |
| 5109                                                                                | 0.93    | 2.55                                      |                                                                                     |         |                                           | 5046                                                                                | 0.70    | 1.91                                      |
| 5159                                                                                | 0.93    | 2.54                                      |                                                                                     |         |                                           | 5096                                                                                | 0.70    | 1.91                                      |
| 5209                                                                                | 0.92    | 2.53                                      |                                                                                     |         |                                           | 5146                                                                                | 0.70    | 1.91                                      |
| 5259                                                                                | 0.92    | 2.53                                      |                                                                                     |         |                                           | 5186                                                                                | 0.70    | 1.91                                      |
| 5309                                                                                | 0.92    | 2.51                                      |                                                                                     |         |                                           |                                                                                     |         |                                           |
| 5359                                                                                | 0.93    | 2.54                                      |                                                                                     |         |                                           |                                                                                     |         |                                           |
| 5379                                                                                | 0.92    | 2.53                                      |                                                                                     |         |                                           |                                                                                     |         |                                           |

**Table S9. 6.0 nm pore silica capacities for the dry gas regeneration experiments.**

| $p_{\text{CO}_2} = 3.49 \text{ kPa}$<br>$p_{\text{H}_2\text{O}} = 2.39 \text{ kPa}$ |         |                                           | $p_{\text{CO}_2} = 34.9 \text{ kPa}$<br>$p_{\text{H}_2\text{O}} = 2.21 \text{ kPa}$ |         |                                           | $p_{\text{CO}_2} = 3.49 \text{ kPa}$<br>$p_{\text{H}_2\text{O}} = 2.21 \text{ kPa}$ |         |                                           |
|-------------------------------------------------------------------------------------|---------|-------------------------------------------|-------------------------------------------------------------------------------------|---------|-------------------------------------------|-------------------------------------------------------------------------------------|---------|-------------------------------------------|
| Cycle                                                                               | $n/n_0$ | $n^{\text{ads}}$<br>/mmol g <sup>-1</sup> | Cycle                                                                               | $n/n_0$ | $n^{\text{ads}}$<br>/mmol g <sup>-1</sup> | Cycle                                                                               | $n/n_0$ | $n^{\text{ads}}$<br>/mmol g <sup>-1</sup> |
| 50                                                                                  | 1.03    | 1.84                                      | 50                                                                                  | 1.00    | 1.80                                      | 45                                                                                  | 1.00    | 1.80                                      |
| 100                                                                                 | 1.03    | 1.85                                      | 100                                                                                 | 1.01    | 1.82                                      | 95                                                                                  | 1.01    | 1.82                                      |
| 150                                                                                 | 1.01    | 1.82                                      | 221                                                                                 | 1.02    | 1.83                                      | 145                                                                                 | 1.00    | 1.80                                      |
| 200                                                                                 | 0.97    | 1.74                                      | 271                                                                                 | 1.01    | 1.82                                      | 195                                                                                 | 1.00    | 1.81                                      |
| 250                                                                                 | 0.97    | 1.75                                      | 321                                                                                 | 1.00    | 1.80                                      | 245                                                                                 | 1.00    | 1.80                                      |
| 300                                                                                 | 0.99    | 1.78                                      | 371                                                                                 | 1.00    | 1.80                                      | 316                                                                                 | 1.01    | 1.82                                      |
| 350                                                                                 | 0.98    | 1.77                                      | 421                                                                                 | 1.00    | 1.80                                      | 366                                                                                 | 1.01    | 1.82                                      |
| 400                                                                                 | 0.98    | 1.76                                      | 471                                                                                 | 1.01    | 1.82                                      | 416                                                                                 | 1.01    | 1.82                                      |
| 450                                                                                 | 0.97    | 1.75                                      | 615                                                                                 | 1.01    | 1.82                                      | 466                                                                                 | 1.01    | 1.82                                      |
| 500                                                                                 | 0.99    | 1.77                                      | 665                                                                                 | 1.01    | 1.82                                      | 516                                                                                 | 1.00    | 1.80                                      |
| 550                                                                                 | 0.97    | 1.74                                      | 974                                                                                 | 1.00    | 1.80                                      | 566                                                                                 | 1.01    | 1.82                                      |
| 600                                                                                 | 0.98    | 1.75                                      | 1024                                                                                | 1.01    | 1.82                                      | 616                                                                                 | 1.00    | 1.79                                      |
| 650                                                                                 | 0.97    | 1.75                                      | 1074                                                                                | 1.01    | 1.81                                      | 666                                                                                 | 1.00    | 1.80                                      |
| 700                                                                                 | 0.96    | 1.73                                      | 1124                                                                                | 1.01    | 1.82                                      | 716                                                                                 | 1.00    | 1.79                                      |
| 750                                                                                 | 0.97    | 1.74                                      | 1174                                                                                | 1.01    | 1.81                                      | 766                                                                                 | 1.00    | 1.79                                      |
| 809                                                                                 | 0.97    | 1.75                                      | 1404                                                                                | 1.00    | 1.81                                      | 816                                                                                 | 1.01    | 1.82                                      |
| 859                                                                                 | 0.97    | 1.74                                      | 1454                                                                                | 1.01    | 1.82                                      | 866                                                                                 | 1.01    | 1.81                                      |
| 909                                                                                 | 0.96    | 1.72                                      | 1504                                                                                | 1.01    | 1.82                                      | 916                                                                                 | 1.02    | 1.83                                      |
| 959                                                                                 | 0.96    | 1.73                                      | 1554                                                                                | 1.01    | 1.81                                      | 966                                                                                 | 1.01    | 1.81                                      |
| 1009                                                                                | 0.95    | 1.71                                      | 1604                                                                                | 1.00    | 1.81                                      | 1016                                                                                | 1.01    | 1.82                                      |
| 1059                                                                                | 0.97    | 1.75                                      | 1654                                                                                | 1.00    | 1.80                                      | 1066                                                                                | 1.01    | 1.81                                      |
| 1109                                                                                | 0.98    | 1.76                                      | 1704                                                                                | 1.01    | 1.81                                      | 1116                                                                                | 1.01    | 1.82                                      |
| 1159                                                                                | 0.99    | 1.77                                      | 1754                                                                                | 1.01    | 1.81                                      | 1166                                                                                | 1.01    | 1.82                                      |
| 1209                                                                                | 0.97    | 1.75                                      | 1804                                                                                | 1.01    | 1.81                                      | 1216                                                                                | 1.01    | 1.82                                      |
| 1259                                                                                | 0.97    | 1.75                                      | 1854                                                                                | 1.01    | 1.82                                      | 1266                                                                                | 1.01    | 1.81                                      |
| 1309                                                                                | 0.97    | 1.74                                      | 1904                                                                                | 1.01    | 1.82                                      | 1316                                                                                | 1.01    | 1.82                                      |
| 1359                                                                                | 0.98    | 1.76                                      | 1954                                                                                | 1.02    | 1.83                                      | 1366                                                                                | 1.01    | 1.82                                      |
| 1409                                                                                | 0.97    | 1.75                                      | 2074                                                                                | 1.01    | 1.82                                      | 1416                                                                                | 1.02    | 1.83                                      |
| 1459                                                                                | 0.96    | 1.72                                      | 2124                                                                                | 1.01    | 1.82                                      | 1466                                                                                | 1.03    | 1.84                                      |
| 1509                                                                                | 0.98    | 1.76                                      | 2175                                                                                | 1.02    | 1.83                                      | 1516                                                                                | 1.01    | 1.83                                      |
| 1559                                                                                | 0.96    | 1.73                                      | 2225                                                                                | 1.02    | 1.83                                      | 1566                                                                                | 1.01    | 1.82                                      |
| 1609                                                                                | 0.96    | 1.72                                      | 2275                                                                                | 1.01    | 1.82                                      | 1616                                                                                | 1.00    | 1.79                                      |
| 1659                                                                                | 0.97    | 1.75                                      | 2325                                                                                | 1.01    | 1.81                                      | 1666                                                                                | 1.00    | 1.80                                      |
| 1709                                                                                | 0.97    | 1.74                                      | 2375                                                                                | 1.00    | 1.81                                      | 1716                                                                                | 0.99    | 1.79                                      |
| 1759                                                                                | 0.96    | 1.73                                      | 2425                                                                                | 1.01    | 1.81                                      | 1766                                                                                | 1.00    | 1.79                                      |
| 1809                                                                                | 0.97    | 1.74                                      | 2475                                                                                | 1.01    | 1.82                                      | 1816                                                                                | 1.01    | 1.82                                      |
| 1859                                                                                | 0.96    | 1.72                                      | 2525                                                                                | 1.01    | 1.82                                      | 1866                                                                                | 1.02    | 1.83                                      |

**Table S9.** Continued.

| $p_{\text{CO}_2} = 3.49 \text{ kPa}$<br>$p_{\text{H}_2\text{O}} = 2.39 \text{ kPa}$ |         |                                           | $p_{\text{CO}_2} = 34.9 \text{ kPa}$<br>$p_{\text{H}_2\text{O}} = 2.21 \text{ kPa}$ |         |                                           | $p_{\text{CO}_2} = 3.49 \text{ kPa}$<br>$p_{\text{H}_2\text{O}} = 2.21 \text{ kPa}$ |         |                                           |
|-------------------------------------------------------------------------------------|---------|-------------------------------------------|-------------------------------------------------------------------------------------|---------|-------------------------------------------|-------------------------------------------------------------------------------------|---------|-------------------------------------------|
| Cycle                                                                               | $n/n_0$ | $n^{\text{ads}}$<br>/mmol g <sup>-1</sup> | Cycle                                                                               | $n/n_0$ | $n^{\text{ads}}$<br>/mmol g <sup>-1</sup> | Cycle                                                                               | $n/n_0$ | $n^{\text{ads}}$<br>/mmol g <sup>-1</sup> |
| 1909                                                                                | 0.95    | 1.70                                      | 2575                                                                                | 1.01    | 1.82                                      | 1916                                                                                | 1.01    | 1.82                                      |
| 1959                                                                                | 0.95    | 1.71                                      | 2625                                                                                | 1.02    | 1.83                                      | 1966                                                                                | 1.00    | 1.80                                      |
| 2413                                                                                | 0.96    | 1.73                                      | 2675                                                                                | 1.02    | 1.83                                      | 2016                                                                                | 1.00    | 1.81                                      |
| 2463                                                                                | 0.96    | 1.73                                      | 2725                                                                                | 1.01    | 1.82                                      | 2066                                                                                | 1.00    | 1.79                                      |
| 2513                                                                                | 0.95    | 1.71                                      | 2775                                                                                | 1.01    | 1.82                                      | 2116                                                                                | 1.00    | 1.81                                      |
| 2563                                                                                | 0.94    | 1.68                                      | 2826                                                                                | 1.02    | 1.83                                      | 2166                                                                                | 1.01    | 1.81                                      |
| 2613                                                                                | 0.93    | 1.68                                      | 2876                                                                                | 1.03    | 1.85                                      | 2216                                                                                | 1.00    | 1.80                                      |
| 2663                                                                                | 0.95    | 1.71                                      | 2926                                                                                | 1.02    | 1.84                                      | 2266                                                                                | 1.01    | 1.82                                      |
| 2713                                                                                | 0.94    | 1.70                                      | 2976                                                                                | 1.02    | 1.83                                      | 2316                                                                                | 1.00    | 1.80                                      |
| 2763                                                                                | 0.93    | 1.68                                      | 3026                                                                                | 1.02    | 1.83                                      | 2366                                                                                | 1.01    | 1.81                                      |
| 2813                                                                                | 0.93    | 1.68                                      | 3076                                                                                | 1.01    | 1.82                                      | 2416                                                                                | 1.00    | 1.80                                      |
| 2863                                                                                | 0.93    | 1.68                                      | 3135                                                                                | 1.02    | 1.83                                      | 2466                                                                                | 1.01    | 1.82                                      |
| 2913                                                                                | 0.92    | 1.66                                      | 3185                                                                                | 1.02    | 1.84                                      | 2516                                                                                | 1.00    | 1.80                                      |
| 2963                                                                                | 0.93    | 1.67                                      | 3235                                                                                | 1.02    | 1.84                                      | 2566                                                                                | 0.99    | 1.79                                      |
| 3013                                                                                | 0.93    | 1.68                                      | 3285                                                                                | 1.02    | 1.83                                      | 2616                                                                                | 0.99    | 1.78                                      |
| 3063                                                                                | 0.93    | 1.66                                      | 3335                                                                                | 1.02    | 1.83                                      | 2666                                                                                | 0.99    | 1.78                                      |
| 3113                                                                                | 0.92    | 1.66                                      | 3385                                                                                | 1.01    | 1.82                                      | 2716                                                                                | 1.00    | 1.79                                      |
| 3163                                                                                | 0.91    | 1.64                                      | 3435                                                                                | 1.02    | 1.83                                      | 2766                                                                                | 0.99    | 1.77                                      |
| 3213                                                                                | 0.91    | 1.64                                      | 3485                                                                                | 1.03    | 1.85                                      | 2816                                                                                | 0.99    | 1.77                                      |
| 3263                                                                                | 0.92    | 1.65                                      | 3535                                                                                | 1.02    | 1.84                                      | 2866                                                                                | 0.98    | 1.76                                      |
| 3313                                                                                | 0.91    | 1.64                                      | 3585                                                                                | 1.02    | 1.83                                      | 2916                                                                                | 1.00    | 1.80                                      |
| 3363                                                                                | 0.92    | 1.65                                      | 3635                                                                                | 1.02    | 1.83                                      | 2966                                                                                | 0.98    | 1.77                                      |
| 3413                                                                                | 0.91    | 1.65                                      | 3685                                                                                | 1.02    | 1.83                                      | 3016                                                                                | 0.97    | 1.75                                      |
| 3463                                                                                | 0.92    | 1.66                                      | 3735                                                                                | 1.02    | 1.83                                      | 3066                                                                                | 0.96    | 1.73                                      |
| 3513                                                                                | 0.91    | 1.63                                      | 3791                                                                                | 1.01    | 1.82                                      | 3116                                                                                | 0.97    | 1.74                                      |
| 3563                                                                                | 0.90    | 1.63                                      | 3841                                                                                | 1.02    | 1.83                                      | 3166                                                                                | 0.97    | 1.74                                      |
| 3613                                                                                | 0.92    | 1.65                                      | 3896                                                                                | 1.02    | 1.83                                      | 3216                                                                                | 0.97    | 1.75                                      |
| 3663                                                                                | 0.93    | 1.67                                      | 3946                                                                                | 1.02    | 1.84                                      | 3266                                                                                | 0.97    | 1.74                                      |
| 3713                                                                                | 0.93    | 1.68                                      | 3996                                                                                | 1.03    | 1.85                                      | 3316                                                                                | 0.98    | 1.76                                      |
| 3763                                                                                | 0.93    | 1.67                                      | 4046                                                                                | 1.03    | 1.85                                      | 3366                                                                                | 0.97    | 1.74                                      |
| 3813                                                                                | 0.93    | 1.67                                      | 4096                                                                                | 1.03    | 1.85                                      | 3416                                                                                | 0.96    | 1.73                                      |
| 3863                                                                                | 0.92    | 1.65                                      | 4340                                                                                | 1.03    | 1.85                                      | 3466                                                                                | 0.96    | 1.73                                      |
| 3913                                                                                | 0.92    | 1.66                                      | 4390                                                                                | 1.03    | 1.85                                      | 3516                                                                                | 0.96    | 1.72                                      |
| 3963                                                                                | 0.91    | 1.64                                      | 4440                                                                                | 1.03    | 1.86                                      | 3566                                                                                | 0.95    | 1.72                                      |
| 4013                                                                                | 0.91    | 1.63                                      | 4490                                                                                | 1.03    | 1.86                                      | 3616                                                                                | 0.95    | 1.71                                      |
| 4063                                                                                | 0.91    | 1.64                                      | 4540                                                                                | 1.03    | 1.85                                      | 3666                                                                                | 0.93    | 1.67                                      |
| 4113                                                                                | 0.91    | 1.64                                      | 4590                                                                                | 1.02    | 1.84                                      | 3716                                                                                | 0.95    | 1.71                                      |

**Table S9.** Continued.

| $p_{\text{CO}_2} = 3.49 \text{ kPa}$<br>$p_{\text{H}_2\text{O}} = 2.39 \text{ kPa}$ |         |                                           | $p_{\text{CO}_2} = 34.9 \text{ kPa}$<br>$p_{\text{H}_2\text{O}} = 2.21 \text{ kPa}$ |         |                                           | $p_{\text{CO}_2} = 3.49 \text{ kPa}$<br>$p_{\text{H}_2\text{O}} = 2.21 \text{ kPa}$ |         |                                           |
|-------------------------------------------------------------------------------------|---------|-------------------------------------------|-------------------------------------------------------------------------------------|---------|-------------------------------------------|-------------------------------------------------------------------------------------|---------|-------------------------------------------|
| Cycle                                                                               | $n/n_0$ | $n^{\text{ads}}$<br>/mmol g <sup>-1</sup> | Cycle                                                                               | $n/n_0$ | $n^{\text{ads}}$<br>/mmol g <sup>-1</sup> | Cycle                                                                               | $n/n_0$ | $n^{\text{ads}}$<br>/mmol g <sup>-1</sup> |
| 4113                                                                                | 0.91    | 1.64                                      | 4590                                                                                | 1.02    | 1.84                                      | 3716                                                                                | 0.95    | 1.71                                      |
| 4163                                                                                | 0.90    | 1.63                                      | 4640                                                                                | 1.02    | 1.84                                      | 3766                                                                                | 0.95    | 1.70                                      |
| 4213                                                                                | 0.92    | 1.65                                      | 4690                                                                                | 1.02    | 1.84                                      | 3816                                                                                | 0.94    | 1.69                                      |
| 4263                                                                                | 0.91    | 1.63                                      | 4740                                                                                | 1.03    | 1.85                                      | 3866                                                                                | 0.94    | 1.69                                      |
| 4317                                                                                | 0.91    | 1.63                                      | 4790                                                                                | 1.04    | 1.86                                      | 3916                                                                                | 0.93    | 1.67                                      |
| 4367                                                                                | 0.92    | 1.65                                      | 4840                                                                                | 1.04    | 1.86                                      | 3966                                                                                | 0.94    | 1.68                                      |
| 4417                                                                                | 0.93    | 1.66                                      | 4890                                                                                | 1.03    | 1.86                                      | 4016                                                                                | 0.94    | 1.68                                      |
| 4467                                                                                | 0.92    | 1.65                                      | 5002                                                                                | 1.03    | 1.86                                      | 4066                                                                                | 0.93    | 1.68                                      |
| 4517                                                                                | 0.92    | 1.66                                      | 5052                                                                                | 1.03    | 1.85                                      | 4116                                                                                | 0.93    | 1.68                                      |
| 4567                                                                                | 0.91    | 1.64                                      | 5097                                                                                | 1.03    | 1.85                                      | 4166                                                                                | 0.93    | 1.67                                      |
| 4617                                                                                | 0.93    | 1.68                                      |                                                                                     |         |                                           | 4216                                                                                | 0.92    | 1.65                                      |
| 4669                                                                                | 0.93    | 1.68                                      |                                                                                     |         |                                           | 4266                                                                                | 0.92    | 1.65                                      |
| 4719                                                                                | 0.91    | 1.64                                      |                                                                                     |         |                                           | 4316                                                                                | 0.91    | 1.64                                      |
| 4769                                                                                | 0.90    | 1.62                                      |                                                                                     |         |                                           | 4366                                                                                | 0.91    | 1.63                                      |
| 4819                                                                                | 0.90    | 1.63                                      |                                                                                     |         |                                           | 4416                                                                                | 0.90    | 1.62                                      |
| 4869                                                                                | 0.92    | 1.65                                      |                                                                                     |         |                                           | 4466                                                                                | 0.92    | 1.65                                      |
| 4919                                                                                | 0.92    | 1.65                                      |                                                                                     |         |                                           | 4516                                                                                | 0.91    | 1.64                                      |
| 4969                                                                                | 0.91    | 1.63                                      |                                                                                     |         |                                           | 4566                                                                                | 0.90    | 1.63                                      |
| 5019                                                                                | 0.91    | 1.63                                      |                                                                                     |         |                                           | 4616                                                                                | 0.90    | 1.62                                      |
| 5069                                                                                | 0.91    | 1.64                                      |                                                                                     |         |                                           | 4666                                                                                | 0.91    | 1.63                                      |
| 5119                                                                                | 0.92    | 1.66                                      |                                                                                     |         |                                           | 4716                                                                                | 0.90    | 1.62                                      |
| 5169                                                                                | 0.92    | 1.65                                      |                                                                                     |         |                                           | 4766                                                                                | 0.91    | 1.63                                      |
|                                                                                     |         |                                           |                                                                                     |         |                                           | 4816                                                                                | 0.91    | 1.63                                      |
|                                                                                     |         |                                           |                                                                                     |         |                                           | 4866                                                                                | 0.92    | 1.65                                      |
|                                                                                     |         |                                           |                                                                                     |         |                                           | 4916                                                                                | 0.91    | 1.64                                      |
|                                                                                     |         |                                           |                                                                                     |         |                                           | 4966                                                                                | 0.91    | 1.64                                      |
|                                                                                     |         |                                           |                                                                                     |         |                                           | 5016                                                                                | 0.90    | 1.62                                      |
|                                                                                     |         |                                           |                                                                                     |         |                                           | 5066                                                                                | 0.90    | 1.61                                      |
|                                                                                     |         |                                           |                                                                                     |         |                                           | 5116                                                                                | 0.90    | 1.62                                      |
|                                                                                     |         |                                           |                                                                                     |         |                                           | 5166                                                                                | 0.90    | 1.62                                      |
|                                                                                     |         |                                           |                                                                                     |         |                                           | 5236                                                                                | 0.90    | 1.61                                      |

**Table S10.** 6.0 nm pore silica capacities for the wet gas regeneration experiments.

| $p_{\text{CO}_2} = 3.49 \text{ kPa}$<br>$p_{\text{H}_2\text{O}} = 2.39 \text{ kPa}$ |         |                                           | $p_{\text{CO}_2} = 34.9 \text{ kPa}$<br>$p_{\text{H}_2\text{O}} = 2.21 \text{ kPa}$ |         |                                           | $p_{\text{CO}_2} = 3.49 \text{ kPa}$<br>$p_{\text{H}_2\text{O}} = 2.21 \text{ kPa}$ |         |                                           |
|-------------------------------------------------------------------------------------|---------|-------------------------------------------|-------------------------------------------------------------------------------------|---------|-------------------------------------------|-------------------------------------------------------------------------------------|---------|-------------------------------------------|
| Cycle                                                                               | $n/n_0$ | $n^{\text{ads}}$<br>/mmol g <sup>-1</sup> | Cycle                                                                               | $n/n_0$ | $n^{\text{ads}}$<br>/mmol g <sup>-1</sup> | Cycle                                                                               | $n/n_0$ | $n^{\text{ads}}$<br>/mmol g <sup>-1</sup> |
| 50                                                                                  | 1.00    | 1.80                                      | 50                                                                                  | 1.00    | 1.80                                      | 45                                                                                  | 1.00    | 1.80                                      |
| 100                                                                                 | 0.99    | 1.79                                      | 100                                                                                 | 1.00    | 1.80                                      | 95                                                                                  | 1.02    | 1.83                                      |
| 150                                                                                 | 0.99    | 1.78                                      | 150                                                                                 | 1.00    | 1.80                                      | 145                                                                                 | 1.00    | 1.81                                      |
| 200                                                                                 | 1.00    | 1.80                                      | 200                                                                                 | 1.00    | 1.80                                      | 195                                                                                 | 1.01    | 1.81                                      |
| 250                                                                                 | 1.00    | 1.79                                      | 250                                                                                 | 1.01    | 1.81                                      | 245                                                                                 | 0.99    | 1.79                                      |
| 300                                                                                 | 1.00    | 1.79                                      | 300                                                                                 | 1.01    | 1.81                                      | 295                                                                                 | 1.02    | 1.83                                      |
| 350                                                                                 | 1.00    | 1.79                                      | 350                                                                                 | 1.01    | 1.81                                      | 345                                                                                 | 1.01    | 1.81                                      |
| 400                                                                                 | 1.00    | 1.79                                      | 400                                                                                 | 1.01    | 1.81                                      | 395                                                                                 | 1.02    | 1.83                                      |
| 450                                                                                 | 1.00    | 1.80                                      | 450                                                                                 | 1.01    | 1.81                                      | 445                                                                                 | 1.01    | 1.82                                      |
| 500                                                                                 | 0.99    | 1.79                                      | 500                                                                                 | 1.01    | 1.81                                      | 495                                                                                 | 1.01    | 1.81                                      |
| 550                                                                                 | 0.99    | 1.79                                      | 550                                                                                 | 1.01    | 1.81                                      | 545                                                                                 | 1.00    | 1.80                                      |
| 600                                                                                 | 1.00    | 1.79                                      | 600                                                                                 | 1.01    | 1.81                                      | 595                                                                                 | 1.00    | 1.81                                      |
| 650                                                                                 | 1.00    | 1.79                                      | 650                                                                                 | 1.01    | 1.81                                      | 645                                                                                 | 1.01    | 1.82                                      |
| 700                                                                                 | 0.99    | 1.79                                      | 700                                                                                 | 1.01    | 1.82                                      | 695                                                                                 | 1.01    | 1.81                                      |
| 750                                                                                 | 0.99    | 1.79                                      | 750                                                                                 | 1.01    | 1.82                                      | 745                                                                                 | 0.99    | 1.78                                      |
| 800                                                                                 | 0.99    | 1.78                                      | 800                                                                                 | 1.01    | 1.82                                      | 795                                                                                 | 1.00    | 1.80                                      |
| 850                                                                                 | 0.99    | 1.78                                      | 850                                                                                 | 1.02    | 1.83                                      | 845                                                                                 | 1.00    | 1.80                                      |
| 900                                                                                 | 0.99    | 1.78                                      | 900                                                                                 | 1.02    | 1.84                                      | 895                                                                                 | 1.00    | 1.79                                      |
| 950                                                                                 | 0.99    | 1.77                                      | 950                                                                                 | 1.01    | 1.82                                      | 945                                                                                 | 0.98    | 1.77                                      |
| 1000                                                                                | 0.99    | 1.77                                      | 1000                                                                                | 1.02    | 1.83                                      | 995                                                                                 | 0.99    | 1.78                                      |
| 1050                                                                                | 0.98    | 1.77                                      | 1050                                                                                | 1.01    | 1.82                                      | 1045                                                                                | 0.99    | 1.78                                      |
| 1100                                                                                | 0.98    | 1.77                                      | 1100                                                                                | 1.02    | 1.83                                      | 1095                                                                                | 0.98    | 1.76                                      |
| 1150                                                                                | 0.98    | 1.76                                      | 1150                                                                                | 1.02    | 1.83                                      | 1145                                                                                | 0.99    | 1.79                                      |
| 1200                                                                                | 0.98    | 1.76                                      | 1200                                                                                | 1.02    | 1.84                                      | 1195                                                                                | 0.98    | 1.76                                      |
| 1250                                                                                | 0.98    | 1.75                                      | 1250                                                                                | 1.02    | 1.84                                      | 1245                                                                                | 0.98    | 1.76                                      |
| 1300                                                                                | 0.98    | 1.75                                      | 1300                                                                                | 1.02    | 1.84                                      | 1295                                                                                | 0.98    | 1.76                                      |
| 1350                                                                                | 0.97    | 1.75                                      | 1350                                                                                | 1.03    | 1.85                                      | 1345                                                                                | 0.98    | 1.77                                      |
| 1400                                                                                | 0.97    | 1.75                                      | 1400                                                                                | 1.03    | 1.85                                      | 1395                                                                                | 0.99    | 1.77                                      |
| 1450                                                                                | 0.97    | 1.75                                      | 1450                                                                                | 1.02    | 1.84                                      | 1445                                                                                | 0.99    | 1.77                                      |
| 1500                                                                                | 0.97    | 1.74                                      | 1500                                                                                | 1.03    | 1.85                                      | 1495                                                                                | 0.96    | 1.73                                      |
| 1580                                                                                | 0.97    | 1.74                                      | 1550                                                                                | 1.03    | 1.86                                      | 1545                                                                                | 0.97    | 1.74                                      |
| 1630                                                                                | 0.97    | 1.74                                      | 1600                                                                                | 1.03    | 1.86                                      | 1595                                                                                | 0.96    | 1.72                                      |
| 1680                                                                                | 0.96    | 1.73                                      | 1650                                                                                | 1.04    | 1.86                                      | 1645                                                                                | 0.96    | 1.72                                      |
| 1730                                                                                | 0.96    | 1.73                                      | 1700                                                                                | 1.04    | 1.87                                      | 1695                                                                                | 0.98    | 1.75                                      |
| 1780                                                                                | 0.96    | 1.73                                      | 1750                                                                                | 1.04    | 1.87                                      | 1745                                                                                | 0.97    | 1.74                                      |
| 1830                                                                                | 0.96    | 1.72                                      | 1800                                                                                | 1.04    | 1.87                                      | 1795                                                                                | 0.97    | 1.75                                      |
| 1880                                                                                | 0.96    | 1.72                                      | 1850                                                                                | 1.04    | 1.87                                      | 1845                                                                                | 0.99    | 1.78                                      |

**Table S10.** Continued.

| $p_{\text{CO}_2} = 3.49 \text{ kPa}$<br>$p_{\text{H}_2\text{O}} = 2.39 \text{ kPa}$ |         |                                           | $p_{\text{CO}_2} = 34.9 \text{ kPa}$<br>$p_{\text{H}_2\text{O}} = 2.21 \text{ kPa}$ |         |                                           | $p_{\text{CO}_2} = 3.49 \text{ kPa}$<br>$p_{\text{H}_2\text{O}} = 2.21 \text{ kPa}$ |         |                                           |
|-------------------------------------------------------------------------------------|---------|-------------------------------------------|-------------------------------------------------------------------------------------|---------|-------------------------------------------|-------------------------------------------------------------------------------------|---------|-------------------------------------------|
| Cycle                                                                               | $n/n_0$ | $n^{\text{ads}}$<br>/mmol g <sup>-1</sup> | Cycle                                                                               | $n/n_0$ | $n^{\text{ads}}$<br>/mmol g <sup>-1</sup> | Cycle                                                                               | $n/n_0$ | $n^{\text{ads}}$<br>/mmol g <sup>-1</sup> |
| 1930                                                                                | 0.96    | 1.72                                      | 1900                                                                                | 1.04    | 1.87                                      | 1895                                                                                | 0.98    | 1.76                                      |
| 2000                                                                                | 0.95    | 1.72                                      | 1950                                                                                | 1.03    | 1.85                                      | 1945                                                                                | 0.96    | 1.73                                      |
| 2050                                                                                | 0.95    | 1.71                                      | 2000                                                                                | 1.04    | 1.86                                      | 1995                                                                                | 0.96    | 1.72                                      |
| 2100                                                                                | 0.95    | 1.71                                      | 2050                                                                                | 1.04    | 1.87                                      | 2045                                                                                | 0.95    | 1.71                                      |
| 2150                                                                                | 0.95    | 1.71                                      | 2100                                                                                | 1.04    | 1.88                                      | 2095                                                                                | 0.98    | 1.76                                      |
| 2200                                                                                | 0.95    | 1.71                                      | 2150                                                                                | 1.05    | 1.89                                      | 2145                                                                                | 0.97    | 1.75                                      |
| 2250                                                                                | 0.95    | 1.72                                      | 2206                                                                                | 1.04    | 1.87                                      | 2195                                                                                | 0.96    | 1.73                                      |
| 2300                                                                                | 0.95    | 1.71                                      | 2256                                                                                | 1.04    | 1.87                                      | 2245                                                                                | 0.94    | 1.70                                      |
| 2350                                                                                | 0.96    | 1.72                                      | 2307                                                                                | 1.04    | 1.88                                      | 2295                                                                                | 0.96    | 1.73                                      |
| 2400                                                                                | 0.95    | 1.71                                      | 2357                                                                                | 1.04    | 1.87                                      | 2345                                                                                | 0.95    | 1.71                                      |
| 2455                                                                                | 0.95    | 1.71                                      | 2407                                                                                | 1.04    | 1.87                                      | 2395                                                                                | 0.96    | 1.72                                      |
| 2505                                                                                | 0.95    | 1.71                                      | 2457                                                                                | 1.04    | 1.87                                      | 2445                                                                                | 0.96    | 1.72                                      |
| 2555                                                                                | 0.95    | 1.71                                      | 2507                                                                                | 1.05    | 1.89                                      | 2495                                                                                | 0.96    | 1.73                                      |
| 2609                                                                                | 0.95    | 1.71                                      | 2557                                                                                | 1.04    | 1.87                                      | 2545                                                                                | 0.96    | 1.73                                      |
| 2659                                                                                | 0.95    | 1.71                                      | 2607                                                                                | 1.04    | 1.88                                      | 2595                                                                                | 0.95    | 1.71                                      |
| 2709                                                                                | 0.95    | 1.71                                      | 2657                                                                                | 1.05    | 1.88                                      | 2645                                                                                | 0.96    | 1.73                                      |
| 2759                                                                                | 0.95    | 1.71                                      | 2707                                                                                | 1.05    | 1.89                                      | 2695                                                                                | 0.96    | 1.72                                      |
| 2809                                                                                | 0.95    | 1.71                                      | 2757                                                                                | 1.04    | 1.88                                      | 2745                                                                                | 0.96    | 1.72                                      |
| 2859                                                                                | 0.95    | 1.71                                      | 2807                                                                                | 1.05    | 1.88                                      | 2795                                                                                | 0.94    | 1.69                                      |
| 2909                                                                                | 0.95    | 1.71                                      | 2857                                                                                | 1.04    | 1.88                                      | 2845                                                                                | 0.95    | 1.71                                      |
| 2959                                                                                | 0.95    | 1.71                                      | 2907                                                                                | 1.05    | 1.88                                      | 2895                                                                                | 0.95    | 1.70                                      |
| 3009                                                                                | 0.95    | 1.71                                      | 2957                                                                                | 1.05    | 1.89                                      | 2946                                                                                | 0.95    | 1.71                                      |
| 3059                                                                                | 0.95    | 1.71                                      | 3008                                                                                | 1.05    | 1.89                                      | 2996                                                                                | 0.94    | 1.69                                      |
| 3109                                                                                | 0.95    | 1.71                                      | 3058                                                                                | 1.05    | 1.89                                      | 3046                                                                                | 0.95    | 1.71                                      |
| 3159                                                                                | 0.95    | 1.71                                      | 3108                                                                                | 1.05    | 1.89                                      | 3096                                                                                | 0.94    | 1.69                                      |
| 3209                                                                                | 0.95    | 1.71                                      | 3158                                                                                | 1.05    | 1.89                                      | 3146                                                                                | 0.93    | 1.68                                      |
| 3259                                                                                | 0.95    | 1.71                                      | 3208                                                                                | 1.06    | 1.90                                      | 3196                                                                                | 0.94    | 1.70                                      |
| 3309                                                                                | 0.95    | 1.71                                      | 3258                                                                                | 1.05    | 1.89                                      | 3246                                                                                | 0.94    | 1.69                                      |
| 3359                                                                                | 0.95    | 1.71                                      | 3308                                                                                | 1.06    | 1.90                                      | 3296                                                                                | 0.93    | 1.67                                      |
| 3409                                                                                | 0.95    | 1.71                                      | 3358                                                                                | 1.05    | 1.89                                      | 3346                                                                                | 0.92    | 1.65                                      |
| 3459                                                                                | 0.95    | 1.71                                      | 3408                                                                                | 1.05    | 1.89                                      | 3396                                                                                | 0.93    | 1.67                                      |
| 3509                                                                                | 0.95    | 1.70                                      | 3458                                                                                | 1.06    | 1.90                                      | 3446                                                                                | 0.91    | 1.64                                      |
| 3559                                                                                | 0.95    | 1.71                                      | 3508                                                                                | 1.05    | 1.89                                      | 3496                                                                                | 0.93    | 1.68                                      |
| 3609                                                                                | 0.95    | 1.70                                      | 3559                                                                                | 1.06    | 1.91                                      | 3546                                                                                | 0.93    | 1.67                                      |
| 3659                                                                                | 0.95    | 1.71                                      | 3609                                                                                | 1.05    | 1.89                                      | 3596                                                                                | 0.93    | 1.67                                      |
| 3709                                                                                | 0.95    | 1.71                                      | 3659                                                                                | 1.06    | 1.91                                      | 3646                                                                                | 0.94    | 1.68                                      |
| 3759                                                                                | 0.95    | 1.70                                      | 3709                                                                                | 1.06    | 1.91                                      | 3696                                                                                | 0.94    | 1.68                                      |
| 3809                                                                                | 0.95    | 1.71                                      | 3759                                                                                | 1.06    | 1.91                                      | 3746                                                                                | 0.93    | 1.67                                      |

**Table S10.** Continued.

| $p_{\text{CO}_2} = 3.49 \text{ kPa}$<br>$p_{\text{H}_2\text{O}} = 2.39 \text{ kPa}$ |         |                                           | $p_{\text{CO}_2} = 34.9 \text{ kPa}$<br>$p_{\text{H}_2\text{O}} = 2.21 \text{ kPa}$ |         |                                           | $p_{\text{CO}_2} = 3.49 \text{ kPa}$<br>$p_{\text{H}_2\text{O}} = 2.21 \text{ kPa}$ |         |                                           |
|-------------------------------------------------------------------------------------|---------|-------------------------------------------|-------------------------------------------------------------------------------------|---------|-------------------------------------------|-------------------------------------------------------------------------------------|---------|-------------------------------------------|
| Cycle                                                                               | $n/n_0$ | $n^{\text{ads}}$<br>/mmol g <sup>-1</sup> | Cycle                                                                               | $n/n_0$ | $n^{\text{ads}}$<br>/mmol g <sup>-1</sup> | Cycle                                                                               | $n/n_0$ | $n^{\text{ads}}$<br>/mmol g <sup>-1</sup> |
| 3859                                                                                | 0.95    | 1.71                                      | 3809                                                                                | 1.07    | 1.92                                      | 3796                                                                                | 0.93    | 1.67                                      |
| 3909                                                                                | 0.95    | 1.71                                      | 3859                                                                                | 1.06    | 1.91                                      | 3846                                                                                | 0.93    | 1.68                                      |
| 3959                                                                                | 0.95    | 1.71                                      | 3909                                                                                | 1.06    | 1.91                                      | 3896                                                                                | 0.93    | 1.67                                      |
| 4009                                                                                | 0.95    | 1.71                                      | 3959                                                                                | 1.06    | 1.91                                      | 3946                                                                                | 0.92    | 1.66                                      |
| 4059                                                                                | 0.95    | 1.70                                      | 4009                                                                                | 1.07    | 1.92                                      | 3996                                                                                | 0.93    | 1.68                                      |
| 4109                                                                                | 0.95    | 1.70                                      | 4062                                                                                | 1.07    | 1.93                                      | 4046                                                                                | 0.92    | 1.66                                      |
| 4159                                                                                | 0.95    | 1.71                                      | 4112                                                                                | 1.07    | 1.93                                      | 4096                                                                                | 0.91    | 1.64                                      |
| 4209                                                                                | 0.95    | 1.71                                      | 4164                                                                                | 1.07    | 1.92                                      | 4146                                                                                | 0.92    | 1.66                                      |
| 4259                                                                                | 0.95    | 1.71                                      | 4214                                                                                | 1.07    | 1.92                                      | 4196                                                                                | 0.94    | 1.69                                      |
| 4309                                                                                | 0.95    | 1.71                                      | 4264                                                                                | 1.08    | 1.94                                      | 4246                                                                                | 0.94    | 1.69                                      |
| 4359                                                                                | 0.95    | 1.71                                      | 4314                                                                                | 1.07    | 1.92                                      | 4296                                                                                | 0.92    | 1.66                                      |
| 4409                                                                                | 0.95    | 1.71                                      | 4364                                                                                | 1.08    | 1.93                                      | 4346                                                                                | 0.93    | 1.68                                      |
| 4459                                                                                | 0.95    | 1.71                                      | 4414                                                                                | 1.08    | 1.93                                      | 4396                                                                                | 0.91    | 1.64                                      |
| 4509                                                                                | 0.95    | 1.71                                      | 4464                                                                                | 1.08    | 1.95                                      | 4446                                                                                | 0.93    | 1.67                                      |
| 4559                                                                                | 0.95    | 1.71                                      | 4514                                                                                | 1.08    | 1.94                                      | 4496                                                                                | 0.90    | 1.62                                      |
| 4609                                                                                | 0.95    | 1.71                                      | 4564                                                                                | 1.08    | 1.95                                      | 4546                                                                                | 0.91    | 1.64                                      |
| 4659                                                                                | 0.95    | 1.71                                      | 4614                                                                                | 1.08    | 1.94                                      | 4596                                                                                | 0.91    | 1.64                                      |
| 4709                                                                                | 0.95    | 1.71                                      | 4664                                                                                | 1.08    | 1.94                                      | 4646                                                                                | 0.90    | 1.62                                      |
| 4759                                                                                | 0.95    | 1.71                                      | 4714                                                                                | 1.08    | 1.94                                      | 4696                                                                                | 0.90    | 1.62                                      |
| 4809                                                                                | 0.95    | 1.71                                      | 4764                                                                                | 1.08    | 1.94                                      | 4746                                                                                | 0.92    | 1.65                                      |
| 4859                                                                                | 0.95    | 1.71                                      | 4814                                                                                | 1.08    | 1.95                                      | 4796                                                                                | 0.91    | 1.64                                      |
| 4909                                                                                | 0.95    | 1.71                                      | 4864                                                                                | 1.08    | 1.95                                      | 4846                                                                                | 0.93    | 1.67                                      |
| 4959                                                                                | 0.95    | 1.71                                      | 4914                                                                                | 1.08    | 1.94                                      | 4896                                                                                | 0.92    | 1.65                                      |
| 5009                                                                                | 0.95    | 1.71                                      | 4964                                                                                | 1.08    | 1.95                                      | 4946                                                                                | 0.90    | 1.63                                      |
| 5059                                                                                | 0.95    | 1.71                                      | 5014                                                                                | 1.08    | 1.95                                      | 4996                                                                                | 0.90    | 1.62                                      |
| 5109                                                                                | 0.95    | 1.71                                      | 5069                                                                                | 1.08    | 1.95                                      | 5046                                                                                | 0.92    | 1.65                                      |
| 5159                                                                                | 0.95    | 1.71                                      |                                                                                     |         |                                           | 5096                                                                                | 0.93    | 1.67                                      |
| 5209                                                                                | 0.95    | 1.71                                      |                                                                                     |         |                                           | 5146                                                                                | 0.92    | 1.66                                      |
| 5259                                                                                | 0.95    | 1.71                                      |                                                                                     |         |                                           | 5186                                                                                | 0.92    | 1.65                                      |
| 5309                                                                                | 0.95    | 1.71                                      |                                                                                     |         |                                           |                                                                                     |         |                                           |
| 5359                                                                                | 0.95    | 1.71                                      |                                                                                     |         |                                           |                                                                                     |         |                                           |
| 5379                                                                                | 0.95    | 1.71                                      |                                                                                     |         |                                           |                                                                                     |         |                                           |



**Table S11. TGA water adsorption capacities of the desiccants.**

|                                                                     | Cycles | Zeolite 4A<br>$n^{\text{ads}}$<br>/mmol g <sup>-1</sup> | Zeolite<br>13X<br>$n^{\text{ads}}$<br>/mmol g <sup>-1</sup> | 2.2 nm<br>pore silica<br>$n^{\text{ads}}$<br>/mmol g <sup>-1</sup> | 3.0 nm<br>pore silica<br>$n^{\text{ads}}$<br>/mmol g <sup>-1</sup> | 6.0 nm<br>pore silica<br>$n^{\text{ads}}$<br>/mmol g <sup>-1</sup> |
|---------------------------------------------------------------------|--------|---------------------------------------------------------|-------------------------------------------------------------|--------------------------------------------------------------------|--------------------------------------------------------------------|--------------------------------------------------------------------|
| New Material                                                        | 0      | 13.5 ± 0.4                                              | 13.6 ± 1.1                                                  | 6.0 ± 0.7                                                          | 2.7 ± 0.2                                                          | 1.80 ± 0.07                                                        |
| Post 5,000 cycles of Dry Regeneration                               |        |                                                         |                                                             |                                                                    |                                                                    |                                                                    |
| $p_{\text{CO}_2} = 3.49$ kPa<br>$p_{\text{H}_2\text{O}} = 2.39$ kPa | 5169   | 13.0 ± 0.1                                              | 10.7 ± 1.0                                                  | 5.2 ± 0.5                                                          | 2.6 ± 0.3                                                          | 1.6 ± 0.1                                                          |
| $p_{\text{CO}_2} = 34.9$ kPa<br>$p_{\text{H}_2\text{O}} = 2.21$ kPa | 5097   | 12.8 ± 0.1                                              | 12.0 ± 0.4                                                  | 6.1 ± 0.7                                                          | 2.9 ± 0.3                                                          | 1.9 ± 0.3                                                          |
| $p_{\text{CO}_2} = 3.49$ kPa<br>$p_{\text{H}_2\text{O}} = 2.21$ kPa | 5236   | 11.6 ± 0.6                                              | 8.8 ± 1.5                                                   | 3.8 ± 0.6                                                          | 2.4 ± 0.6                                                          | 1.7 ± 0.6                                                          |
| Post 5,000 cycles of Wet Regeneration                               |        |                                                         |                                                             |                                                                    |                                                                    |                                                                    |
| $p_{\text{CO}_2} = 3.49$ kPa<br>$p_{\text{H}_2\text{O}} = 2.39$ kPa | 5379   | 13.3 ± 0.8                                              | 8.3 ± 1.3                                                   | 5.7 ± 0.2                                                          | 2.5 ± 0.1                                                          | 1.7 ± 0.1                                                          |
| $p_{\text{CO}_2} = 34.9$ kPa<br>$p_{\text{H}_2\text{O}} = 2.21$ kPa | 5069   | 13.4 ± 0.3                                              | 9.2 ± 0.6                                                   | 6.9 ± 1.5                                                          | 3.9 ± 0.1                                                          | 1.9 ± 0.1                                                          |
| $p_{\text{CO}_2} = 3.49$ kPa<br>$p_{\text{H}_2\text{O}} = 2.21$ kPa | 5186   | 12.4 ± 0.2                                              | 7.7 ± 1.2                                                   | 3.9 ± 0.1                                                          | 1.87 ± 0.06                                                        | 1.6 ± 0.4                                                          |

## N<sub>2</sub> physisorption

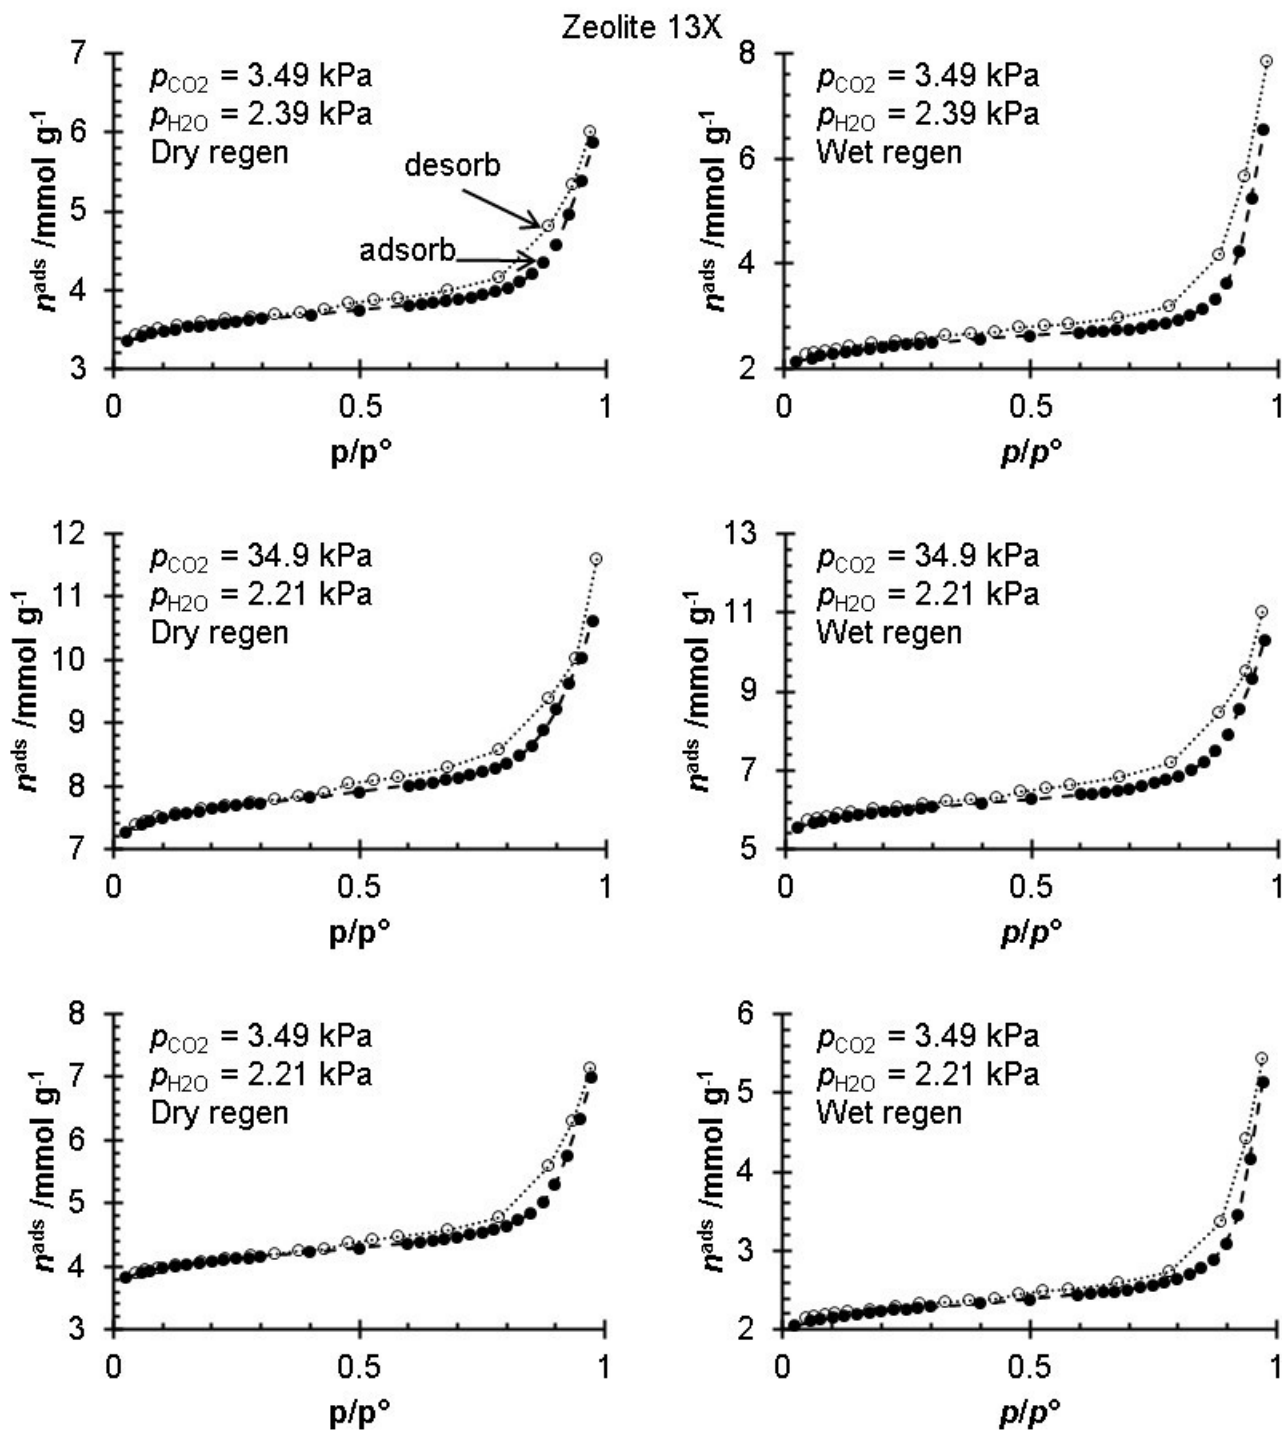

**Figure S1.** The N<sub>2</sub> adsorption (●, —) and desorption (○, - -) plots of the zeolite 13X samples after 5,000 TSA cycles.

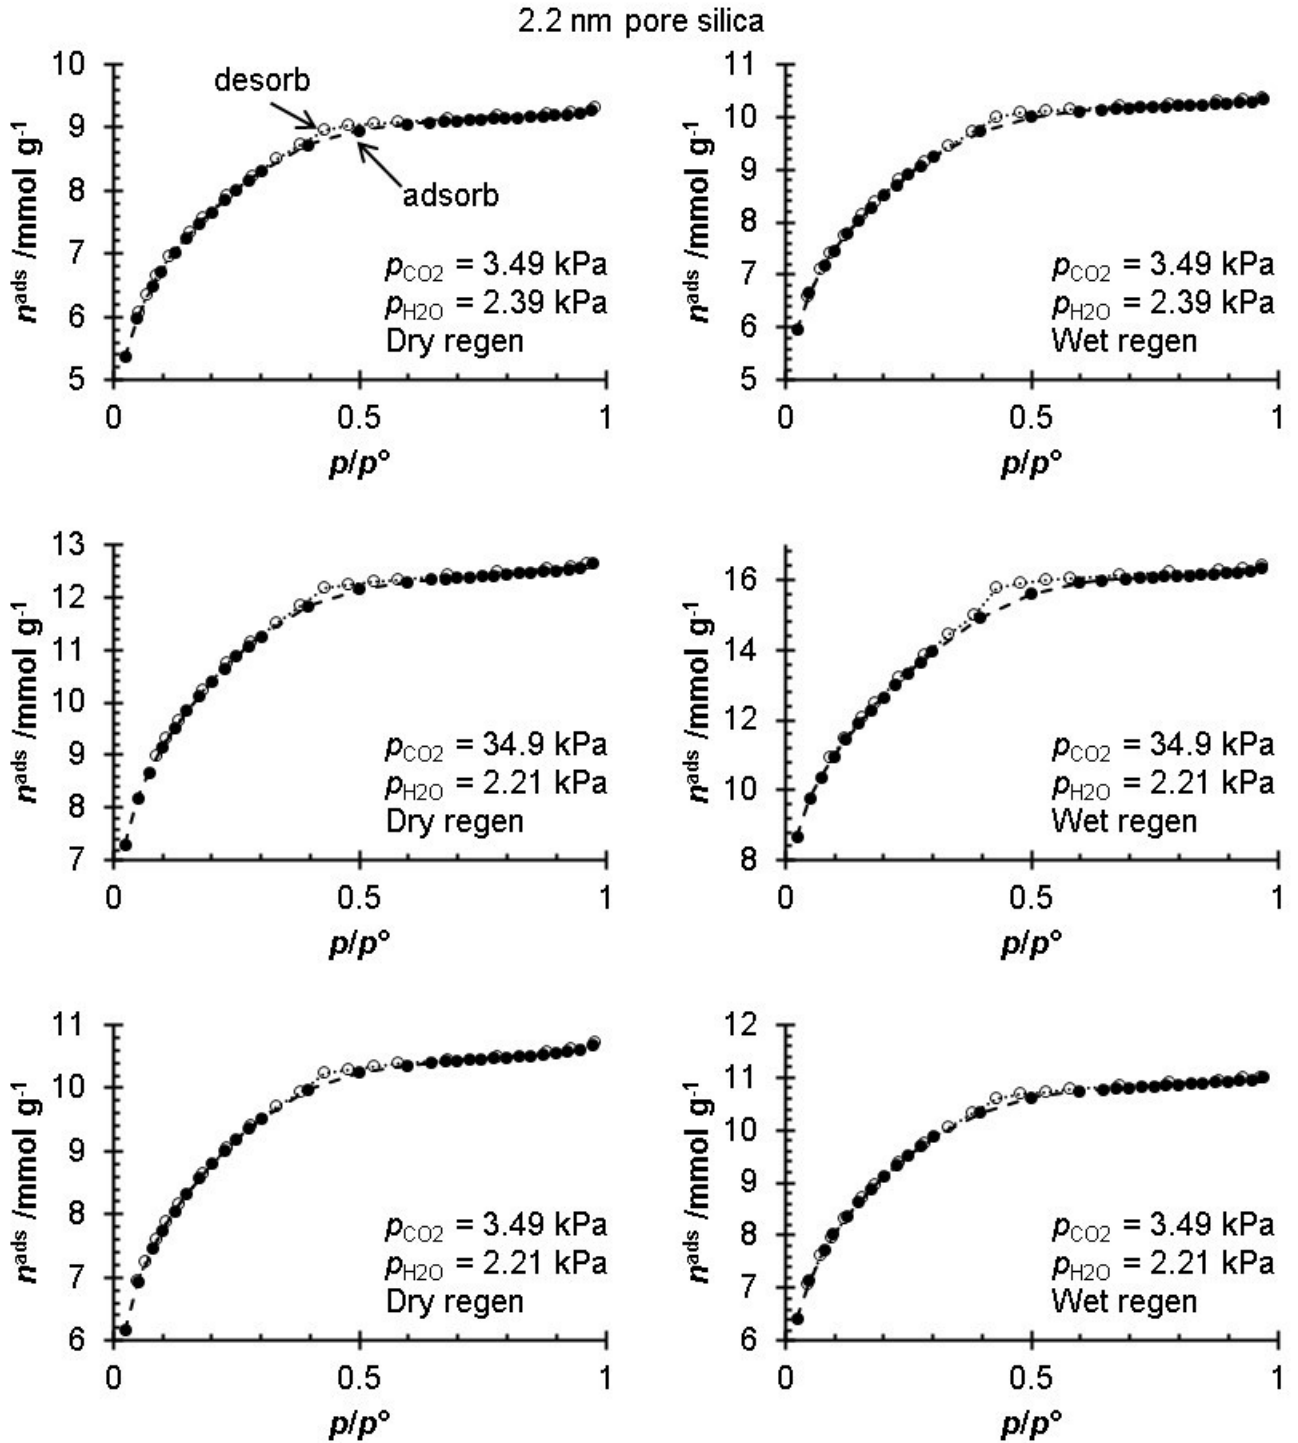

**Figure S2.** The N<sub>2</sub> adsorption (●, —) and desorption (○, - -) plots of the 2.2 nm pore silica samples after 5,000 TSA cycles.

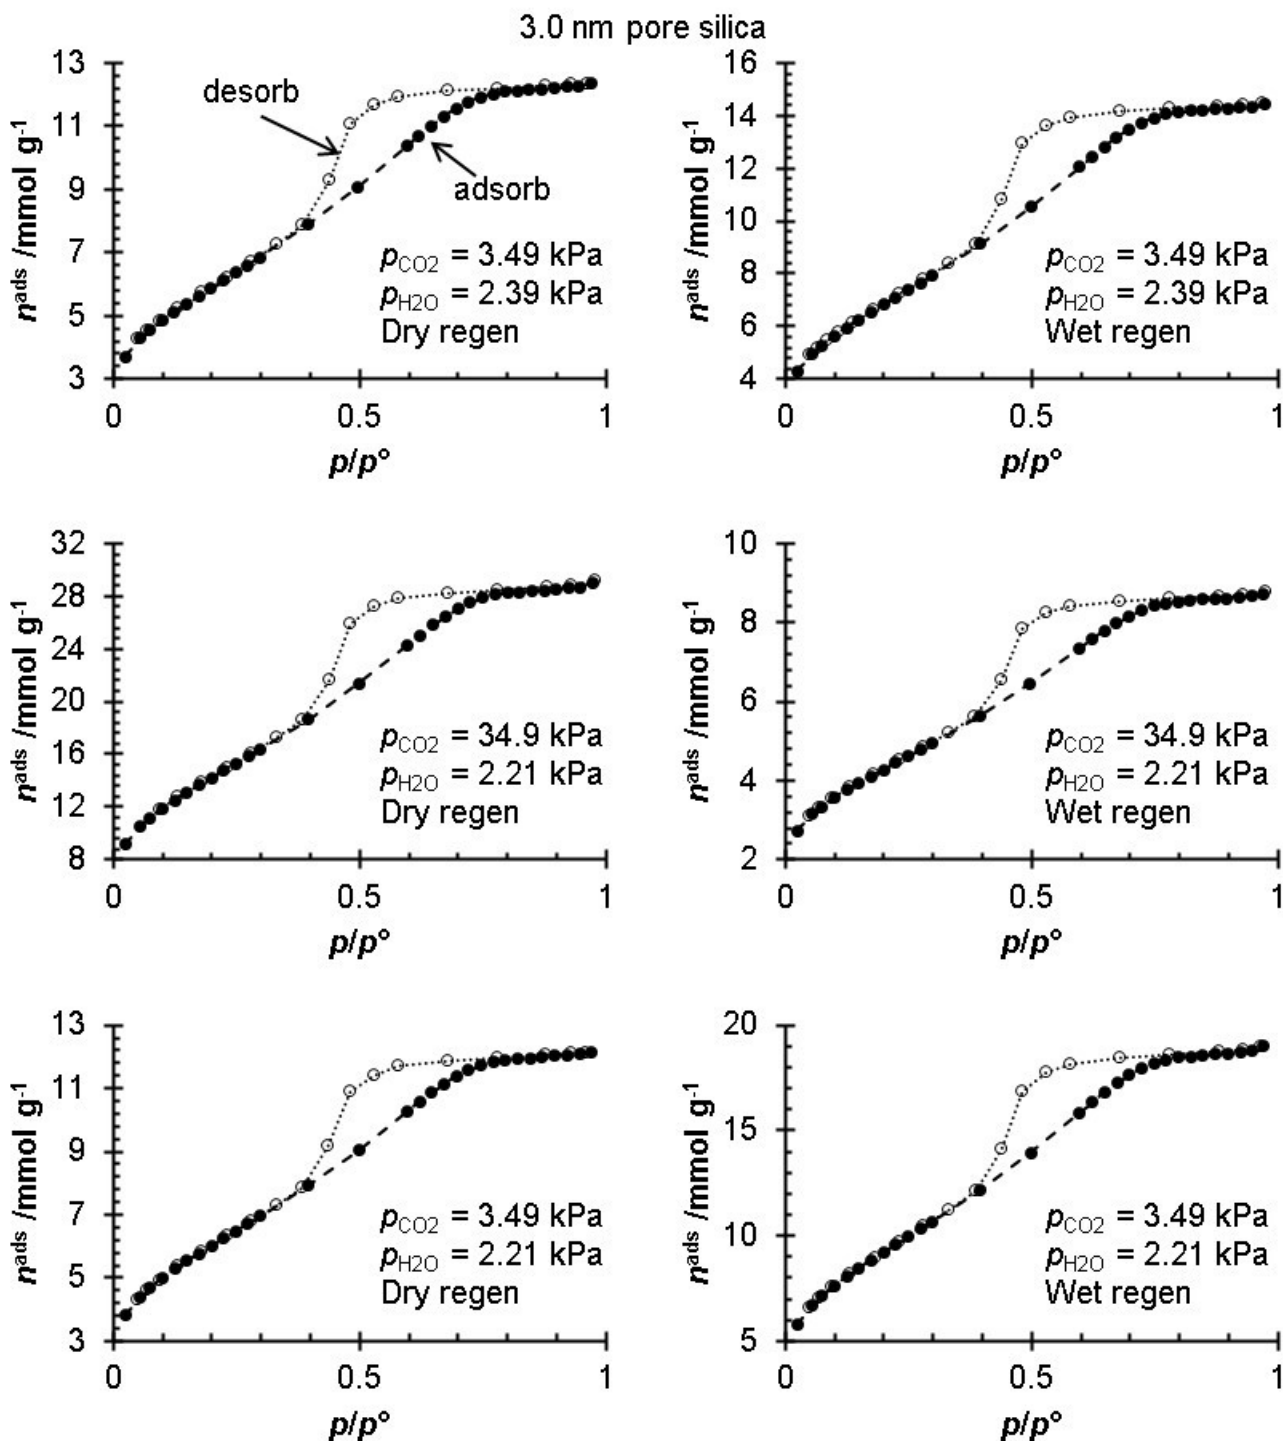

**Figure S3.** The  $N_2$  adsorption (●, —) and desorption (○, - -) plots of the 3.0 nm pore silica samples after 5,000 TSA cycles.

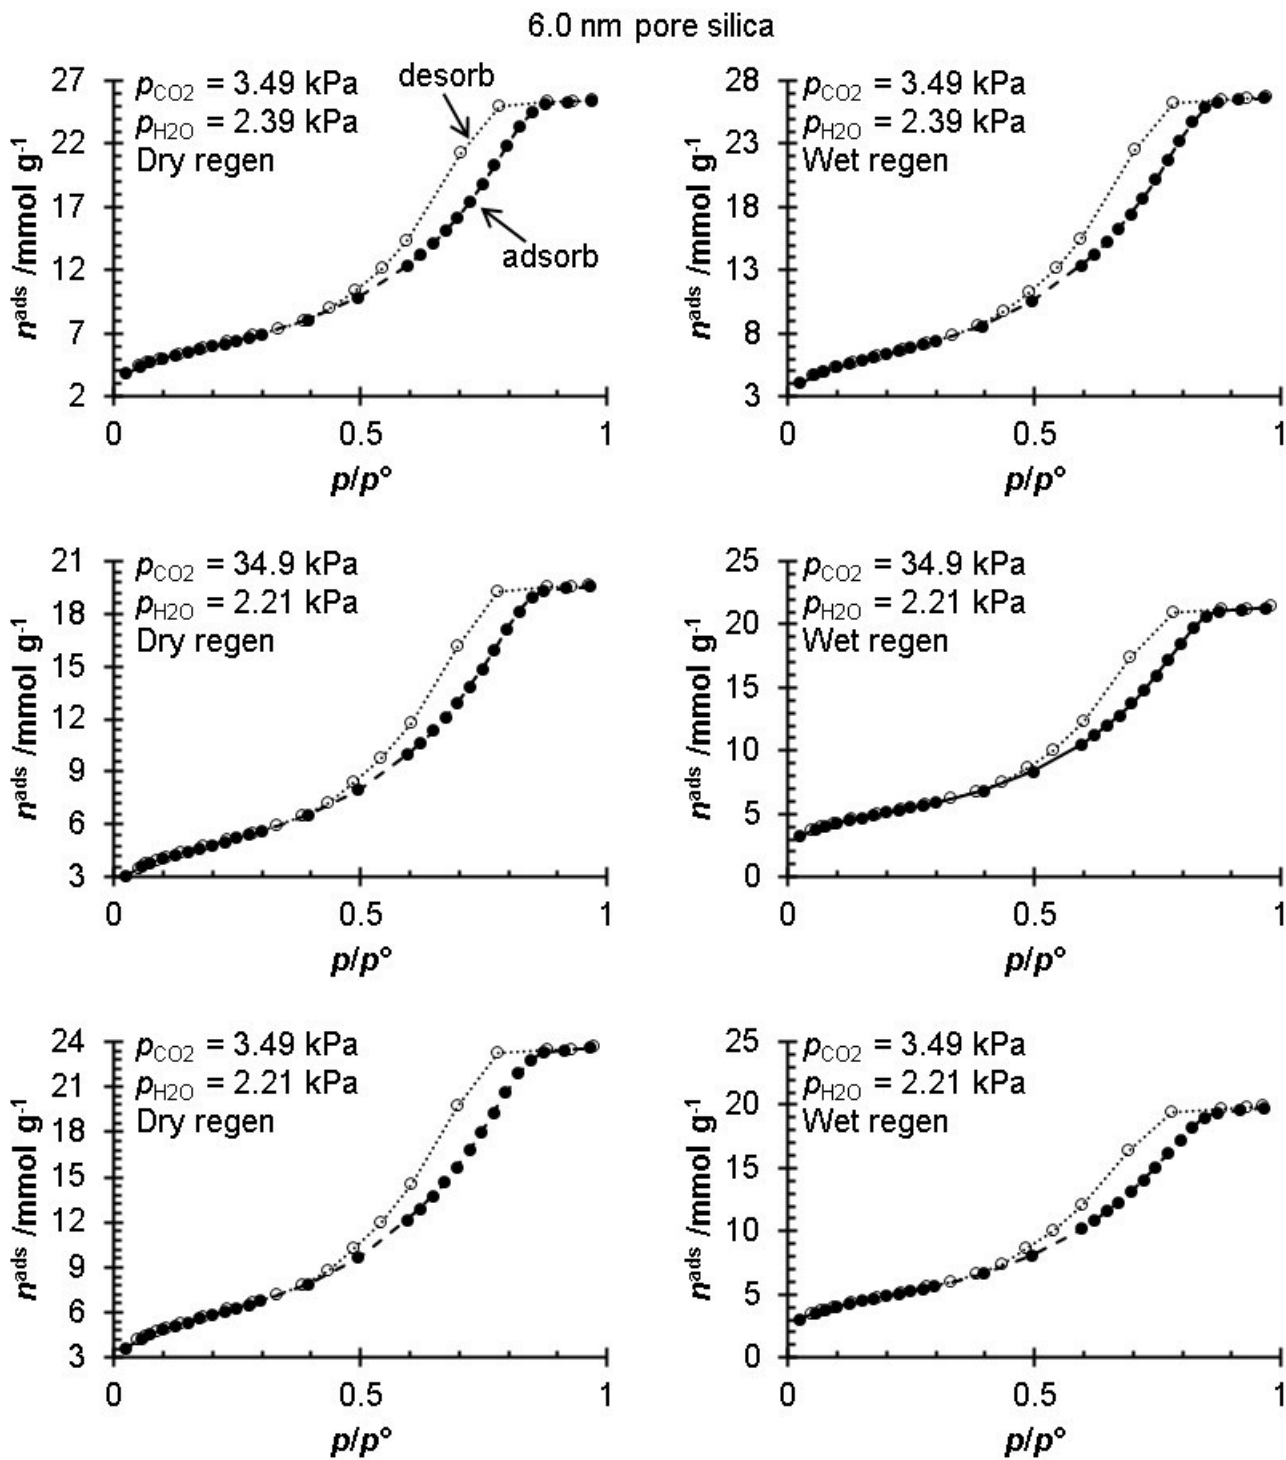

**Figure S4.** The N<sub>2</sub> adsorption (●, —) and desorption (○, - -) plots of the 6.0 nm pore silica samples after 5,000 TSA cycles.

### 2.2 nm pore silica

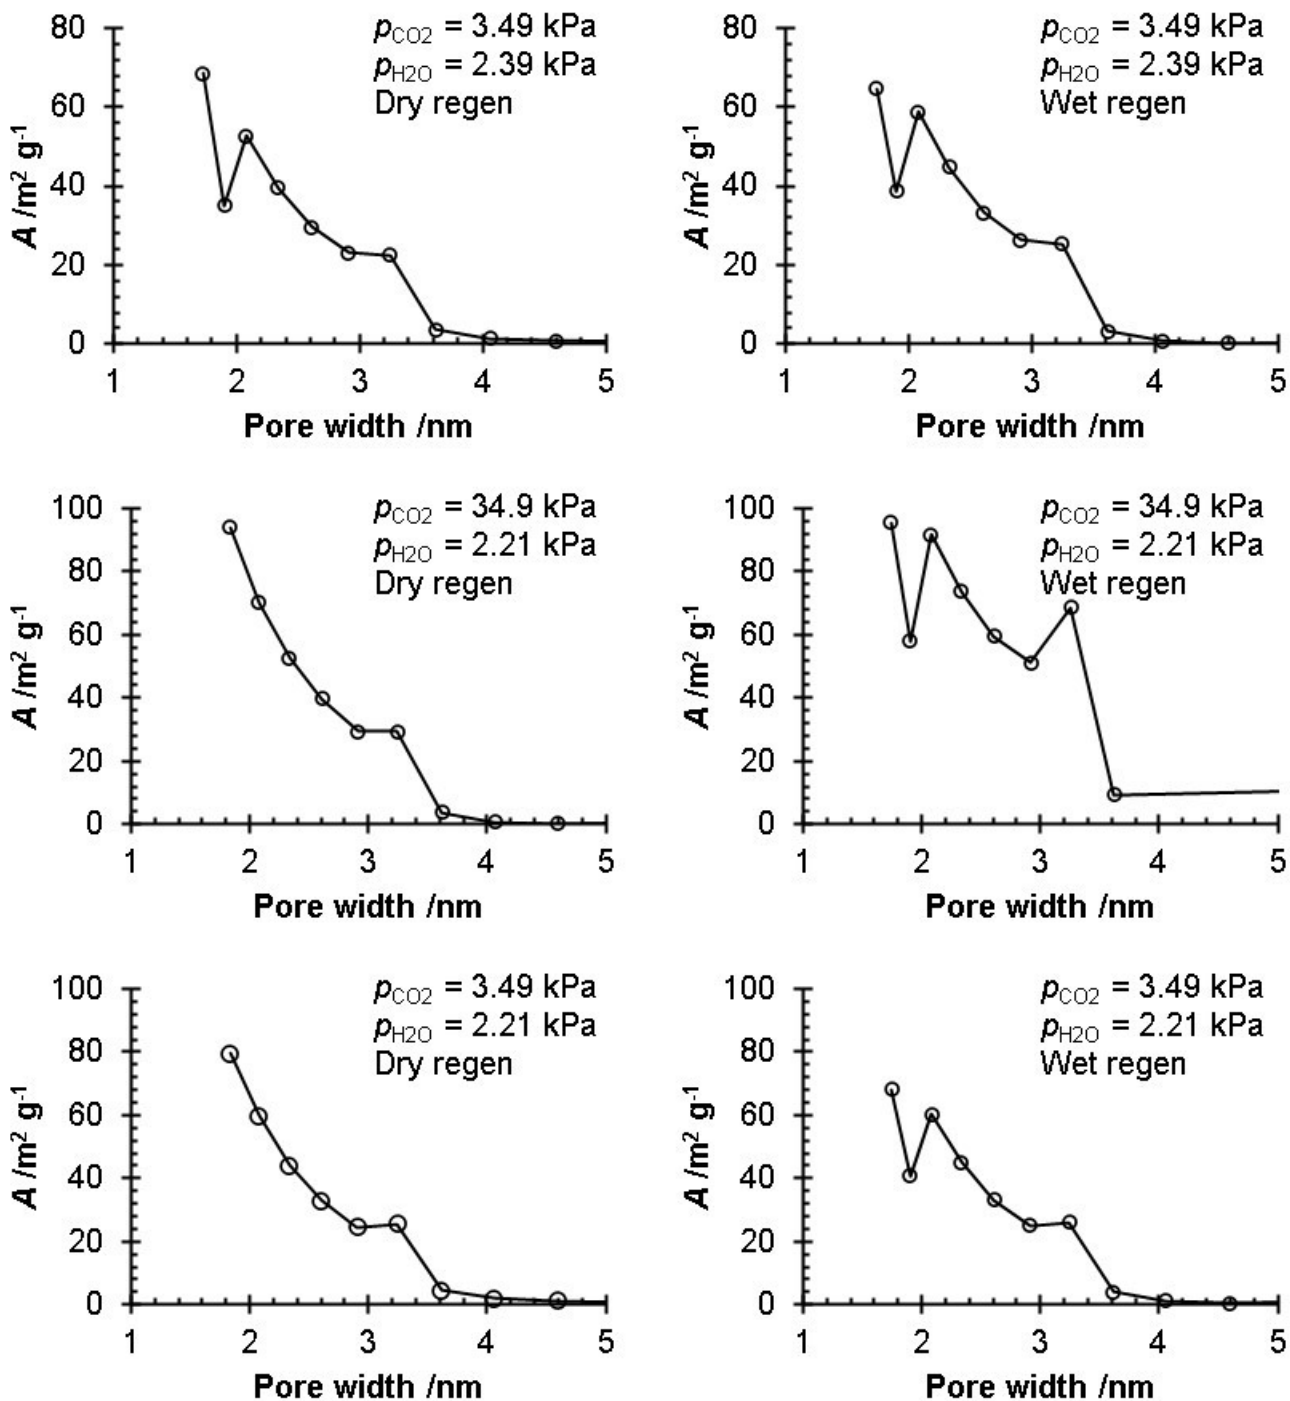

**Figure S5.** The BJH pore size distribution of the 2.2 nm pore silica gel samples after 5,000 TSA cycles.

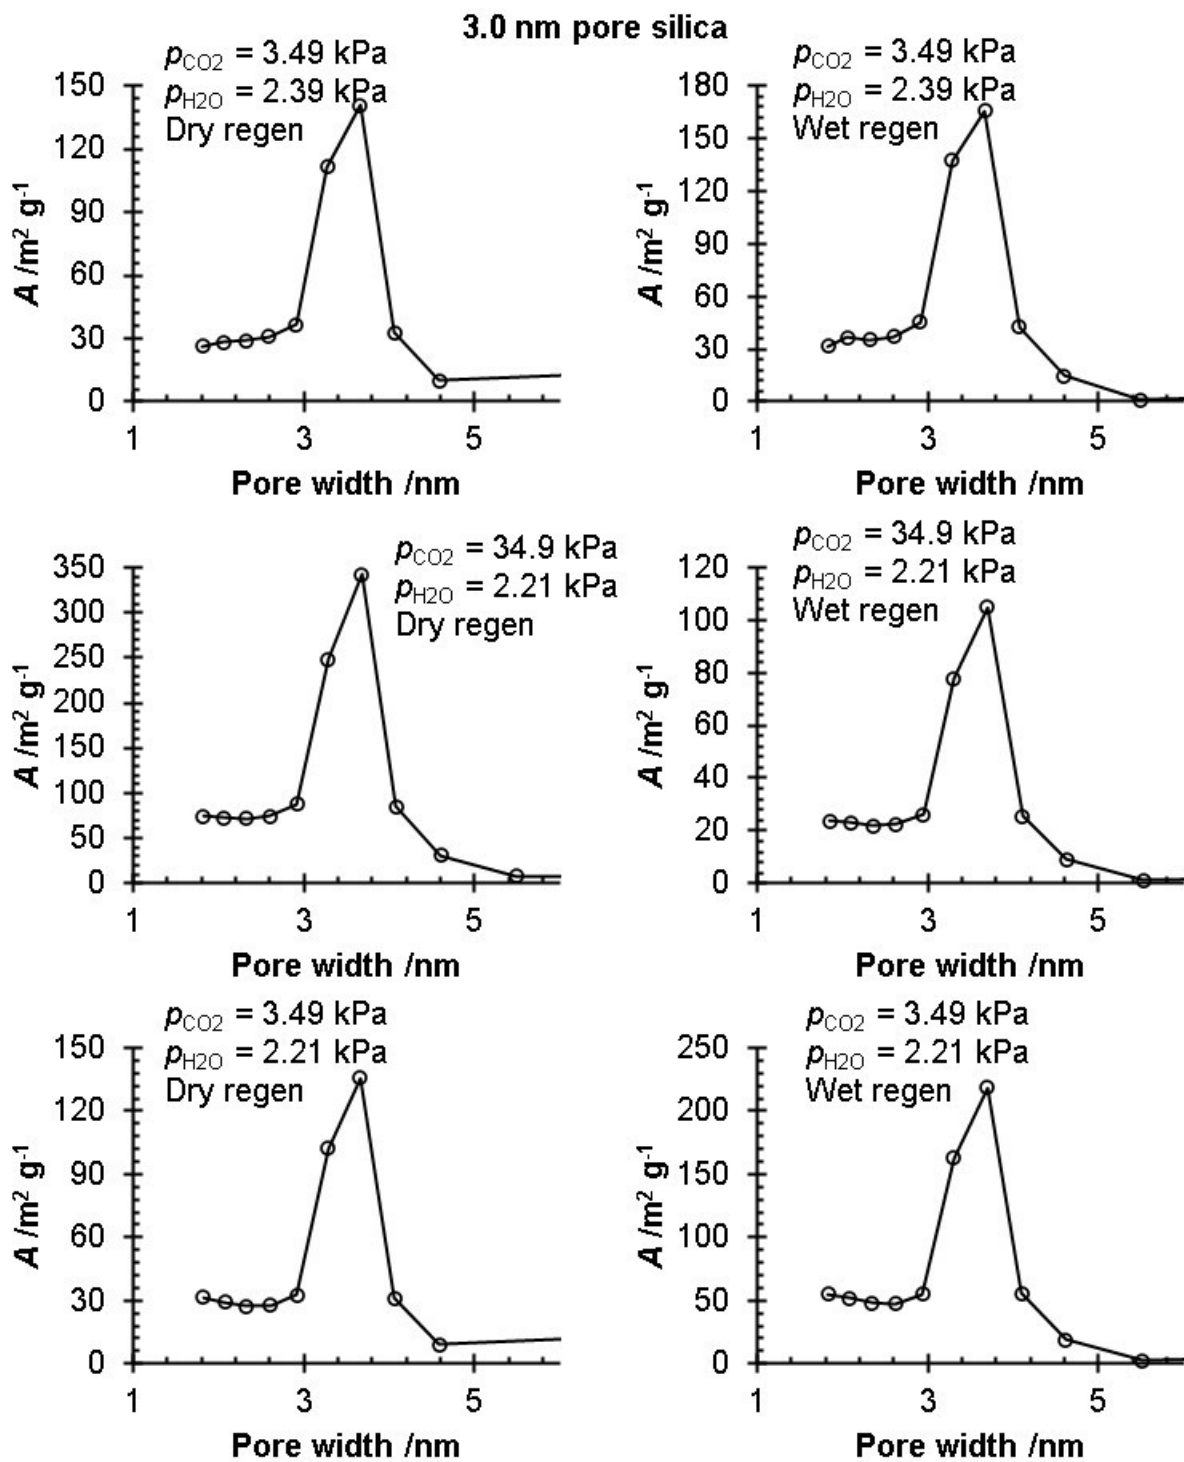

**Figure S6.** The BJH pore size distribution of the 3.0 nm pore silica gel samples after 5,000 TSA cycles.

6.0 nm pore silica

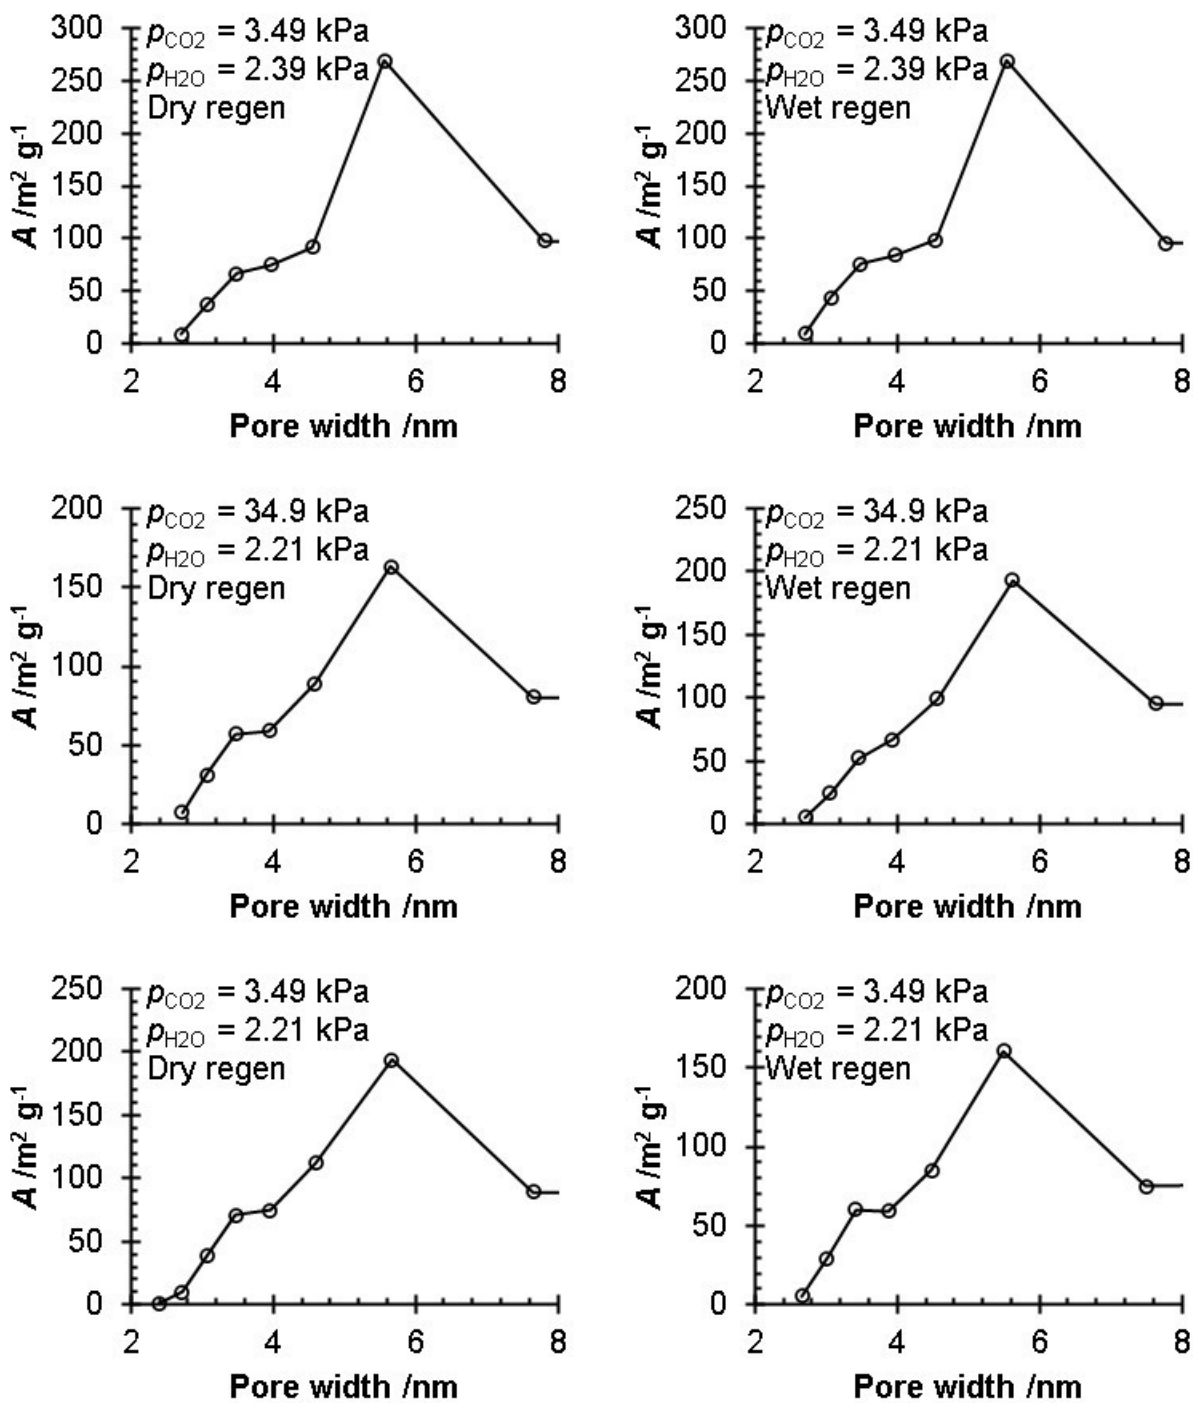

Figure S7. The BJH pore size distribution of the 6.0 nm pore silica gel samples after 5,000 TSA cycles.
